1 **Mechanism of manganese dysregulation of dopamine neuronal activity**

2  
3

4 Min Lin<sup>1</sup>, Luis M. Colon-Perez<sup>2</sup>, Danielle O. Sambo<sup>1</sup>, Douglas R. Miller<sup>1</sup>, Joseph J. Lebowitz<sup>1</sup>,  
5 Felix Jimenez-Rondan<sup>3</sup>, Robert J. Cousins<sup>3</sup>, Nicole Horenstein<sup>4</sup>, Tolunay Beker Aydemir<sup>5</sup>,  
6 Marcelo Febo<sup>2</sup>, Habibeh Khoshbouei<sup>1</sup>

7

8 <sup>1</sup>Department of Neuroscience, University of Florida, Gainesville, FL 32611

9 <sup>2</sup>Department of Psychiatry, University of Florida, Gainesville, FL 32611

10 <sup>3</sup>Center for Nutritional Sciences, University of Florida, Gainesville, FL 32611

11 <sup>4</sup>Department of Chemistry, University of Florida, Gainesville, FL 32611

12 <sup>5</sup>Division of Nutritional Sciences, Cornell University, Ithaca, NY 14850

13

14 Authors' contributions: M.L. designed and performed experiments, analyzed the data, and wrote  
15 the manuscript; L.M.C.P. performed experiments and analyzed the data; D.M. performed  
16 experiments; D.S. performed experiments and wrote the manuscript, J.L. performed experiments;  
17 F.J.R. performed experiments and analyzed data; R.J.C. designed and performed experiments,  
18 analyzed the data, and wrote the manuscript; N.H. performed modeling and wrote the manuscript;  
19 T.B.A. designed and performed experiments, analyzed data, and wrote the manuscript; M.F.  
20 designed and performed experiments, analyzed data, and wrote the manuscript; H.K. designed  
21 experiments, reviewed the data, and wrote the manuscript.

22

23 Conflict of interest: The authors do not have a conflict of interest.

24 Data availability: All data are made publicly available via DRYAD repository.

25

26 Corresponding Author:

27 Habibeh Khoshbouei

28 [Habibeh@ufl.edu](mailto:Habibeh@ufl.edu)

29

30 Key words: Manganese, Dopamine Neurons, L-type Calcium Channel, Synaptic Transmission,  
31 Parkinson's Disease

32

33

34 **Abstract**

35 Manganese exposure produces Parkinson's-like neurological symptoms, suggesting a selective  
36 dysregulation of dopamine transmission. It is unknown, however, how manganese accumulates in  
37 dopaminergic brain regions or how it regulates the activity of dopamine neurons. Our *in vivo*  
38 studies suggest manganese accumulates in dopamine neurons of the ventral tegmental area and  
39 substantia nigra via nifedipine-sensitive Ca<sup>2+</sup> channels. Manganese produces a Ca<sup>2+</sup> channel-  
40 mediated current which increases neurotransmitter release and rhythmic firing activity of  
41 dopamine neurons. These increases are prevented by blockade of Ca<sup>2+</sup> channels and depend on  
42 downstream recruitment of Ca<sup>2+</sup>-activated potassium channels to the plasma membrane. These  
43 findings demonstrate the mechanism of manganese-induced dysfunction of dopamine neurons, and  
44 reveal a potential therapeutic target to attenuate manganese-induced impairment of dopamine  
45 transmission.

46

47 **Significance Statement**

48 Manganese is a trace element critical to many physiological processes. Overexposure to  
49 manganese is an environmental risk factor for neurological disorders such as a Parkinson's disease-  
50 like syndrome known as manganism. We found manganese dose-dependently increased the  
51 excitability of dopamine neurons, decreased the amplitude of action potentials, and narrowed  
52 action potential width. Blockade of Ca<sup>2+</sup> channels prevented these effects as well as manganese  
53 accumulation in the mouse midbrain *in vivo*. Our data provide a potential mechanism for  
54 manganese-regulation of dopaminergic neurons.

55

56 **Introduction**

57 Manganese is a trace element critical to many physiological and developmental processes,  
58 including the regulation of macronutrient metabolism, blood glucose, cellular energy, reproduction,  
59 digestion, and bone growth (Greene and Madgwick, 1988; Erikson et al., 2005). Manganese is a  
60 cofactor for several enzymatic processes and a constituent of metalloenzymes, including arginase,  
61 pyruvate carboxylase, and manganese-containing superoxide dismutase (Ashner and Aschner,  
62 2005; Ashner et al., 2007; Guilarte, 2010). Except in children on long-term parenteral nutrition or  
63 individuals with mutations in the metal transporter SLC39A8 gene, manganese deficiencies are  
64 seldom reported (Greene and Madgwick, 1988; Zogzas and Mukhopadhyay, 2017). In contrast,  
65 excess manganese accumulation in the brain following environmental exposure is implicated in  
66 abnormalities related to the dopaminergic system, including Parkinson-like motor dysfunction  
67 (Jankovic, 2005), ataxia (Soriano et al., 2016), and hallucinations (Verhoeven et al., 2011). Animal  
68 models of manganism have shown that a single large exposure or prolonged moderate exposure to  
69 excess manganese is detrimental to the basal ganglia function (Michalke and Fernsebner 2014;  
70 Olanow, 2004), albeit with less understood mechanisms.

71  
72 Manganese can enter the central nervous system (CNS) through the cerebral spinal fluid or by  
73 crossing cerebral capillary endothelial membranes (Aschner et al., 2007). Physiological  
74 concentrations of manganese in the human brain range from 20 to 53  $\mu\text{M}$  (Bowman and Aschner,  
75 2014) but can increase several-fold upon overexposure both in humans (Crossgrove and Zheng,  
76 2004; Kessler et al., 2003) as well as rodents (Liu et al., 2006). Existing studies have used a wide  
77 range (60–150  $\mu\text{M}$ ) of extracellular manganese to investigate manganese-associated neurotoxicity  
78 (Bowman and Aschner, 2014; Tuschl et al., 2013). Studies on manganese transport in mammalian  
79 systems have largely focused on influx mechanisms (Au et al., 2008). Manganese is transported

80 into neurons, and possibly other CNS cell types, through a number of transporters, including  
81 divalent metal transporters (Gunshin et al., 1997), the transferrin receptor (Gunter et al., 2013),  
82 store-operated  $\text{Ca}^{2+}$  channels (Crossgrove and Yokel, 2005), the choline transporter (Lockman et  
83 al., 2001), the magnesium transporter (Goytain et al., 2008), and the NMDA receptor (Itoh et al.,  
84 2008). In addition, ZIP14 is shown to uptake manganese in human neuroblastoma cells (Fujishiro  
85 et al., 2014). The clinical effects of manganese toxicity are primarily Parkinson-like in nature  
86 (Jankovic 2005). This includes movement disorders characterized by tremor, rigidity, dystonia  
87 and/or ataxia; psychiatric disturbances including irritability, impulsiveness, agitation, obsessive-  
88 compulsive behavior, and hallucinations; and cognitive deficits such as memory impairment,  
89 reduced learning capacity, decreased mental flexibility, and cognitive slowing (Josephs et al.,  
90 2005). Neuronal degeneration and altered neurotransmitter release occur in brain regions with  
91 abnormally high accumulation of manganese, including the dorsal striatum, internal globus  
92 pallidus (GPi), and substantia nigra pars reticulata (SNpr) (Crossgrove and Zheng, 2004; Guilarte,  
93 2010; Perl and Olanow, 2007; Uchino et al., 2007). In addition, neuronal loss and gliosis in the  
94 globus pallidus, SNpr, and striatum are reported with high accumulation of manganese (Olanow,  
95 2004). Consistently, there is severe cell loss in the substantia nigra pars compacta (SNpc) of  
96 individuals with documented chronic manganese exposure, typically through occupational or  
97 environmental means (Perl and Olanow, 2007). More recently, mutations in the human metal  
98 transporter genes ZNT10 and ZIP14 have shown to cause manganese overload and motor  
99 dysfunction (Leyva-Illades et al., 2014; Tuschl et al., 2013). In addition to these clinical findings,  
100 previous studies show a correlation between elevated extracellular manganese levels in the brain  
101 and dysfunction of dopamine transmission (Dodd et al., 2013; Madison et al., 2012), where  
102 manganese reduced dopamine uptake and amphetamine-induced dopamine efflux (Roth et al.,

103 2013). Manganese exposure in developing rats reduces both the levels and activity of striatal D<sub>2</sub>  
104 receptors (Seth and Chandra, 1984; Rogers et al., 2014), supporting the overarching hypothesis for  
105 manganese-mediated dysregulation of the dopaminergic system.

106

107 The mechanism by which manganese dysregulates dopamine neurons is poorly understood. One  
108 potential mechanism by which manganese can regulate cellular responses is through the  
109 modulation of Ca<sup>2+</sup> concentrations, which not only regulates membrane potential but also serves  
110 as an important signaling molecule (Clapham, 2007). Manganese has been shown to regulate Ca<sup>2+</sup>  
111 signaling in primary astrocytes cultures where exposure to manganese results in mitochondrial  
112 sequestration of Ca<sup>2+</sup> which in turn reduces the available pool of releasable Ca<sup>2+</sup> within the  
113 endoplasmic reticulum (Tjalkens et al., 2006). This can affect the production of reactive oxygen  
114 species, free radicals, and toxic metabolites; alteration of mitochondrial function and ATP  
115 production; and depletion of cellular antioxidant defense mechanisms (Martinez-Finley et al., 2013;  
116 Puskin and Gunter, 1973). In primary astrocytes, manganese rapidly inhibits ATP-induced Ca<sup>2+</sup>  
117 waves and Ca<sup>2+</sup> transients (Streifel et al., 2013) as well as decreases the influx of extracellular Ca<sup>2+</sup>  
118 induced by 1-oleoyl-2-acetyl-sn-glycerol (OAG), a direct activator of the transient receptor  
119 potential channel TRPC3 (Streifel et al., 2013).

120

121 The mechanistic relationship between manganese-regulation of Ca<sup>2+</sup> signaling and excitability of  
122 dopamine neurons has remained unclear. Recently, we have shown changes in Ca<sup>2+</sup> homeostasis  
123 in the dopamine neurons influence neuronal activity indirectly through Ca<sup>2+</sup>-activated potassium  
124 channels (Lin et al., 2016). In the current study, we report a mechanistic link between manganese  
125 regulation of the excitability of dopamine neurons and manganese modulation of Ca<sup>2+</sup> channels.

126 Here, we identified a cellular mechanism by which manganese accumulates in the midbrain,  
127 influxes into dopamine neurons, and regulates the activity of dopamine neurons. Contrary to our  
128 initial hypothesis, we found manganese does not block Ca<sup>2+</sup> channels in dopamine neurons but  
129 acts as a substrate for Ca<sup>2+</sup> channels. The influx of manganese through the nifedipine-sensitive  
130 Ca<sup>2+</sup> channels was further supported by computational modeling, single neuron analysis, and *in*  
131 *vivo* magnetic resonance imaging experiments showing blockade of Cav1.2 channels decreased  
132 manganese regulation of dopaminergic neuronal activity and its accumulation in the midbrain.  
133 These data address the existing debate in the field regarding manganese regulation of Ca<sup>2+</sup> channels  
134 in dopamine neurons. The mechanistic results reported here provide a clinically relevant  
135 therapeutic target that could attenuate the severity of manganese toxicity in patients exposed to  
136 excess manganese.

137

## 138 **Materials and Methods**

139

140 ***Drugs and reagents:*** The drugs and reagents used in this study were purchased from Millipore  
141 Sigma-Aldrich (St. Louis, Mo), unless otherwise stated. Chemical reagents and drugs used for  
142 primary neuronal culture are listed in Table 1. Antibodies used for Western blot analysis are listed  
143 in Table 2. The catalog number of the reagents and drugs used for electrophysiology and  
144 microscopy experiments are listed in Table 3.

145

146 ***Animals:*** Midbrain neuronal cultures were obtained from RFP::TH C57BL/6 mice (obtained from  
147 Dr. Douglas McMahon, Vanderbilt University), a transgenic mouse strain where the dopamine  
148 neurons are rendered fluorescent by expressing the red fluorescent protein (RFP) under the tyrosine

149 hydroxylase (TH) promoter (Zhang et al., 2004). Mice conditionally expressing GCaMP6f in  
150 dopaminergic neurons were generated by crossing animals expressing Cre recombinase under  
151 control of the Slc6a3 promoter (B6.SJL-Slc6a3tm1.1 (cre)Bkml J; Jackson Lab, Stock: 006660)  
152 to animals expressing GcaMP6f under control of the LoxP promoter (B6;129s-Gt(ROSA)  
153 26Sortm95.1 (CAG-GCaMP6f HzeI J; Jackson Lab, stock: 024105). Mice were housed in the  
154 animal care facilities at the University of Florida in accordance with Institutional Animal Care and  
155 Use Committee, under guidelines established by National Institutes of Health. Food and water  
156 were available *ad libitum* in the home cage. Animals were housed under standard conditions at  
157 22–24°C, 50–60% humidity, and a 12 h light/dark cycle.

158

159 ***Manganese concentrations used in this study:*** The physiological concentration of manganese in  
160 the human brain is estimated to be between 5.32 and 14.03 ng manganese /mg protein, equivalent  
161 to 20.0–52.8  $\mu\text{M}$  (Bowman and Aschner, 2014). Average cellular manganese content in animal  
162 models of chronic manganese exposure is as high as 10.95  $\mu\text{g g}^{-1}$  (200  $\mu\text{M}$ ), which was shown to  
163 decrease the viability of dopamine neurons (Higashi et al., 2004). Using this information, we first  
164 performed dose response experiments (Figure 1 and 2) and found that 100  $\mu\text{M}$  manganese is a  
165 suitable concentration to study manganese-regulation of intrinsic firing behavior of dopamine  
166 neurons.

167 Mice were injected intraperitoneally (i.p.) with manganese (II) chloride tetrahydrate (70 mg/kg,  
168  $\text{MnCl}_2 \cdot 4\text{H}_2\text{O}$ ) in a sub-acute treatment based on a published protocol shown to significantly  
169 increase manganese concentrations in the basal ganglia (Dodd et al., 2005).

170

171 **Neuronal and cells culture:** Neuronal primary culture was performed as previously described  
172 (Saha et al., 2014; Lin et al., 2016; Sambo et al., 2017). Briefly, mouse midbrain dopamine neurons  
173 from 0-2 day old pups of either sex were isolated and incubated in a dissociation medium (in mM):  
174 116 NaCl; 5.4 KCl; 26 NaHCO<sub>3</sub>; 25 glucose; 2 NaH<sub>2</sub>PO<sub>4</sub>; 1 MgSO<sub>4</sub>; 1.3 cysteine; 0.5 EDTA; 0.5  
175 kynurenate containing 20 units/mL papain at 34-36°C under continuous oxygenation for 2 hours.  
176 Tissue was then triturated with a fire-polished Pasteur pipette in glial medium (in %): 50 minimum  
177 essential media; 38.5 heat-inactivated fetal bovine serum; 7.7 penicillin/streptomycin; 2.9 D-  
178 glucose (45%) and 0.9 glutamine (200 mM). Dissociated cells were pelleted by centrifugation at  
179 500 x g for 10 min and re-suspended in glial medium. Cells were plated on 12 mm round coverslips  
180 coated with 100 µg/ml poly-L-lysine and 5 µg/ml laminin in 35 x 10 mm tissue culture Petri  
181 dishes. One hour after plating, the medium was changed to neuronal medium: Neurobasal (Life  
182 Technologies, Grand Island, NY), 0.9% L-glutamine, 2% B27 and 1 ng/ml GDNF. Neuronal  
183 medium was conditioned overnight on cultured glia. The conditioned neuronal medium was  
184 supplemented with 1 ng/mL glial cell line-derived neurotrophic factor and 500 µM kynurenate and  
185 sterile-filtered before it was added to the neuronal cultures.  
186  
187 Plasmids for Ca<sub>v</sub>1.2-GFP and Ca<sub>v</sub>1.3-GFP were generous gifts from Dr. Gregory Hockerman  
188 (Purdue University). Briefly, cDNAs that encode the cytoplasmic II-III inter-domain loop of  
189 Ca<sub>v</sub>1.2 (amino acids 758-903) or Ca<sub>v</sub>1.3 (amino acids 752-885) were fused to enhanced GFP were  
190 constructed in the pEGFP-N1 vector (Clontech, Mountain View, CA). Plasmids were transformed  
191 into MAX Efficiency DH5α Competent Cells (Invitrogen, Waltham, MA) and amplified on Luria-  
192 Bertani (LB) agar plates with an ampicillin concentration of 50 mg/L. Individual colonies were  
193 selected and further amplified in 250 mL LB medium with 50 mg/L ampicillin. Plasmid DNAs



194 were purified using the Qiagen Plasmid Plus Maxi Kit (Qiagen, Germantown, MD). The integrity  
195 of the clones was confirmed by cDNA sequencing and restriction digest analysis.

196  
197 HEK 293 cells stably expressing Ca<sub>v</sub>1.2 or 1.3 were generous gift from Dr. Richard B. Silverman  
198 (University of Chicago). Cells were maintained in DMEM (ThermoFisher) supplemented with 10%  
199 fetal bovine serum (Gemini Cat. No. 100-106), 1.1 mM sodium pyruvate (Sigma-Aldrich Cat. No.  
200 S8636-100ML), 0.1 mg/mL Zeocin (InvivoGen Cat. No. ant-zn-1), and 0.05 mg/mL Hygromycin  
201 B (A.G. Scientific Cat. No. H-1012-PBS). Additionally, either 0.3 mg/mL G418 (Caisson Labs  
202 Cat. No. ABL06-20ML) or 0.2 mg/mL Blasticidin S hydrochloride (Research Products  
203 International Cat. No. B12200-0.05) was added for Ca<sub>v</sub>1.2 or Ca<sub>v</sub>1.3, respectively. Cells were  
204 passaged at 70-85% confluency 24-48 hours prior to experimentation using TrypLE Express  
205 Enzyme (Gibco Cat. No. 12604-021).

206  
207 **<sup>54</sup>Mn uptake:** Effectene reagent (Qiagen, Valencia, CA) was used for transient transfection of  
208 HEK cells with a plasmid vector either empty or containing Ca<sub>v</sub>1.2 or Ca<sub>v</sub>1.3 cDNA.  
209 Overexpression of Ca<sub>v</sub>1.2 and Ca<sub>v</sub>1.3 was assessed by the western blotting 48 hours after  
210 transfection (Millipore Sigma). For <sup>54</sup>Mn uptake experiments, following a 48-hour transfection,  
211 the cells were washed with Hanks' balanced salt solution (HBSS) and incubated at 37°C in serum-  
212 free DMEM containing 40 μM MgCl<sub>2</sub> and <sup>54</sup>Mn at 0.18 μCi /mL (PerkinElmer). In some  
213 experiments, cells were pretreated with 10 μM Nifedipine 30 minutes before <sup>54</sup>Mn treatment. After  
214 incubation with <sup>54</sup>Mn for the times indicated, cells were washed with chelating buffer (10 mM  
215 EDTA, 10 mM HEPES, and 0.9% NaCl) and solubilized in 0.2% SDS 0.2 M NaOH for 1 hour.  
216 Radioactivity was measured by gamma-ray solid scintillation spectrometry. Protein content was

217 measured colorimetrically with BCA reagent (Pierce-Thermo Fisher Scientific). Results were  
218 expressed as counts per minute (cpm) per mg total protein.

219

220 ***Electrophysiological recordings:*** Spontaneous firing activity of midbrain dopamine neurons was  
221 examined via whole cell current clamp recordings as previously described (Saha et al., 2014; Lin  
222 et al., 2016; Sambo et al., 2017). The neurons were continuously perfused with artificial cerebral  
223 spinal fluid (aCSF) containing (in mM): 126 NaCl, 2.5 KCl, 2 CaCl<sub>2</sub>, 26 NaHCO<sub>3</sub>, 1.25 NaH<sub>2</sub>PO<sub>4</sub>,  
224 2 MgSO<sub>4</sub>, and 10 dextrose, equilibrated with 95% O<sub>2</sub>-5% CO<sub>2</sub>; pH was adjusted to 7.4. Patch  
225 electrodes were fabricated from borosilicate glass (1.5 mm outer diameter; World Precision  
226 Instruments, Sarasota, FL) with the P-2000 puller (Sutter Instruments, Novato, CA). The tip  
227 resistance was in the range of 3-5 MΩ. The electrodes were filled with a pipette solution containing  
228 (in mM): 120 potassium-gluconate, 20 KCl, 2 MgCl<sub>2</sub>, 10 HEPES, 0.1 EGTA, 2 ATP, and 0.25  
229 GTP, with pH adjusted to 7.25 with KOH. All experiments were performed at 37°C. To standardize  
230 action potential (AP) recordings, neurons were held at their resting membrane potential (see below)  
231 by DC application through the recording electrode. Action potential was recorded if the following  
232 criteria were met: a resting membrane potential of less than -35 mV and an action potential peak  
233 amplitude of >60 mV. Action potential half-width was measured as the spike width at the half-  
234 maximal voltage using Clampfit 10 software (Axon instruments, Foster City, CA). Steady-state  
235 basal activity was recorded for 2–3 min before bath application of the drug. For experiments  
236 involving drug application, each coverslip was used for only one recording. The spontaneous spike  
237 activity of midbrain dopamine neurons was obtained by averaging 1 min interval activities at  
238 baseline (before manganese) and after 7-10 min of manganese. The relationship between Mn  
239 concentration and neuronal firing frequency was fitted according to a Hill equation:  $E =$

240  $E_{max}Mn^{nH}/(EC_{50} + Mn^{nH})$  where E is the predicted effect of Mn,  $E_{max}$  is the maximum effect,  $nH$   
241 is the slope factor, and the  $n$ th root of  $EC_{50}$  gives an estimate of the midpoint of the activation  
242 curve.

243

244 **Recording from HEK Cells expressing GFP- $\alpha$  subunits:** HEK293 cells stably expressing GFP- $\alpha$   
245 subunits where generous gift from Dr. Robert Brenner (University of Texas Health Science Center  
246 at San Antonio). The cells were cultured as described previously (Goodwin et al., 2009; Saha et  
247 al., 2014; Wang et al., 2009). The cells were plated on glass coverslips (Electron Microscopy  
248 Sciences, Hatfield, PA). Green fluorescent protein expression was used to identify  $\alpha$  subunits-  
249 expressing cells. Electrophysiology experiments were performed 3 days after plating the cells.  
250 Macropatch recordings were performed using the excised inside-out patch clamp configuration at  
251 22 - 23°C. Patch pipettes were pulled to a final tip resistance of 1.5–3 M $\Omega$  and filled with the  
252 internal solution. The electrode solution was composed of the following (in mM): 20 HEPES, 140  
253 KMeSO<sub>3</sub>, 2 KCl, and 2 MgCl<sub>2</sub>, pH 7.2. Bath solution was composed of a pH 7.2 solution of the  
254 following (in mM): 20 HEPES, 140 KMeSO<sub>3</sub>, and 2 KCl. Intracellular Ca<sup>2+</sup> was buffered with 5  
255 mM HEDTA to give the required 10  $\mu$ M free [Ca<sup>2+</sup>] concentration calculated using the  
256 MAXCHELATOR program (Winmaxchelator software; Dr. Chris Patton, Stanford University,  
257 Pacific Grove, CA). Recordings and data acquisition were described in *Single-channel recordings*  
258 *above*. Mean current density was plotted against membrane potential ( $I$ - $V$ ) and was fitted by the  
259 Boltzmann equation:  $I = I_{min} + (I_{max} - I_{min})/(1 + \exp - \kappa(V - V_{1/2}))$ , where  $I$  is the current,  $I_{max}$  is  
260 the maximum current,  $I_{min}$  is the minimum current,  $\kappa$  is a slope factor, and  $V_{1/2}$  is the midpoint  
261 potential.

262

263 ***Pharmacological isolation of Ca<sup>2+</sup> currents:*** For whole-cell recordings, we used a Cesium  
264 methanesulfonate-based intracellular solution composited in mM: 110 CsMeSO<sub>3</sub>, 10 TEA-Cl, 10  
265 4-aminopyridine (4-AP), 10 HEPES, 1 MgCl<sub>2</sub>, 10 EGTA, 2 ATP and 0.3 GTP, with pH adjusted  
266 to 7.25 with CsOH. Bath solution contained following (in mM): 110 NaCl, 35 tetraethylammonium  
267 (TEA)-Cl, 1 CsCl, 1 MgSO<sub>4</sub>, 2 CaCl<sub>2</sub>, 10 HEPES, 11.1 dextrose and 0.001 tetrodotoxin (TTX),  
268 pH 7.4 with CsOH. For the Ca<sup>2+</sup>-free bath solution, 2 mM CaCl<sub>2</sub> was replaced with 3 mM MgCl<sub>2</sub>,  
269 a HEPES solution containing 4 mM Mg<sup>2+</sup>. Calcium currents were evoked by a series of 200-ms  
270 depolarizing steps from -60 to +85 mV in 5-mV increments. To avoid possible interference  
271 between responses, the depolarizing voltage steps were delivered every 5 s. Data were obtained in  
272 1- to 3-min intervals while the patches were held at -65 mV. The series resistances were in the  
273 range of 5–10 MΩ (typically 5 MΩ) and were compensated 60% on-line. Membrane potential  
274 measurements were not corrected for the liquid junction potential (~15 mV). Leak currents were  
275 subtracted using a standard P/4 protocol. Before seals (5 GΩ) were made on cells, offset potentials  
276 were nulled. Capacitance subtraction was used in all recordings. To determine current density (pA  
277 / pF), the peak current value of the steady-state current at 180 ms was divided by the membrane  
278 capacitance from each recorded cell.

279  
280 ***Preparation of mouse brain slices:*** Unless otherwise noted, 30-40 day-old C57BL/6 male mice in  
281 either wild type or mice conditionally expressing GCaMP6f in dopaminergic neurons (described  
282 above) were used for slice preparation. Only males heterozygous were selected and used for these  
283 experiments. Mice were deeply anesthetized with 4% isoflurane, and the brain was subsequently  
284 removed from the cranium. The tissue was glued onto the cutting stage and submersed in ice-cold,  
285 oxygenated aCSF (equilibrated with 95% O<sub>2</sub>-5% CO<sub>2</sub>). Coronal or horizontal brain slices (200 μm)

286 containing the substantia nigra compacta or striatum were cut using a MicroSlicer Zero 1N  
287 (Dosaka, Kyoto, Japan).

288

289 ***FFN200 loading and multiphoton imaging:*** Striatal slices of wild type mice were incubated in  
290 oxygenated aCSF with 10  $\mu$ M FFN200 (Tocris, Minneapolis, MN) for 30 min at 22–24° C and  
291 washed for 45–50 min before imaging. After incubation with FFN200, dorsal striatal slices were  
292 transferred into imaging chambers, then continuously perfused with aCSF equilibrated with 95%  
293 O<sub>2</sub>-5% CO<sub>2</sub>. *In vitro* multiphoton imaging was performed with a Nikon AR1 MP (Nikon  
294 Instruments Inc., Melville, NY, USA) equipped with a plan apo LWD 25x, water-immersion  
295 (NA=1.1, WD=1.43 - 2.04mm, DIC N2) objective. Multiphoton excitation was generated with a  
296 Spectra Physics 15 W Mai Tai eHP tunable Ti:sapphire femtosecond pulsed IR laser. FFN200  
297 imaging experiments were performed using excitation wavelengths of 830-840 nm and an  
298 emission of 430–470 nm. Emission light was directed with a 405 nm dichroic mirror through a  
299 340 nm short pass filter to enhanced hybrid PMTs via fluorophore specific filters. Imaging sites in  
300 time lapse experiments were aligned based on the multiphoton imaged dendritic structure and  
301 FFN200 puncta. Imaging sites in time lapse experiments were aligned based on the multiphoton  
302 imaged dendritic structure and FFN200 puncta. Images were collected with a 2.4  $\mu$ s pixel dwell  
303 time, with the laser attenuated to 3% of total power, a pixel size of 0.24  $\mu$ m (XY), and a step size  
304 of 0.5  $\mu$ m (Z) at 1,024  $\times$  1,024 pixel resolution. After acquiring an initial image (t = 0), perfusion  
305 was switched to aCSF containing 100  $\mu$ M MnCl<sub>2</sub> and images acquired every 4s. Control slices  
306 labeled with FFN200 were imaged 5 – 10 min in the absence of MnCl<sub>2</sub>.

307 Two photon images and analysis of fluorescent intensity for FFN200 puncta were performed using  
308 NIS-Elements Software v4.5 (Nikon Instruments Inc., Melville, NY, USA). Regions of interest

309 (ROIs) were automatically selected by the program. Background fluorescence intensity was  
310 determined as the mean fluorescence intensity of areas of the image that excluded puncta. The  
311 mean background-subtracted fluorescent puncta intensity was then calculated by subtracting the  
312 mean background intensity from the mean fluorescence intensity measured at the puncta.

313

314 ***Fura-2 calcium imaging:*** For Fura-2 calcium imaging, primary cultured midbrain neurons (8-10  
315 DIV) were used in all studies. Neurons were washed twice in HBSS (Life Technologies) followed  
316 by 30-min treatment in 5  $\mu$ M Fura-2 AM (Thermo Fisher). Cells were then washed twice with  
317 HBSS followed by 30-min incubation in HBSS. Cells were then imaged on a Nikon Ti Eclipse  
318 inverted microscope. Fluorescence was monitored using dual excitation wavelengths (340/380 nm)  
319 and a single emission wavelength (510 nm). Fura-2 bound to free calcium is excited at 340 nm,  
320 whereas unbound Fura-2 is excited at 380 nm. Baseline images were taken for 30 s to 1 min  
321 followed by addition of vehicle, 100  $\mu$ M manganese, or 20 mM caffeine as the positive control  
322 group. The concentration of caffeine used in this study was selected based on a previous study  
323 examining caffeine-regulation of  $Ca^{2+}$  mobilization in the midbrain dopamine neurons (Choi et al.,  
324 2006). Images were acquired for 4 min after treatment. For analysis, experimenter defined regions  
325 of interest (ROIs) were drawn along the cell body of each neuron.  $Ca^{2+}$  changes were determined  
326 as the fluorescence normalized to the average fluorescence of the first 30 s of baseline imaging for  
327 each neuron. The percent fluorescence change over baseline was calculated as:  $\% \Delta F/F_0 = (F_{\max} -$   
328  $F_0)/F_0 \times 100$ , where  $F_{\max}$  is the maximal fluorescent value after treatment and  $F_0$  is the average  
329 fluorescence at baseline. Images were presented as the ratio of 340/380 imaging.

330

331 ***Total internal reflection fluorescence microscopy (TIRFM)***: For these experiments, HEK293  
332 cells expressing GFP- $\alpha$  subunits were plated onto 35 mm glass-bottom dishes (No. 1 thickness) to  
333 60-80% confluence. Nikon Ti Eclipse (Nikon, Melville, NY) inverted microscope equipped with  
334 a multi-line solid-state laser source (470, 514, 561nm) was used for all TIRFM imaging. Lasers  
335 were guided through a 60X 1.4 NA objective. Images were detected digitally using a CCD camera.  
336 Image exposure time was coupled with stimulation duration at 100 ms and laser intensity was  
337 maintained at 40%. For quantification of fluorescence intensity at the cell surface, experimenter-  
338 defined ROIs were created for each cell in order to exclude both cell membrane overlap between  
339 adjacent cells and measurement of intensity at the peripheral edges of cells. Background  
340 fluorescence was subtracted from all images. Mean intensity over time for each ROI was recorded  
341 continuously before and after the application of 100  $\mu$ M manganese to the bath solution.  
342 Experiments were performed in the isotonic, isosmotic external solution described above. The  
343 baseline fluorescent intensity is defined as the average fluorescent intensity 1 min prior to drug  
344 application. All values were normalized to the baseline fluorescent intensity. Single count  
345 elementary sequential smoothing was applied for image presentation only, and not for analysis.  
346 Bleaching at each experimental time point was determined by the amount of decreased  
347 fluorescence intensity in untreated cells.

348  
349 ***Magnetic Resonance Imaging Scans***: Seventeen adult male mice (35-40 days-old male wild-type  
350 C57BL/6 mice) were randomly assigned to two groups either receiving manganese only or  
351 manganese plus nifedipine. Systemic injections of L-type  $\text{Ca}^{2+}$  channel inhibitor, nifedipine (15  
352 mg/kg), which can effectively cross the blood-brain barrier (Cain et al., 2002), were used to inhibit  
353 the L-type  $\text{Ca}^{2+}$  channels (Jinnah et al., 1999). The treatment doses were based on the previously

354 published protocols (Cain et al., 2002, Dodd et al., 2005, Jinnah et al., 1999). Both groups were  
355 intraperitoneal (i.p.) injected with manganese (II) chloride tetrahydrate (70 mg/kg), but one group  
356 received manganese injection after 30 min nifedipine (15 mg/kg, i.p) injection. Magnetic  
357 resonance (MR) scanning was performed twenty-four hours after manganese exposure. On the  
358 scanning day, mice were induced using 3-4% isoflurane delivered in medical grade air (70%  
359 nitrogen, 30% oxygen; air flow rate 1.5 mL/min). The anesthesia was maintained at 1.0-1.5%  
360 isoflurane during MRI scanning. Core body temperature and spontaneous respiratory rates were  
361 continuously recorded during MRI scanning (SA Instruments, Stony Brook, NY). Mice were  
362 maintained at normal body temperature levels (37– 38 °C) using a warm water recirculation system.  
363 The MEMRI scans were collected in a 4.7T/33 cm horizontal bore magnet (Magnex Scientific) at  
364 the Advanced Magnetic Resonance Imaging and Spectroscopy facility in the McKnight Brain  
365 Institute of the University of Florida. The MR scanner consisted of a 11.5 cm diameter gradient  
366 insert (Resonance Research, Billerica, MA, USA) controlled by a VnmrJ 3.1 software console  
367 (Agilent, Palo Alto, CA, USA). A quadrature transmit/receive radiofrequency (RF) coil tuned to  
368 200.6 MHz <sup>1</sup>H resonance was used for B1 field excitation and RF signal detection (airmri; LLC,  
369 Holden, MA). The MEMRI included a multiple repetition time sequence to calculate parametric  
370 T<sub>1</sub> maps for each group using a fast spin echo sequence with a total of four TR's (0.5, 1.08, 2.33,  
371 5.04 seconds), and TE = 6.02 ms with the following geometric parameters: 16 x 16 mm<sup>2</sup> in plane,  
372 14 slices at 0.8 mm thickness per slice, data matrix = 128 x 128 (125 μm in-plane resolution).

373

374 ***MRI Post-Processing:*** Whole brain masks were obtained via automatic segmentation with PCNN  
375 using high-resolution anatomical scans to remove non-brain voxels. All cropped data were used to  
376 create templates for each cohort using Advanced Normalization Tools (ANTs;



377 <http://stnava.github.io/ANTs/>). The templates were then registered to an atlas of the mice brain  
378 using the FMRIB Software Library linear registration program flirt (Jenkinson et al., 2002). The  
379 atlas was then transformed back to each individual data set with the registration matrices from  
380 ANTS. To generate parametric T1 maps, multi-TR images were fit to the equation  $S_{TR}=S_0(1-e^{-$   
381  $TR/T_1})$  using non-linear regression in QuickVol II for ImageJ (Schmidt et al., 2004). From T1 maps,  
382 the T1 relaxation rate ( $R_1$  in  $ms^{-1}$ ) is calculated and exported from regions of interest. These  
383 methods allowed the measurement of the amount of activity, along with the location of manganese  
384 uptake in both the control and drug exposed groups.

385

386 **Data acquisition and analysis:** The reported “n” for each experiment is obtained from at least  
387 three independent biological replicates. All statistical analyses were performed on data presented  
388 in the manuscript are stated in the figure legends and detailed in the methods and the results section.  
389 For each experiment, statistical tests were chosen based on the structure of the experiment and data  
390 set. No outliers were removed during statistical analysis. Sample sizes estimates were based on  
391 published biological, biochemical and electrophysiological literature that utilized the animal  
392 model; this was within a range commonly employed by researchers in our field using similar  
393 techniques. The electrophysiology data were acquired using the ClampEx 10 software (Molecular  
394 Devices). The data were analyzed off-line using pClamp 10. For all experiments, the data are  
395 presented as mean  $\pm$  SEM. N denotes the number of neurons, cells, or mice for each experiment.  
396 Statistical significance was assessed using two-tailed Student's *t* tests or one-way ANOVA. If  
397 ANOVA showed statistical significance, all pairwise *post hoc* analysis was performed using a  
398 Tukey's *post hoc* test. Differences were considered significant at  $P < 0.05$ . \* denotes significance  
399  $p < 0.05$ . \*\* denotes significance  $p < 0.01$ . The coefficient of variation is a measure of the relative

400 spread of the data. It is computed as the standard deviation divided by the mean times 100%.  
401 SigmaPlot 11 was used for all statistical analysis.

402

## 403 **Results**

404

405 We exploited multiple complementary approaches to identify dopamine neurons for the  
406 electrophysiological recordings, as described previously (Lin et al., 2016). A total of 149 midbrain  
407 dopamine neurons were recorded and analyzed as outlined below. The primary parameters of  
408 passive membrane and action potential were averaged in 30 randomly selected cells. The average  
409 resting membrane potential was  $-48.3 \pm 1.1$  mV; input resistance was  $252.5 \pm 21.9$  M $\Omega$ ; membrane  
410 time constant was  $826.9 \pm 52.5$   $\mu$ s; and membrane capacitance was  $64.1 \pm 3.3$  pF.

411

### 412 **Manganese altered the intrinsic firing behavior of midbrain dopaminergic neurons.**

413 Spontaneous firing activity of dopamine neurons was measured before and after manganese  
414 application at concentrations of 10, 30, and 100  $\mu$ M (Figure 1). Lower concentrations of 10 and  
415 30  $\mu$ M are within the normal range of intracellular manganese (Bowman and Aschner, 2014),  
416 whereas 100  $\mu$ M falls within the pathological range (Gandhi et al., 2018). Acute exposure to  
417 manganese increased the spontaneous firing frequency and suppressed the amplitude of action  
418 potentials (AP) (red arrows) in a concentration-dependent manner. Superimposed representative  
419 traces of spontaneous spikes before (black trace) and after 100  $\mu$ M manganese (red trace) exposure  
420 revealed that manganese increased the firing frequency of dopamine neurons and truncated AP  
421 amplitudes (Figure 2A). The EC<sub>50</sub> for the manganese-mediated increase in firing frequency of  
422 dopamine neurons was determined to be 80.2  $\mu$ M by fitting a concentration-dependent curve using

423 a Hill equation (Figure 2B). While manganese induced a modest membrane depolarization at lower  
424 concentrations ( $P > 0.05$ ), it significantly depolarized membrane potential at the highest  
425 concentration tested in this study (100  $\mu\text{M}$ ), which is consistent with the reported manganese  
426 concentration for *in vitro* studies (Bowman and Aschner, 2014) (Figure 2C; baseline:  $-48.1 \pm 1.2$   
427 mV; 400  $\mu\text{M}$  manganese:  $-41.8 \pm 3.1$  mV;  $t_{(15)} = -2.2$ ,  $p = 0.045$ , two-tailed Student's t tests;  $n = 7$   
428 vs 10). Although manganese markedly suppressed AP amplitude at the lowest dose of 10  $\mu\text{M}$   
429 (baseline:  $37.2 \pm 1.1$  mV; 10  $\mu\text{M}$  manganese:  $31.1 \pm 1.1$  mV;  $t_{(15)} = 3.6$ ,  $p = 0.03$ , two-tailed  
430 Student's t tests;  $n = 11$  vs 6), higher doses of manganese did not further suppress AP amplitude  
431 (Figure 2D). In contrast, manganese did not influence AP half-width at low concentrations, but it  
432 significantly narrowed AP width at 100  $\mu\text{M}$  (Figure 2E, baseline:  $1.5 \pm 0.1$  ms; 100  $\mu\text{M}$  manganese:  
433  $1.15 \pm 0.1$  ms;  $t_{(15)} = 2.2$ ,  $p = 0.04$ , two-tailed Student's t tests;  $n = 10$  vs. 7). Manganese  
434 progressively decreased the coefficient-of-variation (CV) from 50  $\mu\text{M}$ , indicating a reduction in  
435 firing variation evident by the small interspike interval (Figure 2F, baseline:  $1.2 \pm 0.1$ ; 200  $\mu\text{M}$   
436 manganese:  $0.7 \pm 0.1$  ms;  $t_{(22)} = 3.4$ ,  $p = 0.003$ , two-tailed Student's t tests;  $n = 11$  vs 13). These  
437 results suggest manganese can regulate the intrinsic firing behavior of dopamine neurons at both  
438 physiological and pathophysiological concentrations in a concentration-dependent manner. To  
439 address the pathological effects of manganese, 100  $\mu\text{M}$  was used for the rest of the study based on  
440 the determined  $\text{EC}_{50}$  in Figure 2B.

441

442 **Manganese-stimulation of neuronal activity increased the release of fluorescent false**  
443 **neurotransmitter (FFN200).** Next, we asked whether manganese-stimulation of firing frequency  
444 of dopamine neurons leads to increased neurotransmitter release. To do this, we utilized FFN200,  
445 a fluorescent substrate of VMAT2 that selectively traces monoamine exocytosis in both neuronal

446 culture and striatal slices (Pereira et al., 2016). “De-staining” of FFN200 associated with  
447 monoamine vesicular release has been used as a surrogate for neurotransmitter release (Pereira et  
448 al., 2016). Consistent with a previous report (Pereira et al., 2016), we found following vehicle  
449 (aCSF) application there is a time-dependent and slow de-staining of FFN200 at striatal dopamine  
450 terminals (Supplemental Figure 1), suggesting a direct correlation between spontaneous firing  
451 activity of dopamine neurons and neurotransmitter release. Manganese increased FFN200 release  
452 as measured by increased rate and magnitude of fluorescence de-staining (see supplemental movie  
453 1). These data suggest manganese-stimulation of neuronal activity correlates with increased  
454 neurotransmitter release (see yellow arrows in Supplemental Figure 1, mean  $\pm$  SEM,  $F_{(1,148)} = 70.2$ ,  
455 †:  $p < 0.01$ , one-way ANOVA followed by Tukey's test,  $n = 4$  slices / group). Additional control  
456 experiments were performed when the release of FFN200 is inhibited. Since blockade of  
457 dopamine transporter (DAT) decreases firing activity of dopamine neurons (Saha et al., 2014; Lin  
458 et al., 2016), theoretically, it should decrease the de-staining rate or even increase the fluorescent  
459 punctate due to accumulation of FFN200-filled synaptic vesicles in the terminal regions. As shown  
460 in Supplemental Figure 1, treatment with DAT inhibitor nomifensine (5  $\mu$ M) produced a plateau  
461 in the fluorescent signal followed by increased fluorescent levels, suggesting inhibition of  
462 neurotransmitter release. These data further support the findings that manganese treatment  
463 increases the activity of dopaminergic neurons.

464

465 **Removal of extracellular  $Ca^{2+}$  did not prevent manganese stimulation of spontaneous spike**  
466 **frequency.** Our observed broad action potentials and slow autonomous pacemaking activities are  
467 consistent with typical electrophysiological features in dopamine neurons (Bean, 2007). Numerous  
468 studies have shown that slow rhythmic spiking is accompanied by large oscillations in intracellular

469  $\text{Ca}^{2+}$  concentrations that are driven by the opening of voltage-dependent  $\text{Ca}^{2+}$  channels (Guzman  
470 et al., 2009; Mercuri et al., 1994; Nedergaard et al., 1993; Puopolo et al., 2007). Therefore, next  
471 we measured manganese-regulation of the spontaneous firing activity of dopamine neuron in  $\text{Ca}^{2+}$ -  
472 free extracellular solution. Unexpectedly, removal of extracellular  $\text{Ca}^{2+}$  did not prevent  
473 manganese-stimulation of the firing frequency (Figure 3A, C; baseline:  $1.3 \pm 0.2$  Hz vs. manganese  
474 in  $\text{Ca}^{2+}$ -free:  $6.5 \pm 1.1$  Hz;  $F_{(2,18)} = 20.9$ ,  $p = 0.000002$ , one-way ANOVA followed by Tukey's  
475 test;  $n = 7$  / group).  $\text{Ca}^{2+}$ -free solution containing manganese did not change the membrane  
476 potential (Figure 3D), AP half-width (Figure 3E), or CV (Figure 3G); however, it significantly  
477 truncated the amplitude of AP (Figure 3F; baseline:  $45.4 \pm 2.2$  mV vs. manganese in  $\text{Ca}^{2+}$ -free:  
478  $37.9 \pm 0.7$  mV;  $F_{(2,18)} = 16.1$ ,  $p = 0.0001$ , one-way ANOVA followed by Tukey's test;  $n = 7$  /  
479 group). In the absence of manganese, comparison of the firing activity before and after perfusion  
480 of a  $\text{Ca}^{2+}$ -free external solution revealed a reduction in the firing frequency (Figure 3C,  $0.5 \pm 0.03$   
481 Hz), broadening of AP half-width (Figure 3E: baseline:  $1.6 \pm 0.08$  ms vs  $\text{Ca}^{2+}$ -free:  $2.9 \pm 0.2$  ms,  
482  $F_{(2,18)} = 35.9$ ,  $p = 0.0001$ , one-way ANOVA followed by Tukey's test;  $n = 7$  / group), truncated AP  
483 amplitude (Figure 3F,  $32.5 \pm 2.0$  mV,  $n = 7$  / group), and an increased CV (Figure 4G, baseline:  
484  $1.1 \pm 0.2$  vs  $\text{Ca}^{2+}$ -free:  $1.99 \pm 0.3$ ,  $F_{(2,18)} = 7.3$ ,  $p = 0.004$ , one-way ANOVA followed by Tukey's  
485 test;  $n = 7$  / group). These results suggest that manganese stimulation of neuronal activity it is not  
486 dependent on extracellular  $\text{Ca}^{2+}$  influx into the dopamine neuron.

487

488 **Combined application of  $\text{Ca}^{2+}$ -free external solution and chelation of intracellular  $\text{Ca}^{2+}$  did**  
489 **not prevent manganese-stimulation of firing frequency.** Since excluding extracellular  $\text{Ca}^{2+}$   
490 ( $\text{Ca}^{2+}$ -free external solution) did not decrease the effect of manganese on the spontaneous firing  
491 activity of dopamine neurons, AP half-width, amplitude, and CV (Figure 3), we asked whether

492 manganese promotes neuronal activation by increasing intracellular  $\text{Ca}^{2+}$  concentrations ( $[\text{Ca}^{2+}]_i$ )  
493 (Tjalkens et al., 2006). To test this, neurons were pretreated with BAPTA-AM (10 mM), a  
494 membrane permeable  $\text{Ca}^{2+}$  chelator, to deplete  $[\text{Ca}^{2+}]_i$  followed by application of manganese in  
495 the presence of  $\text{Ca}^{2+}$ -free external solution. Consistent with previous reports (Benedetti et al., 2011;  
496 Torkkeli et al., 2012), BAPTA pretreatment prior to bath application of manganese in  $\text{Ca}^{2+}$ -free  
497 external solution (denoted in blue) depolarized the membrane potential (Figure 4D, baseline: -  
498  $54.9 \pm 1.3$  mV vs. 100  $\mu\text{M}$  manganese:  $-49.6 \pm 1.9$  mV;  $F_{(2,27)} = 2.5$ ,  $p = 0.028$ , one-way ANOVA  
499 followed by Tukey's test;  $n = 9$  / group) and broadened the AP half-width (Figure 4B, E baseline:  
500  $1.37 \pm 0.2$  ms vs. 100  $\mu\text{M}$  manganese:  $2.50 \pm 0.3$  ms;  $F_{(2,24)} = 3.5$ ,  $p = 0.009$ , one-way ANOVA  
501 followed by Tukey's test;  $n = 10$  / group). Interestingly, we found that manganese treatment in  
502  $\text{Ca}^{2+}$ -free external solution (denoted in red) still increased the spontaneous firing activity of the  
503 neurons (Figure 4A, C, baseline:  $0.9 \pm 0.2$  Hz vs. 100  $\mu\text{M}$  manganese:  $6.9 \pm 1.7$  Hz,  $F_{(2,26)} = 13.2$ ,  
504  $p = 0.003$ , one-way ANOVA followed by Tukey's test;  $n = 10$  / group) and truncated the amplitude  
505 of APs (Figure 4B, F; baseline:  $37.5 \pm 1.4$  mV vs. 100  $\mu\text{M}$  manganese:  $29.0 \pm 1.7$  mV;  $F_{(2,24)} =$   
506  $6.0$ ,  $p = 0.001$ , one-way ANOVA followed by Tukey's test;  $n = 9$  / group). Washout of extracellular  
507 manganese in neurons pretreated with BAPTA and recorded in  $\text{Ca}^{2+}$ -free external solution  
508 (denoted in green) exhibited a significant decrease in the firing frequency (Figure 4C,  $0.4 \pm 0.08$   
509 Hz), a broadening of AP half-width (Figure 4B, E:  $2.4 \pm 0.4$  ms,  $F_{(2,24)} = 4.3$ ,  $p = 0.029$ , one-way  
510 ANOVA followed by Tukey's test;  $n = 9$  / group), and truncated AP amplitude (Figure 4B, F,  $31.7$   
511  $\pm 2.1$  mV,  $F_{(2,24)} = 6.0$ ,  $p = 0.028$ , one-way ANOVA followed by Tukey's test;  $n = 9$  / group). These  
512 results suggest manganese-enhancement of firing frequency of dopamine neurons (Figure 1-3) is  
513 not due to the release of  $\text{Ca}^{2+}$  from intracellular stores.

514

515 **Manganese does not affect intracellular Ca<sup>2+</sup> homeostasis in midbrain dopamine neurons.**

516 To directly examine the effect of manganese exposure on [Ca<sup>2+</sup>]<sub>i</sub> in dopamine neurons, we  
517 measured Ca<sup>2+</sup> responses in the midbrain slices from mice conditionally expressing GCaMP6f in  
518 dopaminergic neurons. Brain slices were continuously perfused with aCSF containing manganese  
519 or N-Methyl-d-aspartate (NMDA) equilibrated with 95% O<sub>2</sub>-5% CO<sub>2</sub>. Since NMDA receptors are  
520 Ca<sup>2+</sup>-permeable glutamate receptors (Choi, 1987; Wild et al., 2014), 100 μM NMDA was used as  
521 a positive control. Representative two-photon Ca<sup>2+</sup> images are shown in Figure 5, where images  
522 for manganese (Figure 5A) or NMDA (Figure 5B) were taken for 10 min after 10 min of baseline  
523 imaging. We found manganese exposure (100 μM) did not significantly alter [Ca<sup>2+</sup>]<sub>i</sub> compared to  
524 vehicle control. In contrast, 100 μM NMDA markedly increased [Ca<sup>2+</sup>]<sub>i</sub> in the neurons. The  
525 relative intensity of two-photon Ca<sup>2+</sup> signaling over baseline over time is shown in Figure 5C, and  
526 supplemental movie 2, and 3. The signal intensity was not affected by manganese administration  
527 (black) [Ca<sup>2+</sup>]<sub>i</sub> whereas NMDA (red) robustly increased the GCaMP6f response, especially in  
528 neurons with low baseline fluorescence ( $F_{(1,592)} = 115.1$ , †:  $p < 0.001$ , one-way ANOVA followed  
529 by Tukey's test,  $n$ : Mn = 10; NMDA = 11). In complement, ratiometric Ca<sup>2+</sup> imaging using FURA-  
530 2 AM in cultured dopamine neurons confirmed the findings that manganese does not affect  
531 intracellular Ca<sup>2+</sup> homeostasis in primary culture midbrain dopamine neurons (Supplemental  
532 Figure 2). Collectively, the lack of effect of manganese on Ca<sup>2+</sup> homeostasis both in midbrain  
533 slices and culture is consistent with the notion that the effects of manganese on dopamine neurons  
534 are not a result of Ca<sup>2+</sup> modulation.

535

536 **Cadmium blockade of voltage-gated Ca<sup>2+</sup> channels inhibited manganese-stimulation of**  
537 **spontaneous firing activity of dopamine neurons.** Thus far, above data suggest manganese

538 enhances the spontaneous activity of midbrain dopamine neurons, but rhythmic spiking changes  
539 during administration of manganese are unlikely to involve extracellular  $\text{Ca}^{2+}$  influx or cytosolic  
540  $\text{Ca}^{2+}$  release from intracellular stores. To further corroborate whether or not manganese augments  
541 the spontaneous activity of dopamine neurons through  $\text{Ca}^{2+}$  channels, we examined the effect of a  
542 nonselective  $\text{Ca}^{2+}$  channel blocker, cadmium ( $\text{Cd}^{2+}$ , 100  $\mu\text{M}$ ) on the intrinsic firing behaviors of  
543 dopamine neurons following manganese exposure. As shown in Figure 6, nonselective blockade  
544 of  $\text{Ca}^{2+}$  channels by bath application of  $\text{Cd}^{2+}$  suppressed the spontaneous firing rate of dopamine  
545 neurons (Figure 6A). Unexpectedly, we found under this condition, manganese application failed  
546 to enhance the firing frequency (Figure 6A, C:  $F_{(2,18)} = 8.3$ ,  $p = 0.002$ , one-way ANOVA followed  
547 by Tukey's test,  $n = 7$  group). Treatment with  $\text{Cd}^{2+}$  alone or the co-administration of  $\text{Cd}^{2+}$  and  
548 manganese did not change the membrane potential (Figure 6D), AP half-width (Figure 6B, E), and  
549 AP half-amplitude (Figure 6B, F), but as expected significantly increased the CV (Figure 6G:  $F_{(2,18)}$   
550  $= 4.6$ ,  $p = 0.024$ , one-way ANOVA followed by Tukey's test,  $n = 7$  group). These findings suggest  
551 that despite observations that manganese-mediated increase in firing activity of dopamine neurons  
552 is not dependent on extracellular or intracellular  $\text{Ca}^{2+}$  flux, it is dependent on  $\text{Ca}^{2+}$  channels  
553 expressed on dopamine neurons.

554

555 The  $\text{Ca}^{2+}$  current involved in pace-making activity is partly due to L-type currents, which are  
556 activated at subthreshold potential which might contribute to tonic firing (Putzier et al., 2009). To  
557 investigate the possible role of these channels, we asked whether nifedipine-blockade of L-type  
558  $\text{Ca}^{2+}$  ( $\text{Ca}_v1$ ) channels inhibited manganese-stimulation of spontaneous firing activity of dopamine  
559 neurons. As shown in Figure 7, we found nifedipine inhibited manganese-stimulation of  
560 spontaneous firing activity. Consistent with the results in Figure 3-4, the firing frequencies were



561 increased in the presence of manganese and  $\text{Ca}^{2+}$ -free condition. Similar to the  $\text{Cd}^{2+}$ -inhibition of  
562 manganese-stimulation of firing activity of dopamine neurons, co-application of nifedipine  
563 inhibited the manganese-stimulation of firing activity (Figure 7A, C:  $F_{(2,18)} = 44.4$ ,  $p = 0.0006$ ,  
564 one-way ANOVA followed by Tukey's test,  $n = 7$  group). Similar to  $\text{Cd}^{2+}$ , the manganese in  $\text{Ca}^{2+}$ -  
565 free solution condition or the co-administration of manganese plus nifedipine in  $\text{Ca}^{2+}$ -free solution  
566 did not change the membrane potential (Figure 5D) or AP half-width (Figure 5B, E), but both  
567 manganese in  $\text{Ca}^{2+}$ -free solution and additional application of nifedipine largely truncated AP  
568 amplitudes (Figure 7A, F:  $F_{(2,18)} = 11.80$ ,  $p = 0.001$ , one-way ANOVA followed by Tukey's test,  $n$   
569 = 7 group). The co-administration of manganese in  $\text{Ca}^{2+}$ -free manganese and nifedipine  
570 significantly increased the CV (Figure 7G:  $F_{(2,18)} = 14.11$ ,  $p = 0.0016$ , one-way ANOVA followed  
571 by Tukey's test,  $n = 7$  group). These unexpected results support the interpretation that manganese  
572 may influx into the neurons through the nifedipine-sensitive voltage-gated  $\text{Ca}^{2+}$  channels.

573

574 **Single neuron recording revealed manganese competes with  $\text{Ca}^{2+}$  influx and generates  $\text{Ca}^{2+}$**   
575 **channel-like currents.** Because the blockade of voltage-gated  $\text{Ca}^{2+}$  channels prevented the  
576 manganese-mediated increases in the spontaneous firing activity of dopamine neurons independent  
577 of the presence of intracellular or extracellular  $\text{Ca}^{2+}$ , we then examined the hypothesis that voltage-  
578 gated  $\text{Ca}^{2+}$  channels on dopamine neurons were directly permeable to extracellular manganese.  
579 After replacing external  $\text{Ca}^{2+}$  with equimolar manganese, we observed manganese induced a  $\text{Ca}^{2+}$   
580 channel-mediated current, which was evoked by a series of 200 ms depolarizing steps from  $-60$  to  
581  $+85$  mV in 5 mV increments (Figure 8A<sub>1</sub>). The currents were composed of a rapidly inactivating  
582 transient component and a slowly inactivating persistent component. The current-voltage  
583 relationship of the manganese current is shown in Figure 8B. The manganese currents were

584 activated at voltages around 20 mV and peaked at approximately 30 mV. Next, we asked whether  
585 the activity of Ca<sup>2+</sup> channels in midbrain dopamine neurons is affected by these manganese-  
586 mediated currents. Since there is little information on whether manganese modulates Ca<sup>2+</sup> currents  
587 in dopamine neurons, we focused on the action of manganese on whole-cell Ca<sup>2+</sup> currents. Total  
588 Ca<sup>2+</sup> currents (Figure 8A<sub>2</sub>, C) were activated at voltages around 20 mV and peaked at  
589 approximately 45 mV. Bath application of 100 μM manganese suppressed the peak amplitude of  
590 total Ca<sup>2+</sup> currents (Figure 8A<sub>3</sub>, C, \**p* < 0.05, two-tailed Student's *t* tests; *n* = 7 / group). These data  
591 suggest in dopamine neurons, manganese might compete with Ca<sup>2+</sup> influx and generate Ca<sup>2+</sup>  
592 channel-gated-like currents that in turn alter the activity of the neurons. To our knowledge, these  
593 are the first reported findings that Ca<sup>2+</sup> channels may be directly permeable to manganese and may  
594 represent a distinct role of manganese in regulating neuronal activity.

595  
596 **Manganese-enhanced magnetic resonance imaging provides evidence for an Ca<sup>2+</sup>-channel**  
597 **dependent mechanism in the midbrain *in vivo*.** To further examine the manganese interaction  
598 with Ca<sup>2+</sup> channels, we asked whether manganese can influx into the Ca<sub>v</sub>1.2 and Ca<sub>v</sub>1.3 expressing  
599 cells and whether nifedipine inhibits manganese influx through Ca<sub>v</sub>1 channels. To examine this  
600 hypothesis *in vivo*, we performed manganese enhanced magnetic resonance imaging (MEMRI) in  
601 animals pretreated with saline or manganese. I.p. injections of 70 mg/kg manganese has previously  
602 been shown to significantly increase manganese levels in the basal ganglia (Dodd et al., 2005),  
603 and also is a side-effect of contrast agent for MRI (Poole et al., 2017). Manganese frequently serves  
604 as a neuronal contrast agent to enhance functional brain mapping at a higher spatial resolution than  
605 typical fMRI studies (Lee et al., 2005). In this study, we utilized MEMRI and T<sub>1</sub> mapping to study  
606 basal levels of brain activity before and after nifedipine-blockade of voltage-gated Ca<sup>2+</sup> channels

607 (Figure 9 and Supplemental Figure 3). A commonly used concentration of nifedipine (15 mg/kg)  
608 (Morellini et al., 2017, Giordano et al., 2010) was injected before 30 min of manganese exposure.  
609 As expected, we found that  $T_1$  relaxation (quantified as  $R_1$  or the rate of  $T_1$  relaxivity in  $s^{-1}$ )  
610 following manganese treatment exhibited predominantly higher (faster)  $R_1$  in ventral tegmental  
611 area (VTA) and substantia nigra (SN) compared to other cortical and subcortical regions  
612 (Supplemental Figure 3,  $F_{(8,72)} = 2.35$ ,  $p = 0.026$ , one-way ANOVA followed by Tukey's test, test,  
613  $n = 8 - 9$  / group). This reflects a shortening of VTA and SN  $T_1$  relaxation time due to the  
614 accumulation of the paramagnetic manganese. Importantly, and consistent with single neuron  
615 recordings (Figure 6, 7, and 8), we observed that nifedipine-blockade of L-type  $Ca^{2+}$  channels  
616 reduced  $T_1$  shortening effects of manganese in dopaminergic midbrain regions (Fig 9, VTA:  $t_{(15)}$   
617  $= -2.2$ ,  $p = 0.04$ , two-tailed Student's t tests; Sn:  $t_{(15)} = -2.7$ ,  $p = 0.015$ , two-tailed Student's t tests;  
618  $n = 8 - 9$  / group). This was observed as a slower rate  $R_1$  in the nifedipine/manganese group  
619 relative to manganese only. Therefore, both *in vitro* (single neurons recording) and *in vivo* studies  
620 suggest that nifedipine decreases manganese-stimulation of neuronal activity and its accumulation  
621 in the multiple brain regions including the dopamine neuron enriched midbrain.

622

623 **Manganese influxes into  $Ca_v1.2$  and  $Ca_v1.3$  expressing cells in a nifedipine-dependent**  
624 **manner.** Our data so far supports the interpretation that manganese may influx via nifedipine-  
625 sensitive  $Ca^{2+}$  channels. To examine this idea directly in a reduced system, HEK cells were  
626 transiently transfected with either a control empty vector or  $Ca_v1.2$  or  $Ca_v1.3$  cDNA. Western blot  
627 analysis confirmed the greater expression of  $Ca_v1.2$  or  $Ca_v1.3$  in the transfected cells (Figure 10A).  
628 Overexpression of  $Ca_v1.2$  increased the uptake of  $^{54}Mn$  at 5 and 15 min after the addition of  $^{54}Mn$ ,  
629 while there was no difference observed between the  $Ca_v1.3$  expressing and control cells (Figure

630 10B). Uptake of  $^{54}\text{Mn}$  by HEK cells overexpressing  $\text{Ca}_v1.2$  was inhibited by pretreating with  
631 nifedipine (Figure 10C). These findings support the interpretation that manganese regulates  
632 dopamine neuronal activity and manganese influx via a nifedipine-sensitive  $\text{Ca}_v1.2$ -channel-  
633 mediated mechanism.

634

635 **In silico modeling support the possibility that manganese can interact with the  $\text{Ca}^{2+}$  binding**  
636 **site in the  $\text{Ca}_v1$  channel.** Because the crystal structure for  $\text{Ca}_v1.2$  is not available,  $\text{Ca}_v1.1$  was  
637 used for the homology modeling studies to investigate whether the putative structure of  $\text{Ca}_v1.2$   
638 could inform us about the manganese cation transport. First, the available electron microscopy  
639 structure for the homologous  $\text{Ca}_v1.1$  channel was used to build a homology model using the  
640 SWISS-MODEL program (Figure 11) (Waterhouse et al., 2018). The helical regions of the mouse  
641  $\text{Ca}_v1.1$  structure (Wu et al., 2016) and the helical regions for the  $\text{Ca}_v1.2$  model were compared by  
642 protein BLAST (Altschul et al., 1990) and found to be 72% identical and 81% similar. Further,  
643 when all amino acids within 7 Å of the bound  $\text{Ca}^{2+}$  atom found in the  $\text{Ca}_v1.1$  structure were selected  
644 and compared to amino acids in the model structure for  $\text{Ca}_v1.2$ , we found 100% identity in this  
645 region, including the carboxylate ligands for the  $\text{Ca}^{2+}$  atom. We conclude the  $\text{Ca}_v1.2$  channel has  
646 an extremely similar structure and presumably cation-binding capability when compared with  
647  $\text{Ca}_v1.1$ . Because the ionic radius of  $\text{Mn}^{2+}$  is smaller than for  $\text{Ca}^{2+}$  (Persson, 2010), it should be  
648 adequately accommodated by the channel. Taken together, the structural features of the  $\text{Ca}_v1.2$   
649 channel and our experimental findings argue for the possibility of the  $\text{Ca}_v1.2$  channel conducting  
650 a manganese ion. While these data collectively suggest manganese produces a  $\text{Ca}^{2+}$  channel-  
651 mediated current in dopamine neurons, which increases rhythmic firing activity of dopamine  
652 neurons, the connection between manganese-mediated current and increased firing activity of

653 dopamine neurons remain unclear. The next set of experiments are designed to determine the  
654 mechanism.

655

656 **Blockade of large-conductance Ca<sup>2+</sup>-activated potassium (BK) channels decreased the**  
657 **spontaneous firing activity and prevented manganese-stimulation of firing frequency.**

658 Previously, we have shown that paxilline-blockade of BK channels reduces the spontaneous firing  
659 activity, broadens the width and enhances the amplitude of action potentials in midbrain dopamine  
660 neurons (Lin et al., 2016). Since Mn increased the firing frequency, decrease the width and the  
661 amplitude of action potentials (Figure 1), we postulated that manganese-stimulation of the firing  
662 frequency, narrowing of action potential width and reduction of action potential amplitude might  
663 be due to BK channel activation. Consistent with our previous reports, paxilline suppressed the  
664 firing frequency of midbrain dopamine neurons (Figure 12A, B). Pre-treatment with paxilline  
665 abolished the manganese-induced increase in firing frequency (Figure 12A, C: baseline:  $1.5 \pm 0.2$   
666 Hz vs. Mn + paxilline:  $0.51 \pm 0.1$  Hz;  $F_{(2,20)} = 11.2$ ,  $p = 0.0005$ , one-way ANOVA followed by  
667 Tukey's test;  $n = 8$  / group) and inhibited manganese's modulation of action potential amplitude  
668 (Figure 12A, F). Comparison of the firing frequency after treatment with paxilline alone or  
669 paxilline + manganese treatment revealed a further reduction in the firing frequency (Figure 12C;  
670 paxilline:  $0.81 \pm 0.1$  Hz). Consistent with our previous report (Lin et a., 2016), blockade of BK  
671 channels depolarized membrane potential (Figure 12D; Baseline:  $-45.1 \pm 1.6$  mV vs paxilline: -  
672  $40.1 \pm 1.8$  mV;  $F_{(2,21)} = 3.5$ ,  $p = 0.04$ , one-way ANOVA followed by Tukey's test;  $n = 8$  / group),  
673 broadened AP half-width (Figure 12B, E: baseline:  $1.3 \pm 0.1$  ms vs. paxilline:  $1.8 \pm 0.2$  ms; ;  $F_{(2,21)}$   
674  $= 5.9$ ,  $p = 0.009$ , one-way ANOVA followed by Tukey's test;  $n = 8$  / group), increased action  
675 potential amplitude (Figure 12B, F; baseline:  $28.1 \pm 1.6$  mV vs. paxilline:  $32.6 \pm 1.1$  mV;  $F_{(2,21)}$

676 = 6.6,  $p = 0.005$ , one-way ANOVA followed by Tukey's test;  $n = 8$  / group) and increased the CV  
677 (Figure 12G; baseline:  $1.8 \pm 0.2$  vs. paxilline:  $2.8 \pm 0.3$ ;  $F_{(2,21)} = 2.8$ ,  $p = 0.015$ , one-way ANOVA  
678 followed by Tukey's test;  $n = 8$  / group). After pretreatment with paxilline, we found manganese  
679 did not reverse paxilline-induced membrane depolarization (Figure 12D), but it did diminish the  
680 effects of paxilline on the action potential half-width (Figure 12E), amplitude (Figure 12F) and  
681 CV (Figure 12G). These results suggest that the manganese-stimulation of spontaneous spike  
682 activity of dopamine neurons is possibly due to BK channels activation.

683

684 **Manganese increases membrane expression of BK- $\alpha$  subunits.** The BK- $\alpha$  subunit is the pore-  
685 forming unit of the BK channel (Knaus et al., 1994). There is a direct relationship between BK  
686 channel regulation of neuronal excitability and the level of BK- $\alpha$  subunits at the surface membrane  
687 (Shruti et al., 2012; Chen et al., 2013; Cox et al., 2014). Since blockade of BK channels abolished  
688 the effect of manganese-stimulation of the spontaneous firing frequency of dopamine neurons, we  
689 examined the possibility that manganese-mediated enhancement of neuronal excitability is due to  
690 increased BK- $\alpha$  subunit levels at the plasma membrane. To test this, we used TIRF microscopy to  
691 monitor fluorescently-tagged BK channel trafficking. The TIRF profile of GFP- $\alpha$  subunits was  
692 examined in HEK293 cells expressing GFP- $\alpha$  subunits in the presence or absence of 100  $\mu$ M  
693 manganese. As shown in Figure 13 and supplemental movie 4, the GFP- $\alpha$  subunits' fluorescence  
694 signal at the membrane remained stable in the vehicle (external solution)-treated control group.  
695 The TIRF profile of GFP- $\alpha$  subunits was markedly increased following manganese treatment  
696 ( $F_{(1,164)} = 163.8$ ,  $\dagger$ :  $p < 0.01$ , one-way ANOVA followed by Tukey's test,  $n$ : baseline = 7; Mn = 8).  
697 Because TIRF microscopy detects fluorophores at or near the plasma membrane, these results  
698 indicate that manganese's stimulation of neuronal excitability is, in part, due to manganese-

699 induced increases in surface BK channel expression and thus activity. To test this possibility, we  
700 used excised inside-out patches to record currents in response to test voltage steps. Figure 14 shows  
701 representative BK currents in response to test voltage steps in the absence or presence of  
702 manganese. The I–V curves of these recordings demonstrate Mn significantly increased peak  
703 amplitude of BK currents ( $p < 0.05$ , two-tailed Student's *t* tests,  $n = 6$  / group). Taken together,  
704 these results suggest manganese enhances BK channel activity that we have previously shown  
705 increases firing activity of dopamine neurons (Lin 2016).

706

707

## 708 **Discussion**

709

710 Prolonged exposure to low levels of manganese or single large exposure results in its accumulation  
711 in multiple brain regions leading to dysfunction of central nervous system and an extrapyramidal  
712 motor disorder referred to as manganism (Aschner et al., 2009). In this study, we used multiple  
713 complementary approaches to examine the manganese-regulation of dopaminergic excitability and  
714 to determine the potential mechanisms involved. We found manganese increased the spontaneous  
715 firing activity of dopamine neurons, decreased the amplitude and half-width of action potentials,  
716 and reduced the variation of interspike interval. Unexpectedly, neither the removal of extracellular  
717  $\text{Ca}^{2+}$  and/or the chelation of intracellular  $\text{Ca}^{2+}$  modulated the manganese-stimulation of  
718 spontaneous firing frequency of dopamine neurons. Live cell two-photon imaging of GCaMP6f  
719 expressing dopamine neurons support the electrophysiology data showing no change in  
720 intracellular  $\text{Ca}^{2+}$  levels after manganese application. In contrast, we found manganese-regulation  
721 of dopamine neurons was blocked by cadmium, a nonselective  $\text{Ca}^{2+}$  channel blocker or by

722 nifedipine, an L-type  $\text{Ca}^{2+}$  channel blocker, suggesting manganese can potentially influx through  
723 voltage-gated  $\text{Ca}^{2+}$  channels. Furthermore, we identified a  $\text{Ca}^{2+}$  channel-mediated manganese  
724 current that reduced voltage-gated  $\text{Ca}^{2+}$  currents, supporting the idea that manganese may compete  
725 with  $\text{Ca}^{2+}$  influx, leading to activation of BK channels and increased spontaneous firing activity of  
726 dopamine neurons.

727

728 **Manganese competes with  $\text{Ca}^{2+}$  entry through voltage-gated  $\text{Ca}^{2+}$  channels to enhance**  
729 **excitability of dopamine neurons.** The action potential of dopamine neurons is slow and broad,  
730 which maximizes  $\text{Ca}^{2+}$  entry and promotes slow rhythmic activity (Bean, 2007). The slow,  
731 rhythmic activity (2–10 Hz) in these neurons is autonomously generated and accompanied by slow  
732 oscillations in intracellular  $\text{Ca}^{2+}$  concentration that are triggered by the opening of plasma  
733 membrane  $\text{Ca}_v1$  ( $\text{Ca}_v1.2$ ,  $\text{Ca}_v1.3$ )  $\text{Ca}^{2+}$  channels and release of  $\text{Ca}^{2+}$  from intracellular, endoplasmic  
734 reticulum stores (Guzman et al., 2009; Morikawa and Paladini, 2011; Nedergaard et al., 1993;  
735 Puopolo et al., 2007). Thus, we tested the hypothesis that manganese increases  $\text{Ca}^{2+}$  entry into the  
736 neuron and/or releases  $\text{Ca}^{2+}$  from intracellular  $\text{Ca}^{2+}$  stores. Unexpectedly, our data support neither  
737 of these possibilities. We found performing the experiments in either extracellular  $\text{Ca}^{2+}$ -free  
738 condition or chelation of intracellular  $\text{Ca}^{2+}$  did not impair manganese-stimulation of firing  
739 frequency or reduction of action potential amplitude. Consistently, live cell two-photon  $\text{Ca}^{2+}$   
740 imaging showed manganese did not alter intracellular  $\text{Ca}^{2+}$  concentration in the midbrain  
741 dopamine neurons. Thus, although manganese has been previously shown to regulate  $\text{Ca}^{2+}$   
742 homeostasis in astrocytes (Xu et al., 2009), this effect is not present in dopamine neurons. Previous  
743 studies suggest manganese can enter cells through a number of transporters (Gunshin, 1997;  
744 Lockman et al., 2001; Crossgrove and Yokel, 2005; Goytain et al., 2008; Itoh et al., 2008; Gunter



745 et al., 2013). In addition, as a divalent cation, manganese may potentially target  $\text{Ca}^{2+}$  channels,  
746 which are also permeant to other divalent cations such as barium (Bourinet et al., 1996). Therefore,  
747 if manganese competes with  $\text{Ca}^{2+}$  entry at the level of voltage-gated  $\text{Ca}^{2+}$  channels, then a  
748 nonselective  $\text{Ca}^{2+}$  channel blocker such as cadmium ( $\text{Cd}^{2+}$ ) or a L-type  $\text{Ca}^{2+}$  channel nifedipine  
749 should block the effect of manganese on the firing frequency of dopamine neurons and action  
750 potential morphology. As shown in Figure 6 and 7, both of  $\text{Cd}^{2+}$  and nifedipine suppressed  
751 manganese-stimulation of spontaneous firing activities, which is consistent with recent reports  
752 showing dihydropyridine L-type channel inhibitors slow pacemaker activity of dopamine neurons  
753 at submicromolar concentrations (Nedergaard et al., 1993; Puopolo et al., 2007).

754

755 **Blockade of L-type  $\text{Ca}^{2+}$  (Cav1) channels decreases manganese influx.** Since the 1980s,  
756 manganese has been used as a tool to increase the signal to noise ratio in magnetic resonance  
757 imaging (MRI) (Lauterbur et al., 1980). Consistent with previous reports (Aoki et al., 2004; Lee  
758 et al., 2005), following systemic manganese administration, manganese is accumulated in multiple  
759 brain regions including dopaminergic neuron enriched brain regions such as substantia nigra and  
760 ventral tegmental area (Figure 9 and Supplemental Figure 3). Here we found, nifedipine-blockade  
761 of L-type  $\text{Ca}^{2+}$  channels decreased manganese accumulation in several brain regions as well as  
762 manganese uptake in the  $\text{Ca}_v1.2$  expressing HEK cells. These data support the interpretation that  
763 manganese might be permeable through the  $\text{Ca}^{2+}$  channels. Consistent with this idea, the chemical  
764 properties of aqueous  $\text{Ca}^{2+}$  and  $\text{Mn}^{2+}$  ions and the smaller ionic radius of  $\text{Mn}^{2+}$  than for  $\text{Ca}^{2+}$  also  
765 support the hypothesis that manganese might be accommodated by the  $\text{Ca}_v1$  channels. While the  
766 crystal structure of  $\text{Ca}_v1.2$  is yet to be determined, *in silico* analyses of the homology model of the  
767 helical regions of the mouse  $\text{Ca}_v1.1$  structure and the helical regions for the  $\text{Ca}_v1.2$  were found to

768 be 72% identical and 81% similar for  $\text{Ca}_v1.2$ ; therefore, it is possible that  $\text{Mn}^{2+}$  enters  $\text{Ca}_v$   
769 expressing cells. Whether manganese is permeable to other  $\text{Ca}^{2+}$  channels in dopamine or other  
770 neuronal types requires further examination.

771

772 Manganese influx through L-type  $\text{Ca}^{2+}$  channels was further supported by our manganese  
773 enhanced magnetic resonance imaging (MEMRI) data (Figure 9). It should be noted that both  
774 neuronal and glial cells express  $\text{Ca}_v1$  channels and therefore the MEMRI and the nifedipine-  
775 inhibition of this response reported in our studies do not distinguish the cell type. While the effect  
776 of manganese on  $\text{Ca}_v1.2$  is consistent across other CNS cell types requires further investigation,  
777 our observations of manganese accumulation in the dopamine enriched brain region and *in vitro*  
778 studies on the effects of manganese on dopaminergic neurons could establish a biological basis for  
779 movement disorders associated with manganism, which typically include symptoms related to  
780 dysregulation of the dopaminergic system. Furthermore, although the MEMRI data suggest acute  
781 manganese exposure can be detected in multiple brain regions, dopaminergic brains regions,  
782 specifically the VTA and SN, displayed a greater enhancement of MRI signal by manganese  
783 compared to other brain regions observed in this study. Overall, we found that blockade of  $\text{Ca}_v1.2$   
784 can decrease manganese regulation of dopamine neuron activity and its accumulation in the brain.

785

786 **Manganese increases membrane expression of BK channels  $\alpha$ -subunit leading to enhanced**  
787 **BK channels activity.** Structurally, BK channel complexes contain the pore-forming  $\alpha$  subunit  
788 (four  $\alpha$  subunits form the channel pore) and the regulatory  $\beta$  subunits (Knaus et al., 1994; Brenner  
789 et al., 2000; Lu et al., 2006). The intrinsic gating properties of BK channels are dynamically  
790 modulated by various kinases (White et al., 1991, Weiger et al., 2002) that regulate BK channels

791 trafficking to the membrane (Chae and Dryer, 2005, Toro et al., 2006). Recently, we have shown  
792 that PKC activation decreases membrane expression of GFP- $\alpha$  subunits of BK channels (Lin et al.,  
793 2016). These data combined with reports showing manganese-activation of protein kinase delta  
794 triggers apoptosis in dopaminergic neurons (Kitazawa et al., 2005), led us to ask whether Mn  
795 increases GFP- $\alpha$  subunit membrane expression. We found manganese enhanced surface trafficking  
796 of BK channels (Fig 13) and increased BK channels activity (Fig 14). These data collectively  
797 describe a cellular mechanism for the paxilline-blockade of Mn-stimulated increases in firing  
798 frequency as well as its effect on the action potential morphology. Future studies will determine  
799 the PKC subtype/s involved in Mn-induced trafficking of GFP- $\alpha$  subunit of BK channels and the  
800 potential involvement of other BK channels subunits such as regulatory  $\beta$  subunits. Collectively,  
801 these findings reveal the cellular mechanism for manganese-regulation of dopamine neurons and  
802 reveal a unique therapeutic target to attenuate the untoward consequence of manganese exposure.

803

#### 804 **Acknowledgements**

805 This study was supported by DA026947, NS071122, OD020026, DA026947S1, DA043895

806 We are very grateful to Dr. Gregory Hockerman for providing plasmids for Ca<sub>v</sub>1.2-GFP and  
807 Ca<sub>v</sub>1.3-GFP, Dr. Richard B. Silverman for providing HEK 293 cells stably expressing Cav1.2 or  
808 1.3 and Dr. Robert Brenner for providing HEK293 cells stably expressing GFP-BK- $\alpha$  subunits.

809

#### 810 **Figure Legends**

811

812 **Figure 1- Manganese increases the spontaneous firing activity of dopamine neurons.** Top:  
813 representative recording showing the dose-dependent effect of  $Mn^{2+}$  on the spontaneous firing  
814 activity of dopamine neurons and firing rate following washout period. Bottom: Histogram of  
815 firing frequency obtained from above trace.

816

817 **Figure 2- Analysis of spontaneous firing activity and properties of action potential following**  
818 **manganese exposure.** **A**, Representative action potential trace before (baseline, black trace) and  
819 after bath application of 100  $\mu M$   $Mn^{2+}$  (red trace). **B**, Dose-response relationships of the  
820 spontaneous firing frequency of dopamine neurons following  $Mn^{2+}$  exposure. A  $EC_{50}$  of 80.2  $\mu M$   
821 was obtained by fitting the dose-dependent curve using a Hill equation. **C**,  $Mn^{2+}$  did not  
822 significantly change membrane potential. **D**,  $Mn^{2+}$  suppressed the amplitude of action potential (as  
823 measured as the half amplitude) at all concentrations examined (baseline:  $37.2 \pm 1.1$  mV; 10  $\mu M$   
824 manganese:  $31.1 \pm 1.1$  mV;  $t_{(15)} = 3.6$ ,  $p = 0.03$ , two-tailed Student's t tests;  $n = 11$  vs 6). **E**,  $Mn^{2+}$   
825 did not change the half-width of action potential at 10-50  $\mu M$ , but it significantly narrowed the  
826 half-width at 100  $\mu M$  (baseline:  $1.5 \pm 0.1$  ms; 100  $\mu M$  manganese:  $1.15 \pm 0.1$  ms;  $t_{(15)} = 2.2$ ,  $p =$   
827  $0.04$ , two-tailed Student's t tests;  $n = 10$  vs. 7). **F**,  $Mn^{2+}$  dose-dependently decreased the coefficient-  
828 of-variation of interspike intervals (baseline:  $1.2 \pm 0.1$ ; 200  $\mu M$  manganese:  $0.7 \pm 0.1$ ;  $t_{(22)} = 3.4$ ,  
829  $p = 0.003$ , two-tailed Student's t tests;  $n = 11$  vs 13).

830

831 **Figure 3- Manganese stimulation of firing activity of dopamine neurons is not dependent on**  
832 **extracellular  $Ca^{2+}$ .** **A**, Top: representative spontaneous spike activities of a neuron exposed to  
833  $Mn^{2+}$  in a  $Ca^{2+}$ -free extracellular solution. Middle: histogram of firing frequency obtained from  
834 the above trace showing  $Mn^{2+}$  increased firing frequency. **B**, Superimposed representative single

835 action potential traces shown in **A**, baseline (black trace),  $Mn^{2+}$  +  $Ca^{2+}$ -free solution (red trace),  
836 and  $Ca^{2+}$ -free solution only (green trace). **C**, In  $Ca^{2+}$ -free solution,  $Mn^{2+}$  increased spontaneous  
837 firing rate.  $Mn^{2+}$  washout in  $Ca^{2+}$ -free conditions revealed a reduction of firing rate (baseline:  $1.3$   
838  $\pm 0.2$  Hz vs. manganese in  $Ca^{2+}$  – free:  $6.5 \pm 1.1$  Hz;  $F_{(2,18)} = 20.9$ ,  $p = 0.000002$ , one-way ANOVA  
839 followed by Tukey's test;  $n = 7$  / group). **D**,  $Mn^{2+}$  and  $Ca^{2+}$ -free extracellular solution did not  
840 change membrane potential. **E**, Half-width measured at half-maximal voltage of action potential  
841 was not different between baseline and  $Mn^{2+}$  application, but it was significantly broadened in  
842  $Ca^{2+}$ -free condition as compared to baseline (baseline:  $1.6 \pm 0.08$  ms vs  $Ca^{2+}$  – free:  $2.9 \pm 0.2$  ms,  
843  $F_{(2,18)} = 35.9$ ,  $p = 0.0001$ , one-way ANOVA followed by Tukey's test;  $n = 7$  / group). **F**, Both  $Ca^{2+}$ -  
844 free only and  $Mn^{2+}$  plus  $Ca^{2+}$ -free condition significantly depressed the amplitude of action  
845 potential (baseline:  $45.4 \pm 2.2$  mV vs. manganese in  $Ca^{2+}$  – free:  $37.9 \pm 0.7$  mV;  $F_{(2,18)} = 16.1$ ,  $p =$   
846  $0.0001$ , one-way ANOVA followed by Tukey's test;  $n = 7$  / group). **G**, The coefficients of variation  
847 of the interspike intervals was not different between baseline and Mn plus  $Ca^{2+}$ -free solution  
848 (baseline:  $1.1 \pm 0.2$  vs  $Ca^{2+}$  – free:  $1.99 \pm 0.3$ ,  $F_{(2,18)} = 7.3$ ,  $p = 0.004$ , one-way ANOVA followed  
849 by Tukey's test;  $n = 7$  / group). \* $p < 0.05$ ; \*\* $p < 0.01$ .

850

851 **Figure 4- Manganese increases firing rate in the combined absence of extracellular and**  
852 **intracellular  $Ca^{2+}$ .** **A**, Top: representative trace of spontaneous spike activity following  $Mn^{2+}$   
853 exposure in an  $Ca^{2+}$ -free extracellular solution and an intracellular solution containing the  $Ca^{2+}$   
854 chelator BAPTA (10 mM). Bottom: histogram of firing frequency obtained from above trace  
855 showing  $Mn^{2+}$  increased firing frequency. **B**, Superimposed representative single action potential  
856 traces are shown in **A**: baseline (black trace),  $100 \mu M Mn^{2+}$  +  $Ca^{2+}$ -free + BAPTA (red trace) and  
857  $Ca^{2+}$ -free plus BAPTA-AM (green trace). **C**,  $Mn^{2+}$  increased firing rate even in the combined

858 absence of extracellular and intracellular  $\text{Ca}^{2+}$ ; after  $\text{Mn}^{2+}$  washout, the firing rate decreased under  
859  $\text{Ca}^{2+}$ -free conditions (baseline:  $0.9 \pm 0.2$  Hz vs. 100  $\mu\text{M}$  manganese:  $6.9 \pm 1.7$  Hz,  $F_{(2,26)} = 13.2$ ,  $p$   
860  $= 0.003$ , one-way ANOVA followed by Tukey's test;  $n = 10$  / group). **D**, The combination of  
861 extracellular  $\text{Ca}^{2+}$ -free plus  $\text{Mn}^{2+}$  and intracellular BAPTA containing solution depolarized the  
862 membrane potential. After  $\text{Mn}^{2+}$  washout the membrane potential returned to the baseline level  
863 ( $\text{Ca}^{2+}$ -free conditions) (baseline:  $-54.9 \pm 1.3$  mV vs. 100  $\mu\text{M}$  manganese:  $-49.6 \pm 1.9$  mV;  $F_{(2,27)} =$   
864  $2.5$ ,  $p = 0.028$ , one-way ANOVA followed by Tukey's test;  $n = 9$  / group). **E**, The half-width was  
865 measured at the half-maximal voltage of APs. The half-width was broadened significantly in the  
866 combination of extracellular  $\text{Ca}^{2+}$ -free + intracellular BAPTA containing solution in the absence  
867 or presence of  $\text{Mn}^{2+}$  (baseline:  $1.37 \pm 0.2$  ms vs. 100  $\mu\text{M}$  manganese:  $2.50 \pm 0.3$  ms;  $F_{(2,24)} = 3.5$ ,  
868  $p = 0.009$ , one-way ANOVA followed by Tukey's test;  $n = 10$  / group). **F**, Half-amplitude of action  
869 potential was significantly depressed in the combination of extracellular  $\text{Ca}^{2+}$ -free and intracellular  
870 BAPTA contained solution in the absence or presence of  $\text{Mn}^{2+}$  (baseline:  $37.5 \pm 1.4$  mV vs. 100  
871  $\mu\text{M}$  manganese:  $29.0 \pm 1.7$  mV;  $F_{(2,24)} = 6.0$ ,  $p = 0.001$ , one-way ANOVA followed by Tukey's  
872 test;  $n = 9$  / group). **G**, The coefficients of variation of the interspike intervals were not significantly  
873 different amongst the experimental groups. \* $p < 0.05$ ; \*\* $p < 0.01$ ,  $n = 9 - 10$  per group.

874

875 **Figure 5- Manganese does not alter intracellular  $\text{Ca}^{2+}$  homeostasis.** **A, B**, Representative two-  
876 photon images of GCaMP6f fluorescent neurons in mouse midbrain slices following 100  $\mu\text{M}$   $\text{Mn}^{2+}$   
877 or NMDA treatments. **C**, Analyses of relative fluorescence intensities of GCaMP6 neurons  
878 following 100  $\mu\text{M}$   $\text{Mn}^{2+}$  or NMDA ( $F_{(1,592)} = 115.1$ ,  $\dagger: p < 0.001$ , one-way ANOVA followed by  
879 Tukey's test,  $n$ : Mn = 10 frame (71 neurons) NMDA = 11 frame (50 neurons) from 3 independent  
880 experiments). Scale bar: 50  $\mu\text{m}$ .  $\dagger: p < 0.001$ .

881  
882 **Figure 6- Cadmium blockade of voltage-gated  $\text{Ca}^{2+}$  channels inhibited manganese-**  
883 **stimulation of spontaneous firing activity of dopamine neurons.** *A*, Top: representative  
884 spontaneous spike activity of a dopamine neuron before and after exposure to cadmium ( $\text{Cd}^{2+}$  a  
885 nonselective voltage-gated  $\text{Ca}^{2+}$  channel blocker) and  $\text{Cd}^{2+}$  +  $\text{Mn}^{2+}$ .  $\text{Cd}^{2+}$ -blockade of voltage-  
886 gated  $\text{Ca}^{2+}$  channels inhibited  $\text{Mn}^{2+}$ -stimulation of spontaneous firing activity. Bottom: histogram  
887 of firing frequency from above trace showing firing frequencies were lowered in  $\text{Cd}^{2+}$  only  
888 condition and following or  $\text{Cd}^{2+}$  plus  $\text{Mn}^{2+}$ , but return to baseline after washout. *B*, Superimposed  
889 representative single action potential traces shown in *A*: baseline (black trace), 100  $\mu\text{M}$   $\text{Cd}^{2+}$  (green  
890 trace), 100  $\mu\text{M}$   $\text{Mn}^{2+}$  +  $\text{Cd}^{2+}$  (red trace), and washout (blue trace). *C*, Spontaneous firing rate  
891 significantly decreased following application of  $\text{Cd}^{2+}$  or  $\text{Cd}^{2+}$  plus  $\text{Mn}^{2+}$  ( $F_{(2,18)} = 8.3$ ,  $p = 0.002$ ,  
892 one-way ANOVA followed by Tukey's test,  $n = 7$  / group). *D*, Application of  $\text{Cd}^{2+}$  or  $\text{Cd}^{2+}$  plus  
893  $\text{Mn}^{2+}$  did not change the membrane potential. *E*, Half-width was measured at half-maximal voltage  
894 of action potential; there was no change in the half-width of,  $\text{Cd}^{2+}$  and  $\text{Cd}^{2+}$  plus  $\text{Mn}^{2+}$  experimental  
895 groups. *F*,  $\text{Cd}^{2+}$  or  $\text{Cd}^{2+}$  plus  $\text{Mn}^{2+}$  treatments did not change the amplitude of action potential. *G*,  
896 Both  $\text{Cd}^{2+}$  and  $\text{Cd}^{2+}$  plus  $\text{Mn}^{2+}$  treatments increased the coefficients of variation of the interspike  
897 interval ( $F_{(2,18)} = 4.6$ ,  $p = 0.024$ , one-way ANOVA followed by Tukey's test,  $n = 7$  / group). \* $p <$   
898 0.05; \*\* $p < 0.01$ .

899  
900 **Figure 7- Blockade of L-type  $\text{Ca}^{2+}$  channels inhibited manganese-stimulation of spontaneous**  
901 **firing activity of dopamine neurons.** *A*, Top: representative spontaneous spike activity of a  
902 dopamine neuron before and after exposure to  $\text{Mn}^{2+}$  plus  $\text{Ca}^{2+}$ -free and nifedipine, an L-type  $\text{Ca}^{2+}$   
903 channel blocker. Nifedipine-blockade of voltage-gated  $\text{Ca}^{2+}$  channels inhibited  $\text{Mn}^{2+}$ -stimulation

904 of spontaneous firing activity. Bottom: histogram of firing frequency from above trace showing  
905 firing frequencies were increased in combination of  $Mn^{2+}$  and  $Ca^{2+}$ -free, lowered in additionally  
906 added nifedipine, but return to baseline after washout. **B**, Superimposed representative single  
907 action potential traces shown in A: baseline (black trace),  $Mn^{2+} + Ca^{2+}$ -free (red trace),  $Mn^{2+} + Ca^{2+}$ -  
908 free + nifedipine (green trace), and washout (blue trace). **C**, Mn increased firing rate even in the  
909 combination of  $Mn^{2+}$  and  $Ca^{2+}$ -free. Additional application of nifedipine significantly reduced  
910 firing rate ( $F_{(2,18)} = 44.4$ ,  $p = 0.0006$ , one-way ANOVA followed by Tukey's test,  $n = 7$  / group).  
911 **D**, Application of  $Mn^{2+} + Ca^{2+}$ -free or further administrated nifedipine did not change the  
912 membrane potential. **E**, Half-width was measured at half-maximal voltage of action potential;  
913 there was no change in the half-width of,  $Mn^{2+} + Ca^{2+}$ -free and additional plus nifedipine  
914 experimental groups. **F**, Both  $Mn^{2+}$  plus  $Ca^{2+}$ -free and further added nifedipine condition  
915 significantly depressed the amplitude of action potential ( $F_{(2,18)} = 11.80$ ,  $p = 0.001$ , one-way  
916 ANOVA followed by Tukey's test,  $n = 7$  / group). **G**,  $Mn^{2+}$  plus  $Ca^{2+}$ -free and additional  
917 application of nifedipine increased the coefficients of variation of the interspike interval ( $F_{(2,18)} =$   
918  $14.11$ ,  $p = 0.0016$ , one-way ANOVA followed by Tukey's test,  $n = 7$  / group). \*\* $p < 0.01$ .

919

920 **Figure 8. Manganese reduced voltage-gated  $Ca^{2+}$  currents.** **A**, Representative traces of inward  
921 currents in response to voltage steps (5 mV, 250 ms) from -60 mV to +85 mV in a bath solution  
922 containing 0.5  $\mu$ M TTX, 35 mM TEA and 1mM CsCl. **A<sub>1</sub>**, Inward currents evoked by voltage steps  
923 during application of extracellular  $Ca^{2+}$ -free plus 2mM  $Mn^{2+}$  solution. **A<sub>2</sub>**, Inward currents evoked  
924 by voltage steps in the presence of 2 mM  $Ca^{2+}$ . **A<sub>3</sub>**, Inward currents evoked by voltage steps in the  
925 presence of 2 mM  $Ca^{2+}$  plus 100 mM  $Mn^{2+}$ . **B**, Plot shows the current-voltage relationship (I-V  
926 curves) induced by  $Mn^{2+}$ . **C**, Plot shows current-voltage relationships (I-V curves) of peak voltage-



927 gated  $\text{Ca}^{2+}$  current density in dopamine neurons at baseline (black squares) and following  $\text{Mn}^{2+}$   
928 exposure (blue squares), ( $*p < 0.05$ , two-tailed Student's  $t$  tests;  $n = 7 / \text{group}$ ).

929

930 **Figure 9. Manganese enhanced magnetic resonance imaging (MEMRI) provides evidence of**

931 **an *in vivo*  $\text{Ca}^{2+}$ -channel dependent mechanism involved in midbrain manganese**

932 **accumulation.**  $R_1$  ( $1/T_1$ ) maps. The top figure displays the location of the ventral tegmental area

933 (VTA) and substantia nigra (SN). The middle figure displays a custom template from all controls

934 and experimental groups (nifedipine administered rats). The bottom figure displays the average  $R_1$

935 map of both cohorts. Maps display values up to  $2 \text{ s}^{-1}$  with yellow representing large values ( $\sim 2 \text{ s}^{-1}$ )

936 and red representing low values ( $\sim 0$ ). The control group shows a small number of voxels of  $R_1$

937 larger within the threshold showing less  $\text{Mn}^{2+}$  infiltration in the midbrain. **A<sub>1</sub>**, Mouse brain atlas-

938 based segmentation of the VTA and SN. **A<sub>2</sub>**, Template brain for Mn alone or with nifedipine

939 treatment that were aligned with mouse brain atlas. **A<sub>3</sub>**, Parametric maps of  $T_1$  relaxation rate ( $R_1$

940 in  $\text{msec}^{-1}$ ) show that calcium channel blockade with nifedipine treatment reduces  $R_1$  in midbrain

941 and surrounding areas. Scale bar indicates intensity of  $R_1$ . **B**, Nifedipine reduces  $T_1$  relaxation rate

942 ( $R_1$ ) in VTA and SN (VTA:  $t_{(15)} = -2.2$ ,  $p = 0.04$ , two-tailed Student's  $t$  tests; Sn:  $t_{(15)} = -2.7$ ,  $p =$

943  $0.015$ , two-tailed Student's  $t$  tests;  $n = 8 - 9 / \text{group}$ ). **C**, A greater  $\text{Mn}^{2+}$  accumulation produces

944 faster rates of  $T_1$  relaxation ( $R_1$ ) in VTA and SN than in other cortical and subcortical nuclei ( $F_{(9,72)}$

945  $= 3.96$ ,  $p < 0.001$ , one-way ANOVA followed by Tukey's test,  $n = 8 - 9 / \text{group}$ ). **\*\*p < 0.01.**

946

947 **Figure 10.  $^{54}\text{Mn}$  uptake is greater in  $\text{Ca}_v1.2$  overexpressing HEK293 cells. **A**, Representative**

948 **western blot analysis is showing the expression of  $\text{Ca}_v1.2$  and  $\text{Ca}_v1.3$  in cells transiently-**

949 **transfected to overexpress  $\text{Ca}_v1.2$  and  $\text{Ca}_v1.3$ . **B**, Greater  $^{54}\text{Mn}$  uptake is shown in  $\text{Ca}_v1.2$**

950 overexpressing cells at the indicated time points. **C**, Nifedipine inhibits  $^{54}\text{Mn}$  uptake at 15 minutes  
951 in  $\text{Ca}_v1.2$  overexpressing cells. (One-way ANOVA followed by Tukey's test,  $n = 3 / \text{group}$ ).  
952 \* $p < 0.05$ )

953

954 **Figure 11. Superposition of  $\text{msCa}_v1.1$  Ca binding site structure with the  $\text{msCa}_v1.2$  model.**

955 The  $\text{Ca}^{2+}$  ion (green) as located in the  $\text{msCa}_v1.1$  structure (tan color backbone) (PDB ID 5GJW).

956 The homology model structure for  $\text{Ca}_v1.2$  alpha chain is shown in the blue color backbone.

957

958 **Figure 12- Blockade of BK channels inhibited Manganese-stimulation of the spontaneous**

959 **firing activity in dopamine neurons. A**, Top: representative spontaneous firing activities of a

960 dopamine neuron exposed to paxilline followed by Mn treatment. Firing rate returns to baseline

961 after washout with artificial cerebral spinal fluid (aCSF) solution. Bottom: Rate histogram of above

962 trace. **B**, Superimposed traces of representative single action potential shown in A: baseline (black

963 trace), paxilline (green trace), Mn (red trace) and washout (blue trace). **C**, Paxilline reduced the

964 spontaneous firing rate; Mn treatment did not attenuate the paxilline-induced reduction of firing

965 activity. **D**, Paxilline and concomitant Mn + paxilline applications significantly depolarized the

966 membrane potential. **E**, Half-width is measured at half-maximal voltage of action potential. The

967 half-width was broadened after paxilline application, but returned to baseline after co-

968 administration of Mn and paxillin. **F**, Paxilline increased the amplitude of action potential, but

969 diminished the effect of Mn on the action potential amplitude. **G**, Blockade of BK channels

970 exhibited larger coefficients of variation of the interspike interval. \* $p < 0.05$ ; \*\* $p < 0.01$ ,  $n = 8$  per

971 group.

972

973 **Figure 13- Membrane localization of BK GFP- $\alpha$  subunit is increased followed manganese**  
974 **exposure.** *A*, Representative TIRF microscopy images of GFP- $\alpha$  subunit following vehicle or 100  
975  $\mu\text{M Mn}^{2+}$  treatments. *B*, Analyses of relative fluorescence intensities at the surface membrane  
976 following vehicle or 100  $\mu\text{M Mn}^{2+}$ . Scale bar: 20  $\mu\text{m}$ . †:  $p < 0.01$ .

977

978 **Figure 14- Manganese increases BK currents.** *A*, Representative traces of outward currents in  
979 response to voltage steps (5 mV, 250 ms) from -60 mV to +85 mV in a bath solution containing  
980 0.5  $\mu\text{M TTX}$ , 35 mM TEA and 1mM CsCl. *A*, In cells expressing BK- $\alpha$  subunits, families of  
981 outward currents were evoked by voltage steps from -60 to +85 mV for 250 ms with 5 mV  
982 increments every 5 s from the holding potential of -70 mV, before (A) and after (B) Mn  
983 administration. *C*, shows peak current-voltage relationships (I-V curves) before (baseline) and  
984 after Mn application. \* $p < 0.05$ .

985

986 **Supplemental Figure. 1.  $\text{Mn}^{2+}$  induces release of FFN200 from dorsal striatum.** *A*. Time lapse  
987 images of a striatal slice loaded with FFN200 following nomifensine (A top panel) or 100  $\mu\text{M}$   
988  $\text{Mn}^{2+}$  treatments (A bottom panel).  $\text{Mn}^{2+}$  treatment decreased FFN200 puncta intensities (yellow  
989 arrows). *B*. *C*. Quantification of FFN200 puncta fluorescence normalized to the averaged intensity  
990 of first 60sec for each experimental condition. Scale bar: 10  $\mu\text{m}$ . †:  $p < 0.01$ .

991

992 **Supplemental Figure 2- Mn does not increase intracellular calcium.** Ratiometric analyses were  
993 performed on Fura-2-loaded dopamine neurons. *A*, Representative pseudo color images indicating  
994 the 340/380 ratio via a visible spectrum heat map (violet – minimum  $\text{Ca}^{2+}$ ; red – maximum  $\text{Ca}^{2+}$ ).  
995 Left panel shows representative 340/380 ratio images before and after drug or vehicle application,

996 right panel shows identical view-fields 30-seconds after vehicle (top), 100  $\mu$ M Mn (middle) and  
997 20mM caffeine (bottom). **B**, Mean fluorescence intensities for each condition (normalized to the  
998 initial 30 s intensity). Data are plotted in 1.5 s interval for vehicle (black squares), Mn<sup>2+</sup> (red  
999 squares), caffeine (blue squares). Scale bar: 20  $\mu$ m. †:  $p < 0.01$ .

1000

1001

1002 **Supplemental Figure 3- Ca<sup>2+</sup> channel blockade using nifedipine reduces the effects of Mn<sup>2+</sup>**  
1003 **on T<sub>1</sub> relaxation in several brain regions.** **A<sub>1</sub>**, Mouse brain atlas-based segmentation of the  
1004 primary (S1), secondary (S2) somatosensory cortex, globus pallidus, CA1, CA3, substantia nigra  
1005 compacta (SNc), primary motor cortex (M1), secondary motor cortex (M2), and striatum. ROI,  
1006 region of interest. **A<sub>2</sub>**, Effects of Mn<sup>2+</sup> accumulation on increasing brain T<sub>1</sub> relaxation rate (R<sub>1</sub> in  
1007 msec<sup>-1</sup>). **A<sub>3</sub>**, nifedipine treatment reduces the effects of Mn<sup>2+</sup> accumulation by reducing its  
1008 concentration in brain. Thus, maps of mice treated with nifedipine had a slower rate of T<sub>1</sub>  
1009 relaxation, or lower R<sub>1</sub> in the case of the shown parametric maps (and lower intensity). Scale bar  
1010 indicates intensity of R<sub>1</sub>. **B**, A greater Mn<sup>2+</sup> accumulation produces faster rates of T<sub>1</sub> relaxation  
1011 (R<sub>1</sub>) in VTA and SN than in other segmented cortical and subcortical nuclei ( $F_{(9,72)} = 3.96$ ,  $p <$   
1012  $0.001$ , one-way ANOVA followed by Tukey's test,  $n = 8 - 9$  / group). \*\* $p < 0.01$ .

1013

1014 Supplemental movie 1: Representative live cell imaging of FFN200 release before and after MnCl<sub>2</sub>.

1015 Supplemental movie 2: Representative live cell imaging of Ca<sup>2+</sup> mobilization before and after  
1016 MnCl<sub>2</sub>.

1017 Supplemental movie 3: Representative live cell imaging of Ca<sup>2+</sup> mobilization before and after  
1018 NMDA (positive control groups).

1019

1020 Supplemental movie 4: Representative live cell TIRF imaging before and after  $\text{MnCl}_2$ .

1021

1022

1023

1024 **References**

- 1025 Altschul SF, G. W., Miller, W., Myers, E. W. & Lipman, D. J. Basic local alignment search tool.  
1026 *J. Mol. Biol.* **215**, 403-410 (1990).
- 1027 Aoki, I., Naruse, S., & Tanaka, C. Manganese-enhanced magnetic resonance imaging (MEMRI)  
1028 of brain activity and applications to early detection of brain ischemia. *NMR Biomed.* **17**, 569-580  
1029 (2004).
- 1030 Aschner, J. L. & Aschner, M. Nutritional aspects of manganese homeostasis. *Mol Aspects Med.*  
1031 **26**, 353-362 (2005).
- 1032 Aschner, M., Guilarte, T.R., Schneider, J. S. & Zheng, W. Manganese: recent advances in  
1033 understanding its transport and neurotoxicity. *Toxicol Appl Pharmacol* **221**, 131-47 (2007).
- 1034 Aschner, M., Erikson, K. M., Herrero Hernández, E. & Tjalkens, R. Manganese and its role in  
1035 Parkinson's disease: from transport to neuropathology. *Neuromolecular Med* **11**, 252-266 (2009).
- 1036 Au, C., Benedetto, A. & Aschner, M. Manganese transport in eukaryotes: the role of DMT1.  
1037 *Neurotoxicology* **29**, 569-576 (2008).
- 1038 Bean, B. P. The action potential in mammalian central neurons. *Nat Rev Neurosci.* **8**, 451-465  
1039 (2007).
- 1040 Benedetti, B., Matyash, V. & Kettenmann, H. Astrocytes control GABAergic inhibition of neurons  
1041 in the mouse barrel cortex. *J Physiol* **589**(Pt 5), 1159-1172 (2011).
- 1042 Bowman, A. B. & Aschner, M. Considerations on manganese (manganese) treatments for in vitro  
1043 studies. *Neurotoxicology* **41**, 141-142 (2014).
- 1044 Bourinet, E. et al. The alpha 1E calcium channel exhibits permeation properties similar to low-  
1045 voltage-activated calcium channels. *J Neurosci* **16**, 4983-4993 (1996).
- 1046 Brenner, R. et al. Vasoregulation by the beta1 subunit of the calcium-activated potassium channel.  
1047 *Nature* **407**, 870-876 (2000).
- 1048 Cain, C. K., Blouin, A. M. & Barad, M. L-type voltage-gated calcium channels are required for  
1049 extinction, but not for acquisition or expression, of conditional fear in mice. *J Neurosci* **22**, 9113-  
1050 9121 (2002).
- 1051 Chae, K. S. & Dryer, S. E. The p38 mitogen-activated protein kinase pathway negatively regulates  
1052 Ca<sup>2+</sup>-activated K<sup>+</sup> channel trafficking in developing parasympathetic neurons. *J Neurochem* **94**,  
1053 367-379 (2005).
- 1054 Chen, C., Xu, Y., Zhang, J., Zhu, J., Zhang, J., Hu, N. & Guan, H. Altered expression of  
1055 nNOS/NIDD in the retina of a glaucoma model of DBA/2J mice and the intervention by nNOS  
1056 inhibition. *J Mol Neurosci* **51**, 47-56 (2013).

- 1057 Choi, D. W. Ionic dependence of glutamate neurotoxicity. *J Neurosci* **7**, 369-379 (1987).
- 1058 Choi, Y. M., Kim, S. H., Chung, S., Uhm, D. Y. & Park, M. K. Regional interaction of endoplasmic  
1059 reticulum Ca<sup>2+</sup> signals between soma and dendrites through rapid luminal Ca<sup>2+</sup> diffusion. *J*  
1060 *Neurosci* **26**, 12127-12136 (2006).
- 1061 Clapham, D. E. Calcium signaling. *Cell* **131**, 1047-1058 (2007).
- 1062 Crossgrove, J. & Zheng, W. Manganese toxicity upon overexposure. *NMR Biomed* **17**, 544–553  
1063 (2004).
- 1064 Crossgrove, J. S. & Yokel, R. A. Manganese distribution across the blood–brain barrier: IV.  
1065 Evidence for brain influx through store-operated calcium channels. *Neurotoxicology* **26**, 297–307  
1066 (2005).
- 1067 Dodd, C. A., Ward, D. L. & Klein, B. G. Basal Ganglia accumulation and motor assessment  
1068 following manganese chloride exposure in the C57BL/6 mouse. *Int J Toxicol* **24**, 389-397 (2005).
- 1069 Dodd, C. A., Bloomquist, J. R. & Klein, B. G. Consequences of manganese administration for  
1070 striatal dopamine and motor behavior in 1-methyl-4-phenyl-1,2,3,6-tetrahydropyridine-exposed  
1071 C57BL/6 mice. *Hum. Exp. Toxicol* **32**, 865–880 (2013).
- 1072 Cox, N., Toro, B., Pacheco-Otalora, L. F., Garrido-Sanabria, E. R. & Zarei, M. M. An endoplasmic  
1073 reticulum trafficking signal regulates surface expression of  $\beta$ 4 subunit of a voltage- and Ca<sup>2+</sup>-  
1074 activated K<sup>+</sup> channel. *Brain Res* **1553**, 12–23 (2014).
- 1075 Erikson, K. M., Syversen, T., Aschner, J. L. & Aschner, M. Interactions between excessive  
1076 manganese exposures and dietary iron-deficiency in neurodegeneration. *Environ Toxicol*  
1077 *Pharmacol* **19**, 415–421 (2005).
- 1078 Fujishiro, H., Yoshida, M., Nakano, Y. & Himeno, S. Interleukin-6 enhances manganese  
1079 accumulation in SH-SY5Y cells: implications of the up-regulation of ZIP14 and the down-  
1080 regulation of ZnT10. *Metallomics*. **6**, 944-949 (2014).
- 1081 Gandhi, D., Sivanesan, S. & Kannan, K. Manganese-Induced Neurotoxicity and Alterations in  
1082 Gene Expression in Human Neuroblastoma SH-SY5Y Cells. *Biol Trace Elem Res* **183**, 245-253  
1083 (2018).
- 1084 Giordano, T. P. et al. Molecular switch from L-type Ca v 1.3 to Ca v 1.2 Ca<sup>2+</sup> channel signaling  
1085 underlies long-term psychostimulant-induced behavioral and molecular plasticity. *J Neurosci* **30**,  
1086 17051-62 (2010).
- 1087 Goodwin, J. S., Larson, G. A., Swant, J., Sen, N., Javitch, J. A., Zahniser, N. R., De Felice, L. J.  
1088 & Khoshbouei, H. Amphetamine and methamphetamine differentially affect dopamine  
1089 transporters in vitro and in vivo. *J Biol Chem* **284**, 2978–2989 (2009).

- 1090 Goytain, A., Hines, R. M. & Quamme, G. A. Huntingtin-interacting proteins, HIP14 and HIP14L,  
1091 mediate dual functions, palmitoyl acyltransferase and Mg<sup>2+</sup> transport. *J. Biol. Chem* **283**, 33365–  
1092 33374 (2008).
- 1093 Greene, A. C & Madgwick, J. C. Heterotrophic manganese-oxidizing bacteria from Groote  
1094 Eylandt, Australia. *Geomicrobiol J* **6**, 119–127 (1988).
- 1095 Guilarte, T. R. Manganese and Parkinson's disease: A critical review and new findings. *Environ.*  
1096 *Health Perspect* **118**, 1071–1080 (2010).
- 1097 Gunshin, H. et al. Cloning and characterization of a mammalian proton-coupled metal-ion  
1098 transporter. *Nature* **388**, 482–488 (1997).
- 1099 Gunter, T. E., Gerstner, B., Gunter, K. K., Malecki, J., Gelein, R., Valentine, W. M., Aschner, M.  
1100 & Yule, D. I. Manganese transport via the transferrin mechanism. *Neurotoxicology* **34**, 118–127  
1101 (2013).
- 1102 Guzman, J. N., Sánchez-Padilla, J., Chan, C. S. & Surmeier, D. J. Robust pacemaking in substantia  
1103 nigra dopaminergic neurons. *J Neurosci* **29**, 11011–11019 (2009).
- 1104 Higashi, Y., Asanuma, M., Miyazaki, I., Hattori, N., Mizuno, Y. & Ogawa, N. Parkin attenuates  
1105 manganese-induced dopaminergic cell death. *J Neurochem* **89**, 1490-1497 (2004).
- 1106 Itoh, K., Sakata, M., Watanabe, M., Aikawa, Y. & Fujii, H. The entry of manganese ions into the  
1107 brain is accelerated by the activation of N-methyl-D-aspartate receptors. *Neuroscience* **154**, 732–  
1108 740 (2008).
- 1109 Jankovic, J. Searching for a relationship between manganese and welding and Parkinson's disease.  
1110 *Neurology* **64**, 2021-2018 (2005).
- 1111 Jenkinson, M., Bannister, P., Brady, M. & Smith, S. Improved optimization for the robust and  
1112 accurate linear registration and motion correction of brain images. *Neuroimage*. **17**, 825-841  
1113 (2002).
- 1114 Jinnah, H. A., Yitta, S., Drew, T., Kim, B. S., Visser, J. E. & Rothstein JD Calcium channel  
1115 activation and self-biting in mice. *Proc Natl Acad Sci U S A* **96**, 15228-15232 (1999).
- 1116 Josephs, K. A., Ahlskog, J. E., Klos, K. J., Kumar, N., Fealey, R. D., Trenerry, M. R. & Cowl, C.  
1117 T. Neurologic manifestations in welders with pallidal MRI T1 hyperintensity. *Neurology* **64**, 2033–  
1118 2039 (2005).
- 1119 Kessler, K. R., Wunderlich, G., Hefter, H. & Seitz, R. J. Secondary progressive chronic  
1120 manganism associated with markedly decreased striatal D2 receptor density. *Mov Disord* **18**, 217–  
1121 218 (2003).
- 1122 Kitazawa, M., Anantharam, V., Yang, Y., Hirata, Y., Kanthasamy, A. & Kanthasamy, A. G.  
1123 Activation of protein kinase C delta by proteolytic cleavage contributes to manganese-induced  
1124 apoptosis in dopaminergic cells: protective role of Bcl-2. *Biochem. Pharmacol* **69**, 133–146 (2005).



- 1125 Knaus, H. G., Garcia-Calvo, M., Kaczorowski, G. J. & Garcia, M. L. Subunit composition of the  
1126 high conductance calcium-activated potassium channel from smooth muscle, a representative of  
1127 the mSlo and slowpoke family of potassium channels. *J Biol Chem* **269**, 3921–3924 (1994).
- 1128 Lauterbur, P. C. Progress in n.m.r. zeugmatography imaging. *Philos Trans R Soc Lond B Biol Sci.*  
1129 **289**(1037), 483-487 (1980).
- 1130 Lee, J. H., Silva, A. C., Merkle, H & Koretsky, A. P. Manganese-enhanced magnetic resonance  
1131 imaging of mouse brain after systemic administration of MnCl<sub>2</sub>: dose-dependent and temporal  
1132 evolution of T1 contrast. *Magn Reson Med* **53**, 640-648 (2005).
- 1133 Leyva-Illades, D. et al. SLC30A10 is a cell surface-localized manganese efflux transporter, and  
1134 Parkinsonism-causing mutations block its intracellular trafficking and efflux activity. *J. Neurosci*  
1135 **34**, 14079–14095 (2014).
- 1136 Lin, M., Sambo, D. & Khoshbouei, H. Methamphetamine Regulation of Firing Activity of  
1137 Dopamine Neurons. *J Neurosci* **36**, 10376-10391 (2016).
- 1138 Liu, X., Sullivan, K. A., Madl, J. E., Legare, M. & Tjalkens, R. B. Manganese-induced  
1139 neurotoxicity: the role of astroglial-derived nitric oxide in striatal interneuron degeneration.  
1140 *Toxicol Sci* **91**, 521-31 (2006).
- 1141 Lockman, P. R., Roder, K. E. & Allen, D. D. Inhibition of the rat blood-brain barrier choline  
1142 transporter by manganese chloride. *J. Neurochem* **79**, 588–594 (2001).
- 1143 Lu, R., Alioua, A., Kumar, Y., Eghbali, M., Stefani, E & Toro, L. MaxiK channel partners:  
1144 physiological impact. *J Physiol* **570**, 65–72 (2006).
- 1145 Madison, J. L., Wegrzynowicz, M., Aschner, M. & Bowman, A. B. Disease-toxicant interactions  
1146 in manganese exposed huntington disease mice: Early changes in striatal neuron morphology and  
1147 dopamine metabolism. *PLoS One* **7**: e31024 (2012).
- 1148 Martinez-Finley, E. J., Gavin, C. E., Aschner, M. & Gunter, T. E. Manganese neurotoxicity and  
1149 the role of reactive oxygen species. *Free Radic Biol Med.* **62**, 65-75 (2013).
- 1150 Mercuri, N. B., Bonci, A., Calabresi, P., Stratta, F., Stefani, A. & Bernardi, G. Effects of  
1151 dihydropyridine calcium antagonists on rat midbrain dopaminergic neurones. *Br. J. Pharmacol*  
1152 **113**, 831–838 (1994).
- 1153 Michalke, B. & Fernsebner, K. New insights into manganese toxicity and speciation. *J Trace Elem*  
1154 *Med Biol* **28**, 106-116 (2014).
- 1155 Morellini F. et al. Impaired Fear Extinction Due to a Deficit in Ca<sup>2+</sup> Influx Through L-Type  
1156 Voltage-Gated Ca<sup>2+</sup> Channels in Mice Deficient for Tenascin-C. *Front Integr Neurosci* doi:  
1157 10.3389/fnint (2017).
- 1158 Morikawa, H. & Paladini, C. A. Dynamic regulation of midbrain dopamine neuron activity:  
1159 intrinsic, synaptic, and plasticity mechanisms. *Neuroscience.* **198**, 95-111 (2011).

- 1160 Nedergaard, S., Flatman, J. A. & Engberg, I. Nifedipine- and omega-conotoxin-sensitive  $\text{Ca}^{2+}$   
1161 conductances in guinea-pig substantia nigra pars compacta neurones. *J. Physiol* **466**, 727–747  
1162 (1993).
- 1163 Olanow, C. W. Manganese-induced parkinsonism and Parkinson's disease. *Ann NY Acad Sci.* **1012**,  
1164 209-223 (2004).
- 1165 Perl, D. P. & Olanow, C. W. The neuropathology of manganese-induced parkinsonism. *J.*  
1166 *Neuropathol. Exp. Neurol* **66**, 675–682 (2007).
- 1167 Pereira, D.B. et al. Fluorescent false neurotransmitter reveals functionally silent dopamine vesicle  
1168 clusters in the striatum. *Nat Neurosci.* 19:578-586 (2016).
- 1169 Persson, I. Hydrated metal ions in aqueous solution: How regular are their structures? *Pure Appl.*  
1170 *Chem* **82**, 901–1917 (2010).
- 1171 Poole, D. S., Doorenweerd, N., Plomp, J. J., Mahfouz, A., Reinders, M. J. T. & van der Weerd, L.  
1172 Continuous infusion of manganese improves contrast and reduces side effects in manganese-  
1173 enhanced magnetic resonance imaging studies. *Neuroimage* **147**, 1-9 (2017).
- 1174 Puopolo, M., Raviola, E. & Bean, B. P. Roles of subthreshold calcium current and sodium current  
1175 in spontaneous firing of mouse midbrain dopamine neurons. *J Neurosci* **27**, 645-656 (2007).
- 1176 Puskin, J. S. & Gunter, T. E. Ion and pH gradients across the transport membrane of mitochondria  
1177 following  $\text{Mn}^{++}$  uptake in the presence of acetate. *Biochem Biophys Res Commun* **51**, 797-803  
1178 (1973).
- 1179 Putzier, I., Kullmann, P. H., Horn, J. P. & Levitan, E. S. Cav1.3 channel voltage dependence, not  
1180  $\text{Ca}^{2+}$  selectivity, drives pacemaker activity and amplifies bursts in nigral DA neurons. *J Neurosci*  
1181 **29**, 15414–15419 (2009).
- 1182 Rogers, K., Beaubrun, I., Catapane, E. & Carroll, M. The toxic effects of manganese on dopamine  
1183 D2 receptor activation is not due to inactivation of the phospholipase c receptor signal transduction  
1184 component (1143.7). *FASEB J* **28**:1143.7 (2014).
- 1185 Roth, J. A., Li, Z., Sridhar, S. & Khoshbouei, H. The effect of manganese on dopamine toxicity  
1186 and dopamine transporter (DAT) in control and DAT transfected HEK cells. *Neurotoxicology* **35**,  
1187 121–128 (2013).
- 1188 Saha, K., Sambo, D., Richardson, B. D., Lin, L. M., Butler, B., Villarroel, L. & Khoshbouei, H.  
1189 Intracellular methamphetamine prevents the dopamine-induced enhancement of neuronal firing. *J*  
1190 *Biol Chem* **289**, 22246-57 (2014).
- 1191 Sambo, D. O. et al. The sigma-1 receptor modulates methamphetamine dysregulation of dopamine  
1192 neurotransmission. *Nat Commun.* **20**;8(1):2228. doi: 10.1038/s41467-017-02087-x (2017).

- 1193 Schmidt, K. F. et al. Volume reconstruction techniques improve the correlation between  
1194 histological and in vivo tumor volume measurements in mouse models of human gliomas. *J*  
1195 *Neurooncol* **68**, 207-215 (2004).
- 1196 Seth, P. K. & Chandra, S. V. Neurotransmitters and neurotransmitter receptors in developing and  
1197 adult rats during manganese poisoning. *Neurotoxicology* **5**, 67–76 (1984).
- 1198 Shruti, S., Urban-Ciecko, J., Fitzpatrick, J. A., Brenner, R., Bruchez, M. P. & Barth, A. L. The  
1199 brain-specific beta4 subunit downregulates BK channel cell surface expression. *PLoS One* **7**,  
1200 e33429 (2012).
- 1201 Soriano, S. et al. Metal Homeostasis Regulators Suppress FRDA Phenotypes in a Drosophila  
1202 Model of the Disease. *PLoS One* **11**:e0159209 (2016).
- 1203 Streifel, K. M., Miller, J., Mouneimne, R. & Tjalkens, R. B. Manganese inhibits ATP-induced  
1204 calcium entry through the transient receptor potential channel TRPC3 in astrocytes.  
1205 *Neurotoxicology* **34**, 160-166 (2013).
- 1206 Tjalkens, R. B., Zoran, M. J., Mohl, B. & Barhoumi, R. Manganese suppresses ATP-dependent  
1207 intercellular calcium waves in astrocyte networks through alteration of mitochondrial and  
1208 endoplasmic reticulum calcium dynamics. *Brain Res* **1113**, 210-219 (2006).
- 1209 Torkkeli, P. H., Meisner, S., Pfeiffer, K. & French, A. S. GABA and glutamate receptors have  
1210 different effects on excitability and are differentially regulated by calcium in spider  
1211 mechanosensory neurons. *Eur J Neurosci* **36**, 3602-3614 (2012).
- 1212 Toro, B., Cox, N., Wilson, R. J., Garrido-Sanabria, E., Stefani, E., Toro, L & Zarei, M. M.  
1213 KCNMB1 regulates surface expression of a voltage and Ca<sup>2+</sup>-activated K<sup>+</sup> channel via endocytic  
1214 trafficking signals. *Neuroscience* **142**, 661–669 (2006).
- 1215 Tuschl, K., Mills, P. B. & Clayton, P. T. Manganese and the brain. *Int Rev Neurobiol* **110**, 277–  
1216 312 (2013).
- 1217 Uchino, A., Noguchi, T., Nomiya, K., Takase, Y., Nakazono, T., Nojiri, J. & Kudo, S.  
1218 Manganese accumulation in the brain: MR imaging. *Neuroradiology* **49**, 715–720 (2007).
- 1219 Verhoeven, W. M., Egger, J. I. & Kuijpers, H. J. Manganese and acute paranoid psychosis: a case  
1220 report. *J Med Case Rep* **5**:146. doi: 10.1186/1752-1947-5-146 (2011).
- 1221 Wang, B., Rothberg, B. S. & Brenner, R. Mechanism of increased BK channel activation from a  
1222 channel mutation that causes epilepsy. *J Gen Physiol* **133**, 283–294 (2009).
- 1223 Waterhouse, A. et al. SWISS-MODEL: homology modelling of protein structures and complexes.  
1224 *Nucleic Acids Res* **46**(W1), W296-W303 (2018).
- 1225 Weiger, T. M., Hermann, A. & Levitan, I. B. Modulation of calcium-activated potassium channels.  
1226 *J. Comp. Physiol. A Neuroethol. Sens. Neural. Behav. Physiol* **188**, 79–87 (2002).

- 1227 White, R. E., Schonbrunn, A. & Armstrong, D. L. Somatostatin stimulates Ca<sup>2+</sup>-activated K<sup>+</sup>  
1228 channels through protein dephosphorylation. *Nature* **351**:570–573 (1991).
- 1229 Wild, A. R., Jones, S. & Gibb, A. J. Activity-dependent regulation of NMDA receptors in  
1230 substantia nigra dopaminergic neurones. *J Physiol* **592**, 653-668 (2014).
- 1231 Wu, J. P., Yan, Z., Li, Z. Q., Qian, X. Y., Lu, S., Dong, M. Q., Zhou Q. & Yan, N. Structure of the  
1232 voltage-gated calcium channel Ca(v)1.1 at 3.6 Å resolution. *Nature* **537**, 191-196 (2016).
- 1233 Xu, B., Xu, ZF. & Deng, Y. Effect of manganese exposure on intracellular Ca<sup>2+</sup> homeostasis and  
1234 expression of NMDA receptor subunits in primary cultured neurons. *Neurotoxicology* **30**, 941-949  
1235 (2009).
- 1236 Zhang, D. Q., Stone, J. F., Zhou, T., Ohta, H. & McMahon, D. G. Characterization of genetically  
1237 labeled catecholamine neurons in the mouse retina. *Neuroreport* **15**, 1761–1765 (2004).
- 1238 Zogzas, C. E. & Mukhopadhyay, S. Inherited Disorders of Manganese Metabolism. *Adv*  
1239 *Neurobiol* **18**, 35-49 (2017).
- 1240

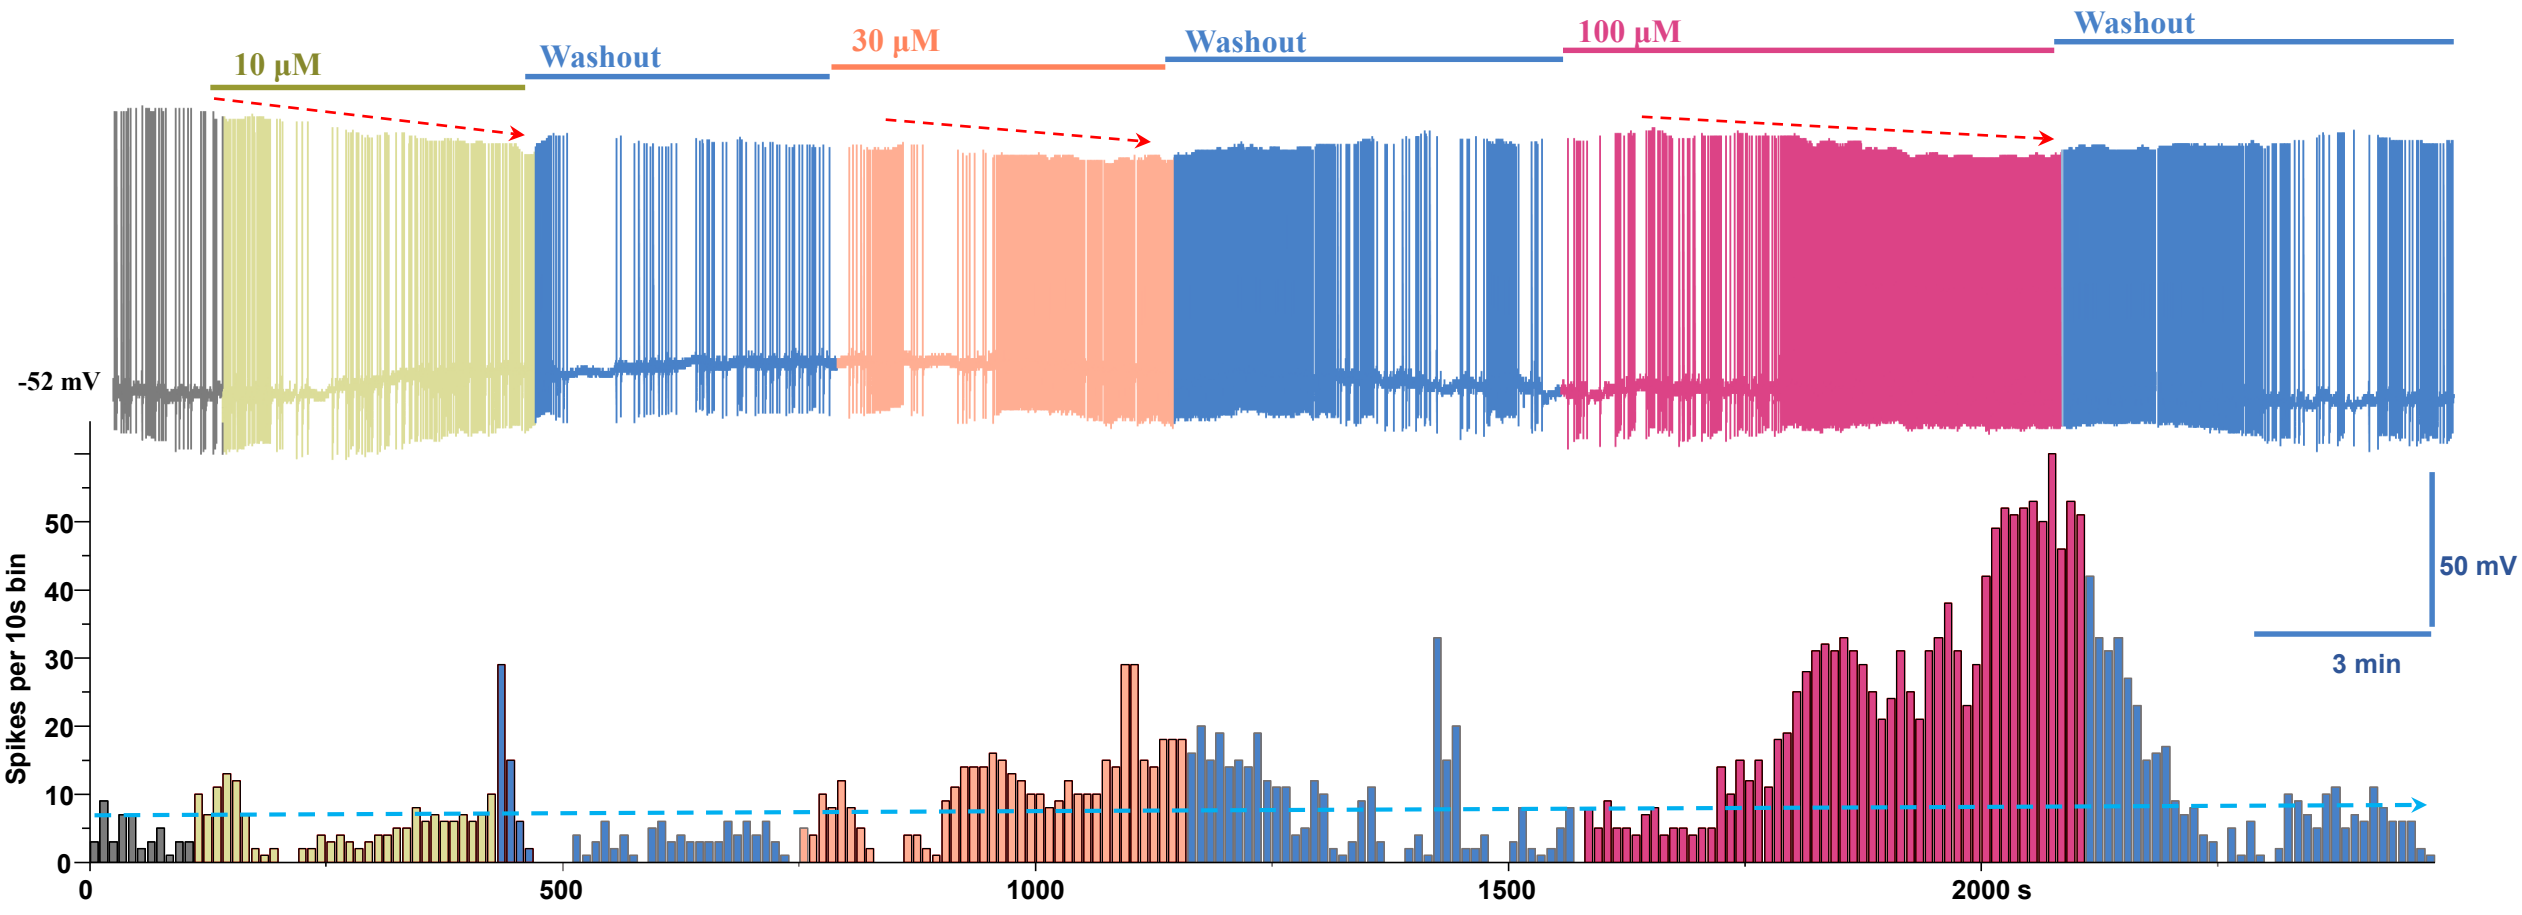

**A**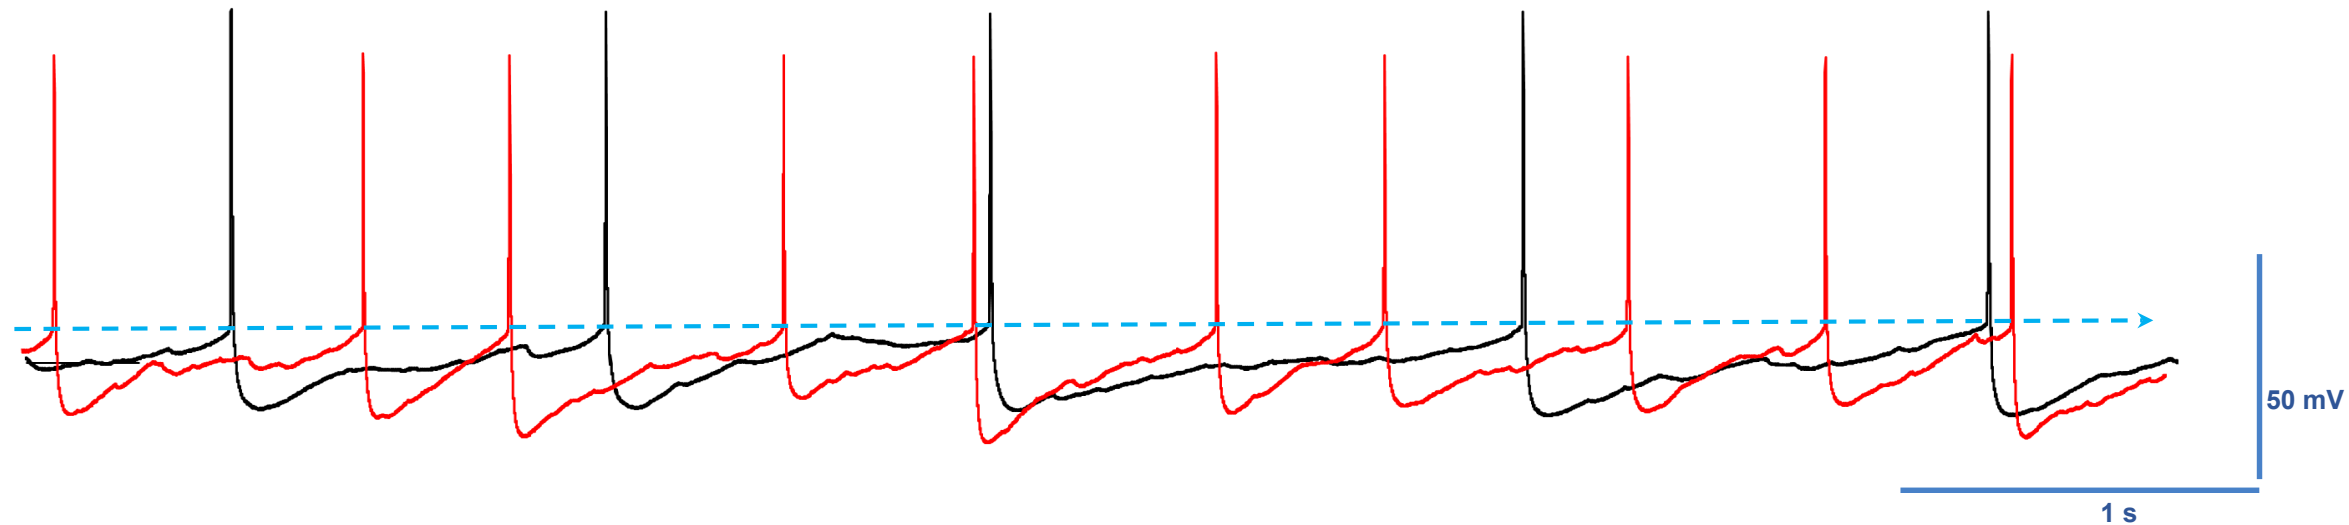**B**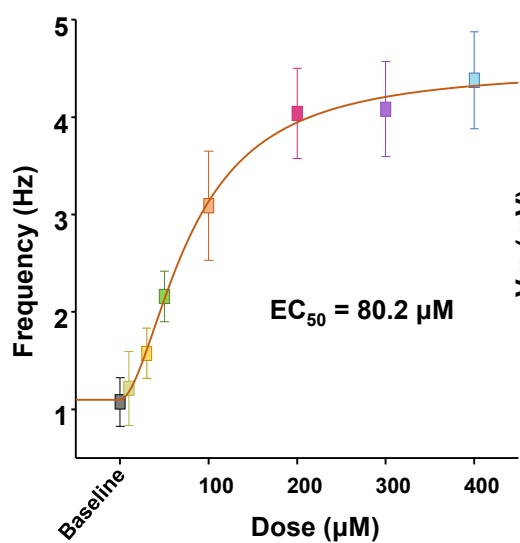

Baseline:  $1.08 \pm 0.2$  Hz (n = 10)  
 10:  $1.21 \pm 0.4$  Hz (n = 6, p = 0.73)  
 30:  $1.57 \pm 0.3$  Hz (n = 7, p = 0.14)  
 50:  $2.16 \pm 0.3$  Hz (n = 7, p = 0.3)  
 100:  $3.09 \pm 0.6$  Hz (n = 7, p = 0.0006)  
 200:  $4.04 \pm 0.5$  Hz (n = 13, p < 0.00001)  
 300:  $4.08 \pm 0.5$  Hz (n = 7, p < 0.00001)  
 400:  $4.38 \pm 0.5$  Hz (n = 6, p < 0.00001)

**C**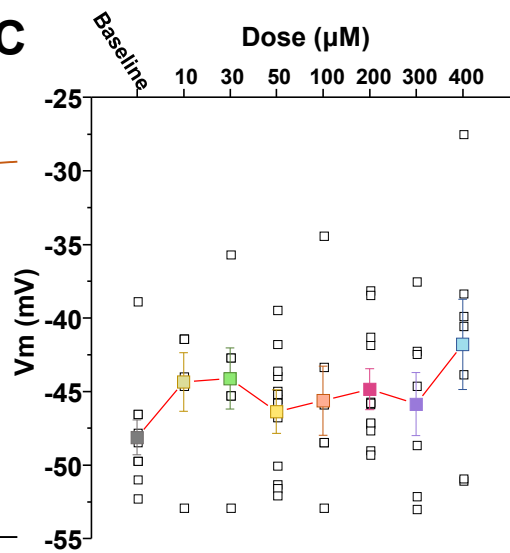

Baseline:  $-48.1 \pm 1.2$  mV (n = 10)  
 10:  $-44.3 \pm 2.0$  mV (n = 6, p = 0.09)  
 30:  $-44.1 \pm 2.1$  mV (n = 7, p = 0.08)  
 50:  $-46.3 \pm 1.5$  mV (n = 13, p = 0.29)  
 100:  $-45.6 \pm 2.4$  mV (n = 7, p = 0.29)  
 200:  $-44.8 \pm 1.4$  mV (n = 13, p = 0.048)  
 300:  $-45.8 \pm 2.1$  mV (n = 7, p = 0.33)  
 400:  $-41.8 \pm 3.1$  mV (n = 7, p = 0.045)

**D**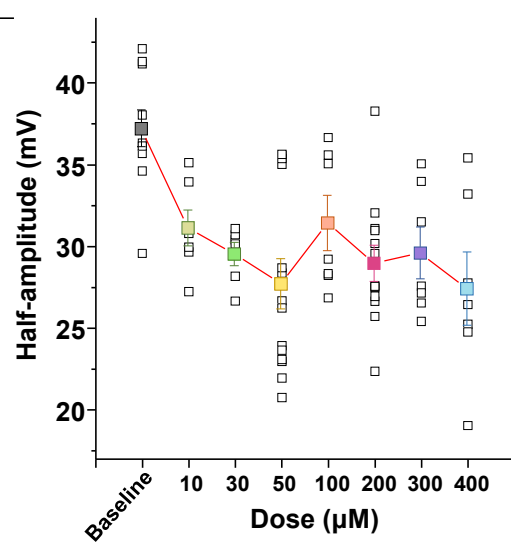

Baseline:  $37.2 \pm 1.1$  mV (n = 11)  
 10:  $31.1 \pm 1.1$  mV (n = 6, p = 0.003)  
 30:  $29.5 \pm 0.7$  mV (n = 6, p = 0.0002)  
 50:  $27.7 \pm 1.5$  mV (n = 14, p = 0.00005)  
 100:  $31.4 \pm 1.7$  mV (n = 7, p = 0.006)  
 200:  $29.0 \pm 1.1$  mV (n = 13, p = 0.00002)  
 300:  $29.6 \pm 1.6$  mV (n = 7, p = 0.0006)  
 400:  $27.4 \pm 2.2$  mV (n = 7, p = 0.0003)

**E**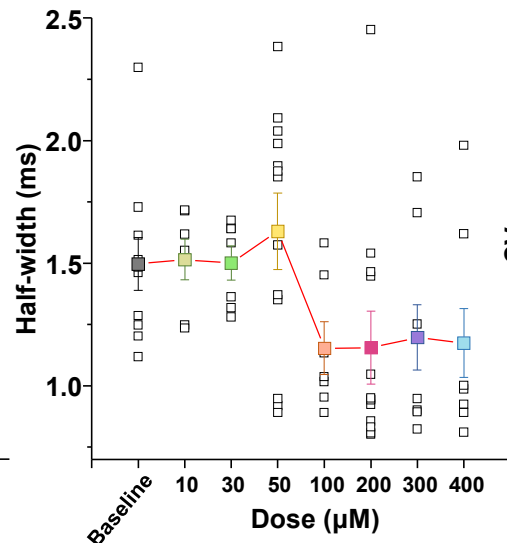

Baseline:  $1.5 \pm 0.1$  ms (n = 10)  
 10:  $1.5 \pm 0.02$  ms (n = 6, p = 0.91)  
 30:  $1.5 \pm 0.07$  ms (n = 7, p = 0.98)  
 50:  $1.6 \pm 0.15$  ms (n = 13, p = 0.47)  
 100:  $1.15 \pm 0.1$  ms (n = 7, p = 0.04)  
 200:  $1.15 \pm 0.1$  ms (n = 13, p = 0.02)  
 300:  $1.19 \pm 0.1$  ms (n = 7, p = 0.12)  
 400:  $1.17 \pm 0.1$  ms (n = 7, p = 0.11)

**F**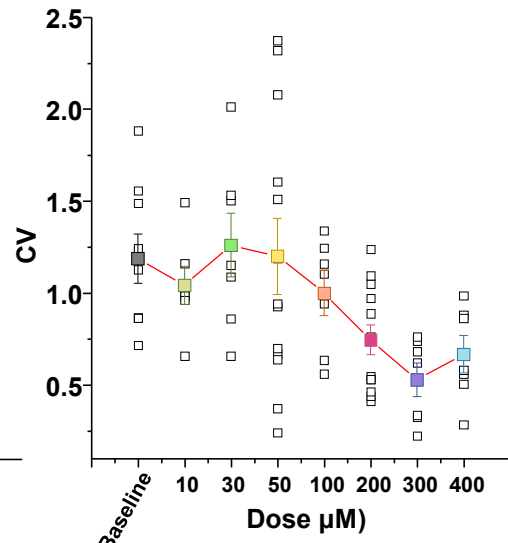

Baseline:  $1.18 \pm 0.1$  (n = 11)  
 10:  $1.04 \pm 0.1$  (n = 6, p = 0.40)  
 30:  $1.26 \pm 0.2$  (n = 7, p = 0.71)  
 50:  $1.20 \pm 0.2$  (n = 13, p = 0.96)  
 100:  $1.00 \pm 0.1$  (n = 7, p = 0.26)  
 200:  $0.74 \pm 0.08$  (n = 13, p = 0.0025)  
 300:  $0.53 \pm 0.09$  (n = 7, p = 0.0005)  
 400:  $0.66 \pm 0.1$  (n = 7, p = 0.004)

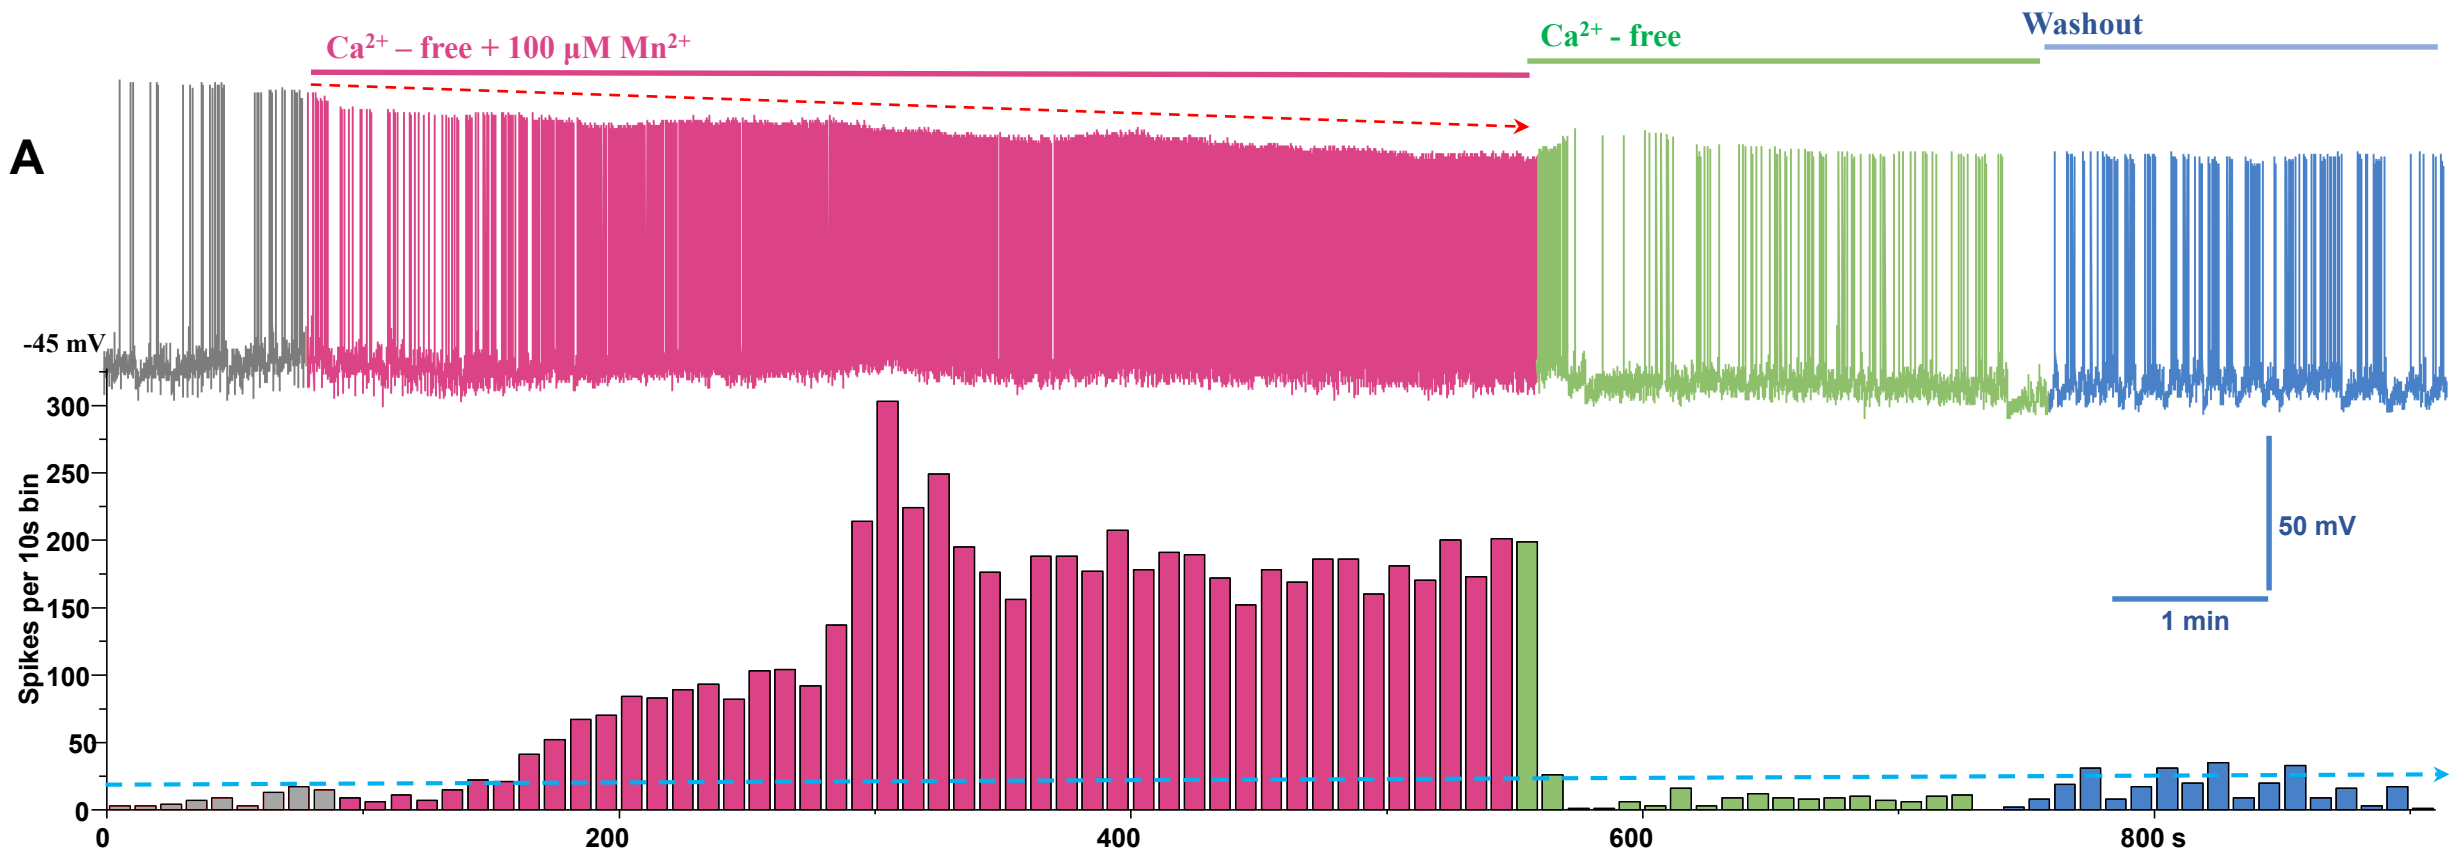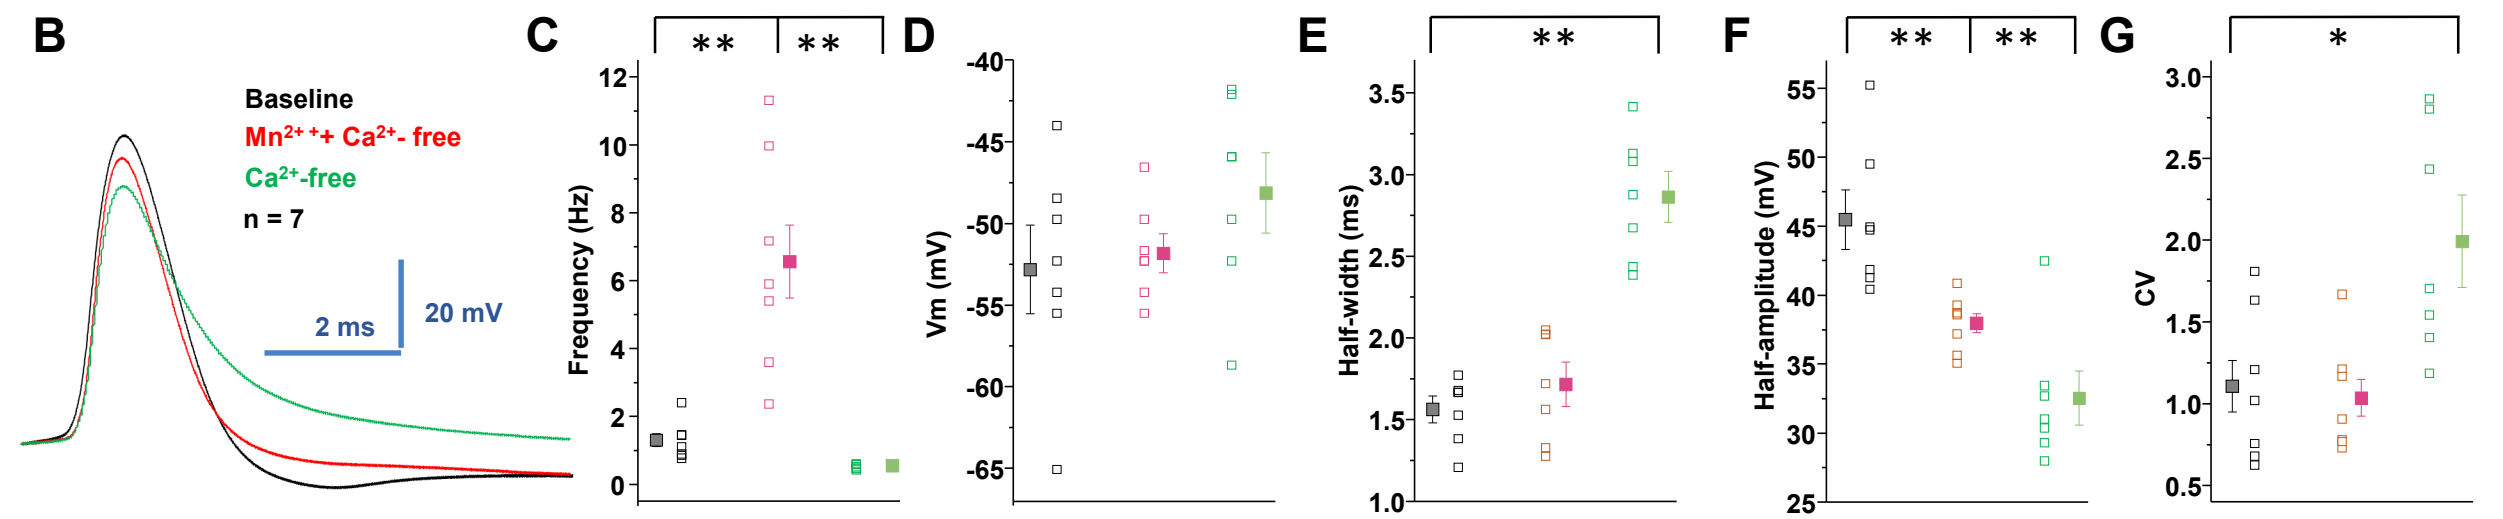

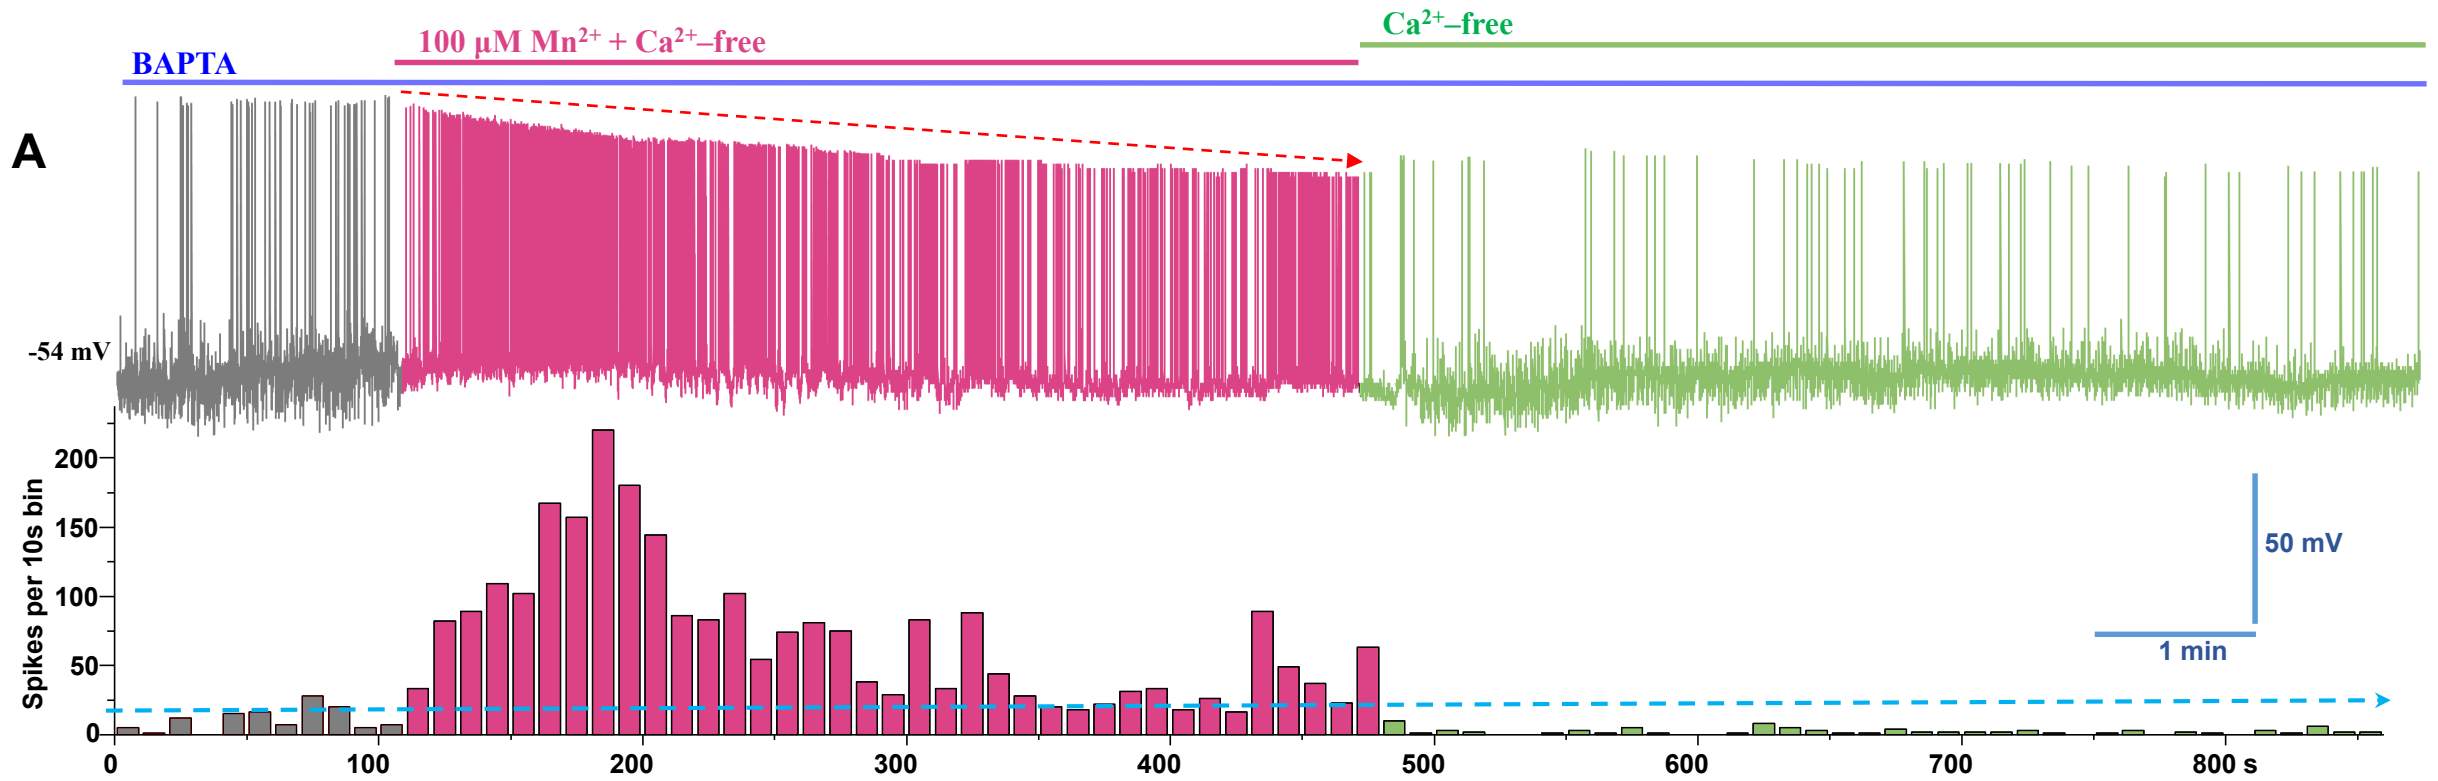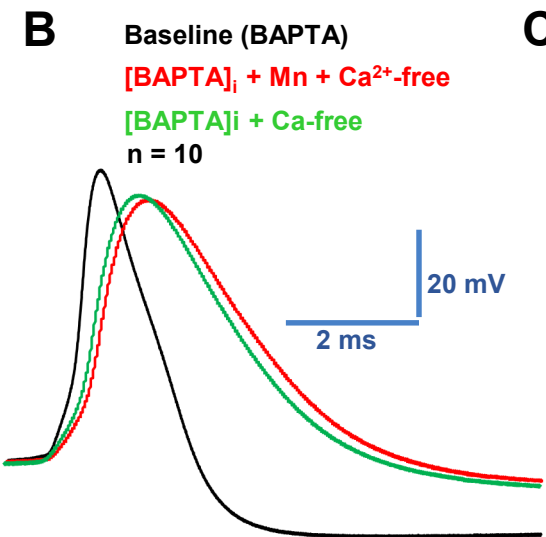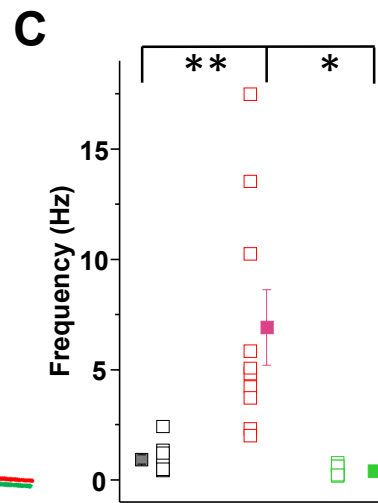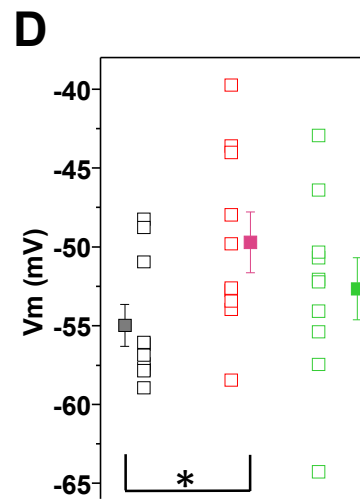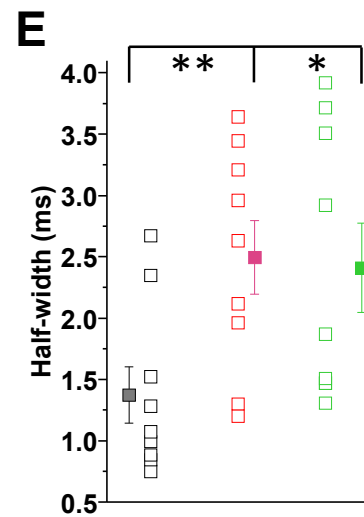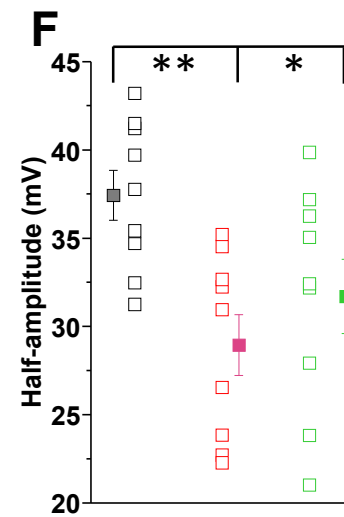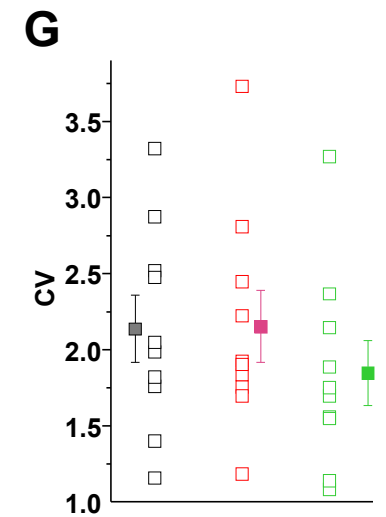



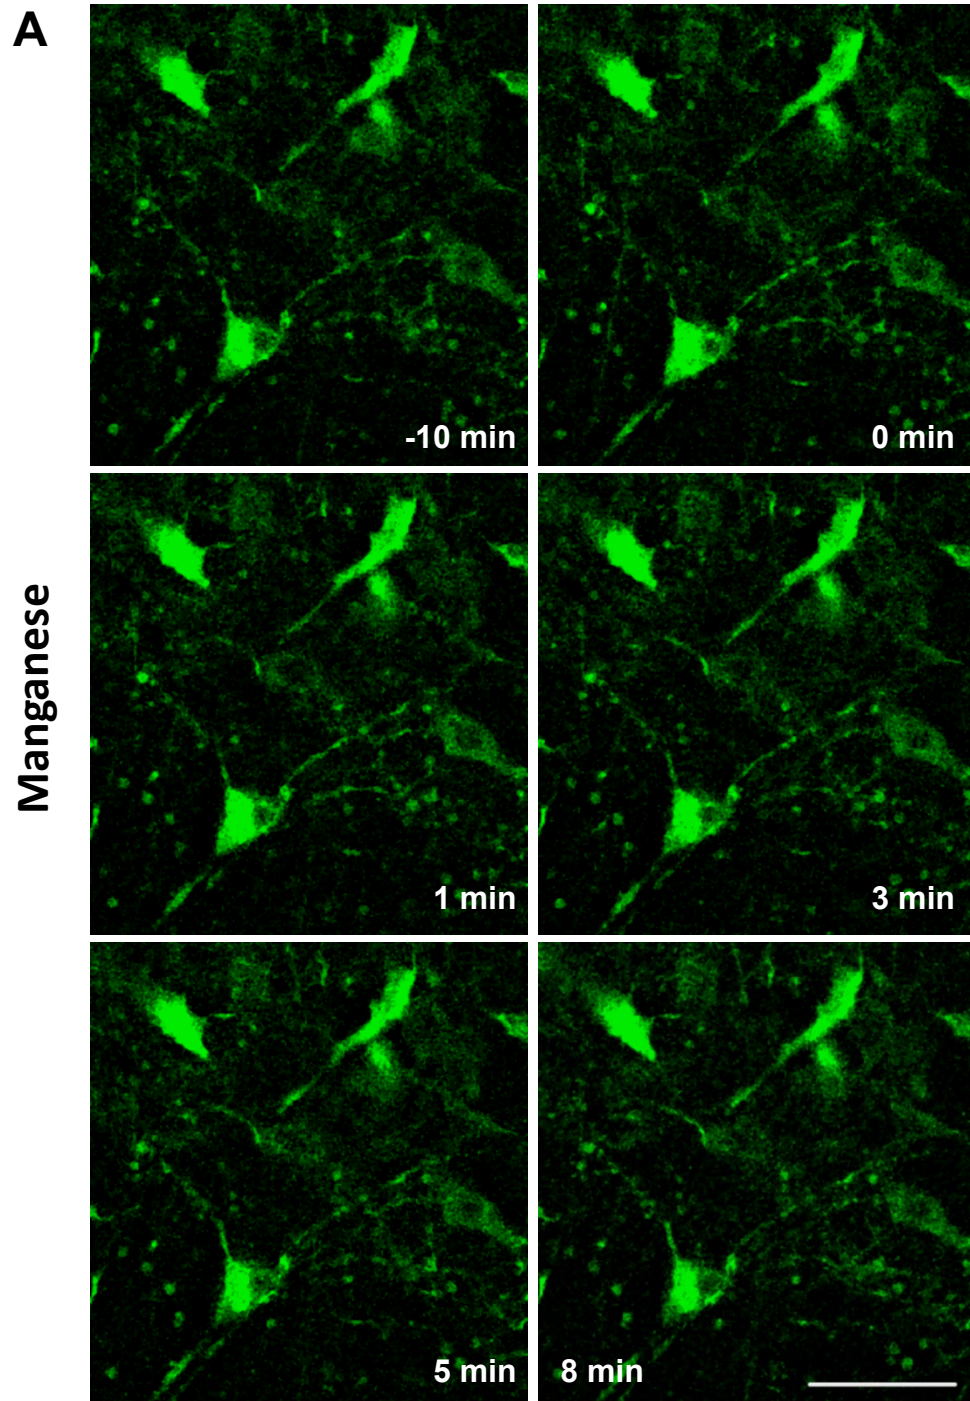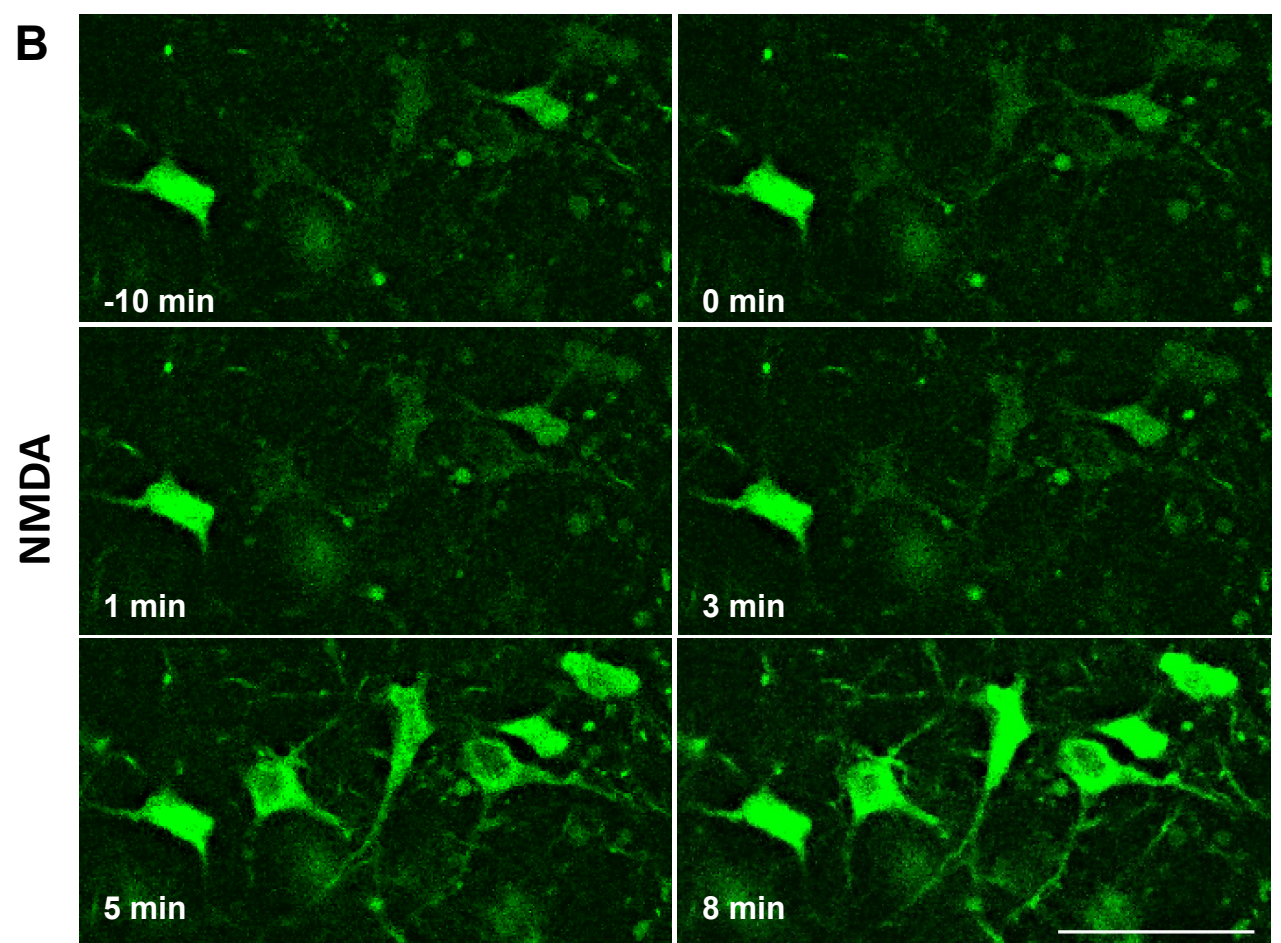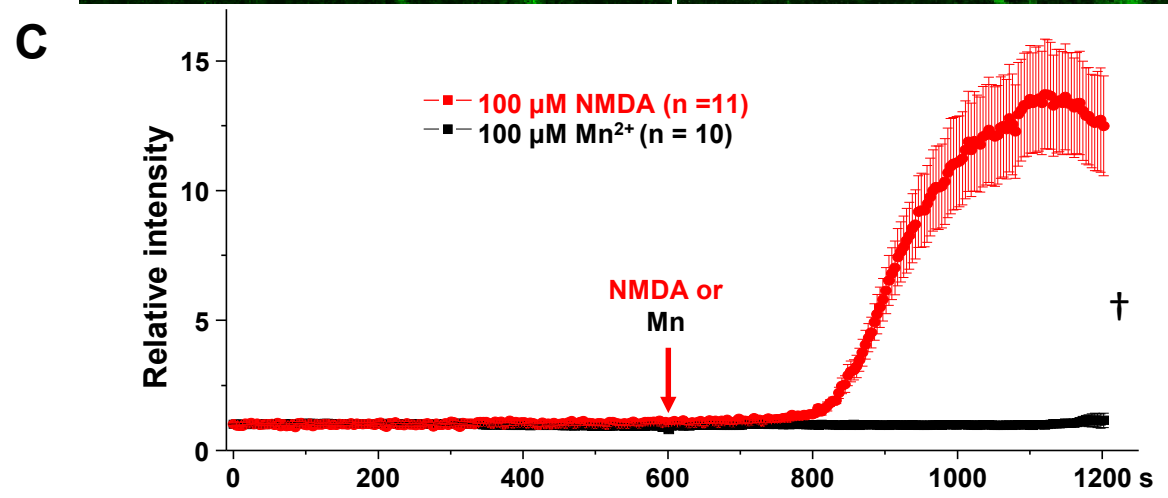

100  $\mu\text{M}$   $\text{Cd}^{2+}$

100  $\mu\text{M}$   $\text{Mn}^{2+}$

Washout

**A**

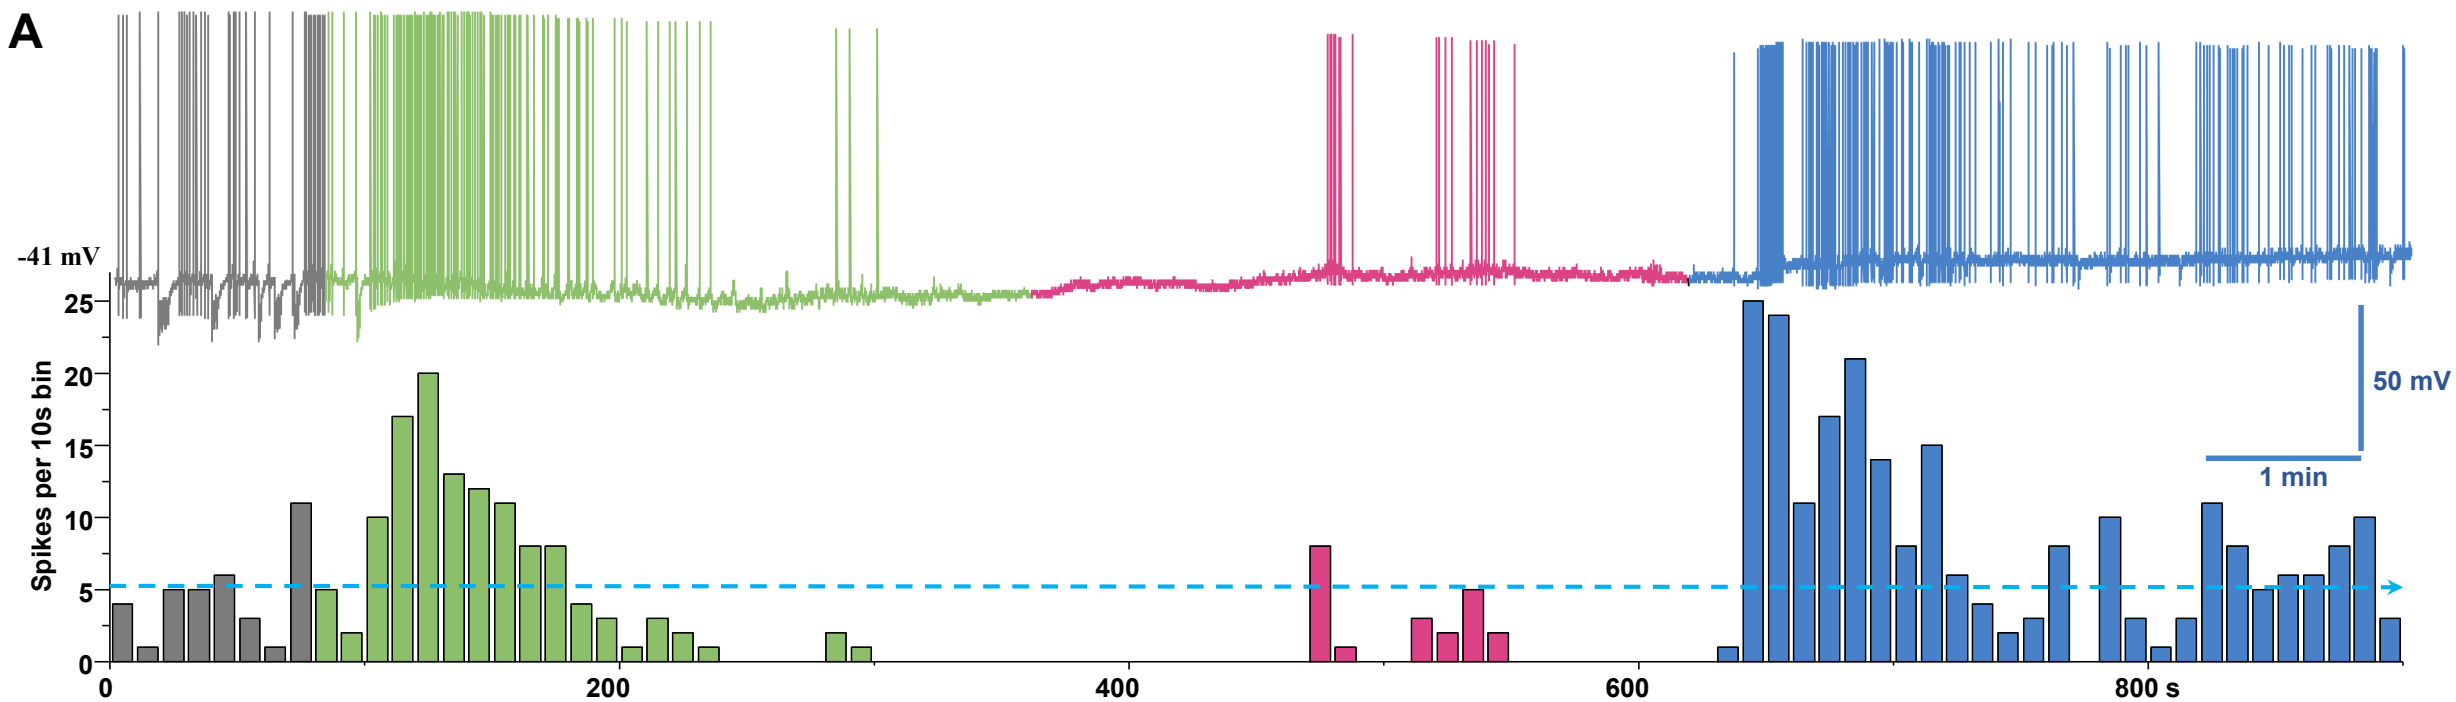

**B**

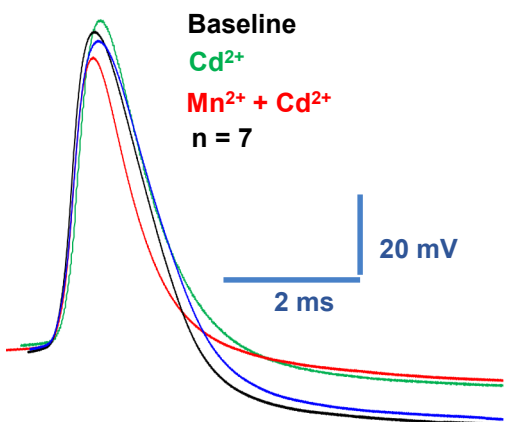

**C**

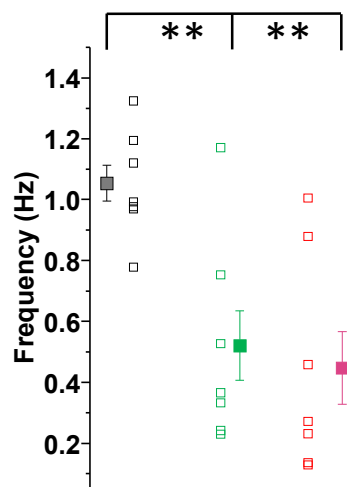

**D**

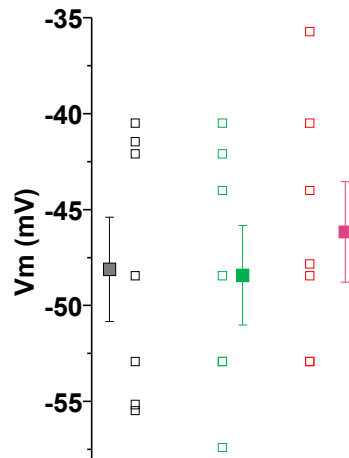

**E**

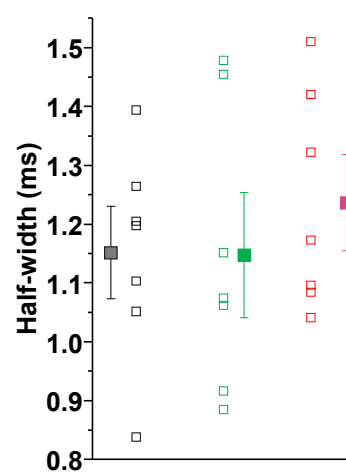

**F**

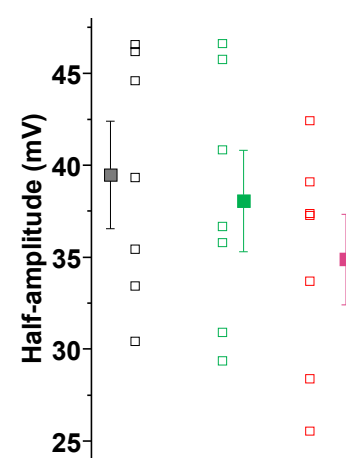

**G**

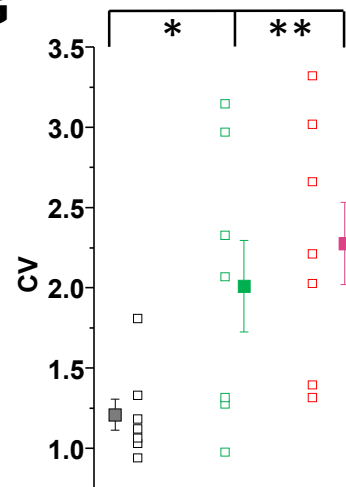

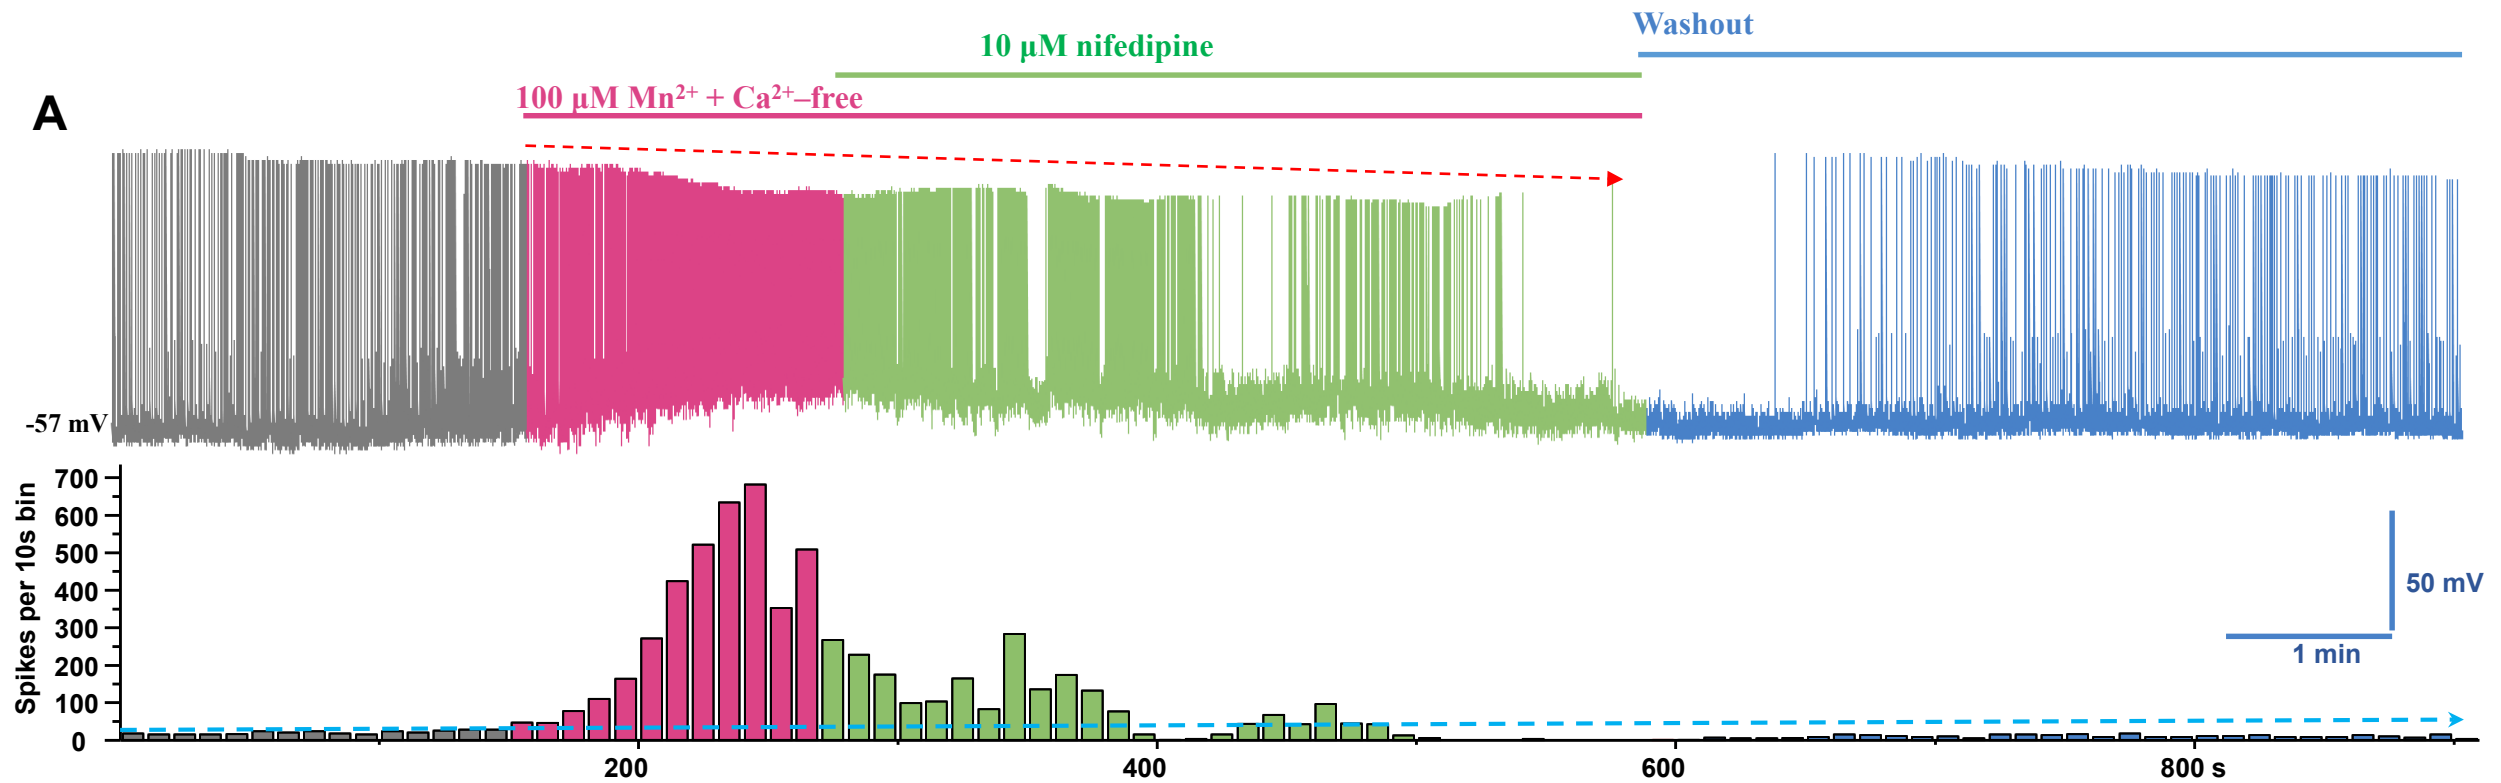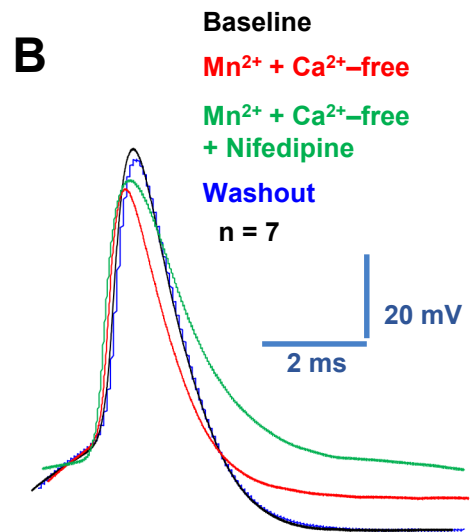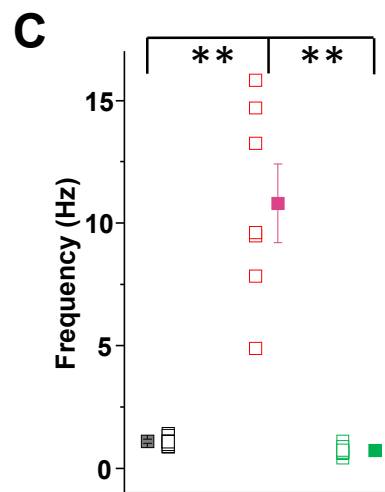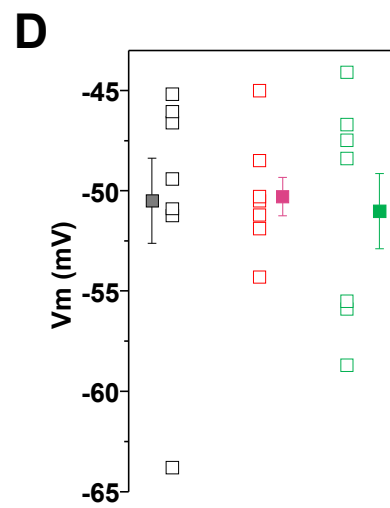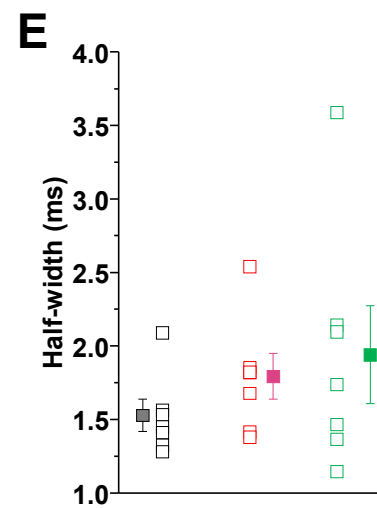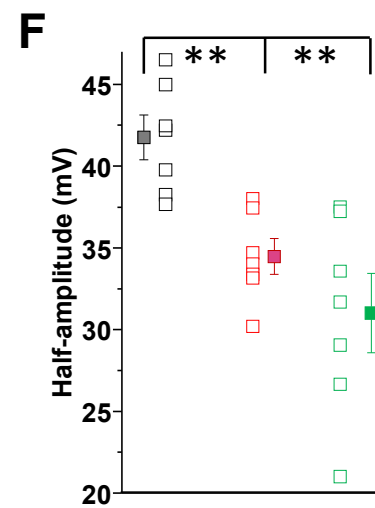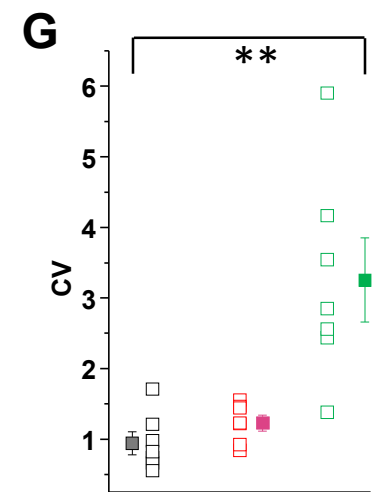

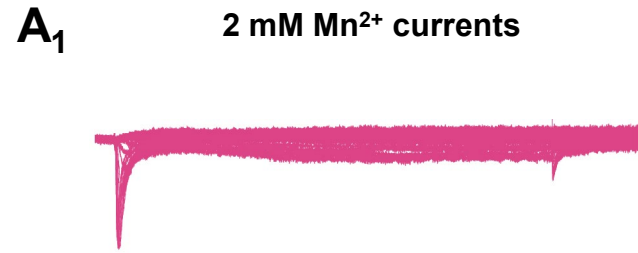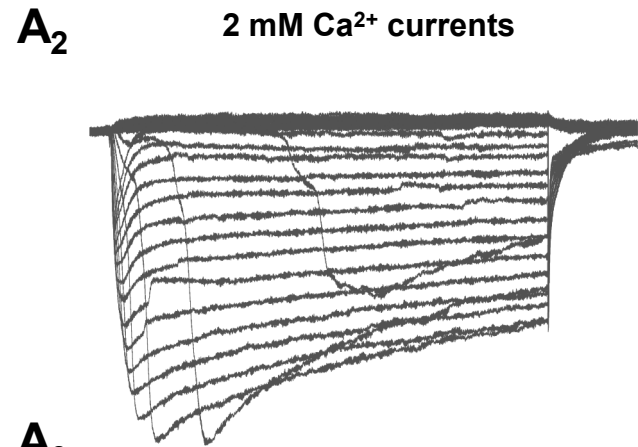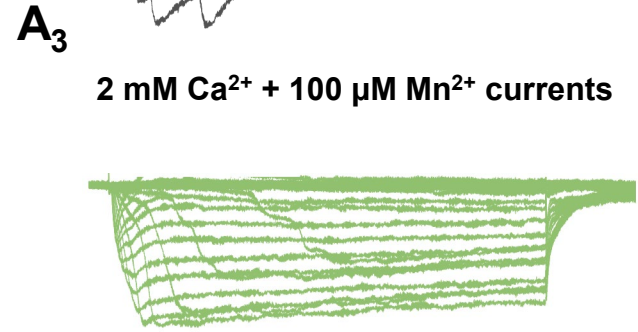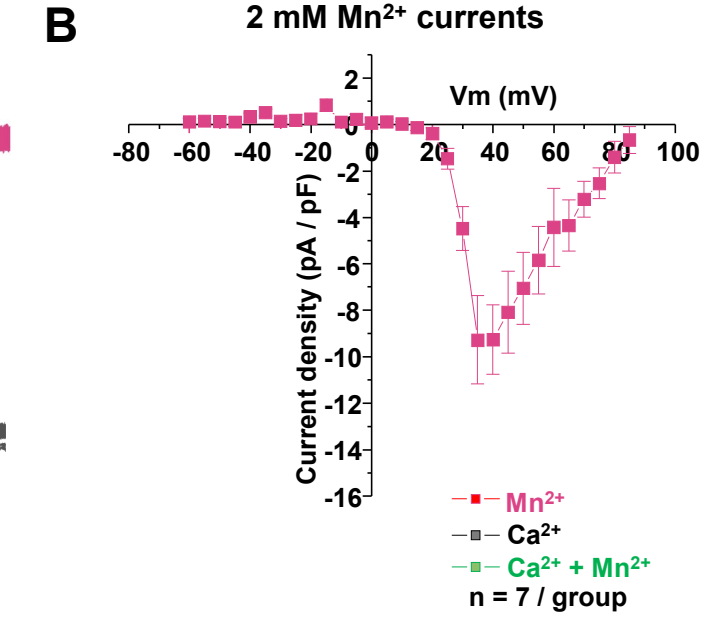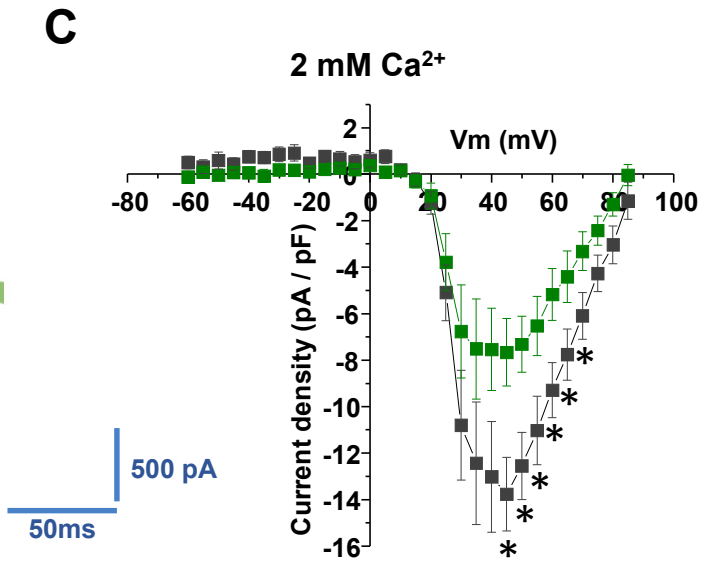

500 pA

50ms

A<sub>2</sub>

Templat

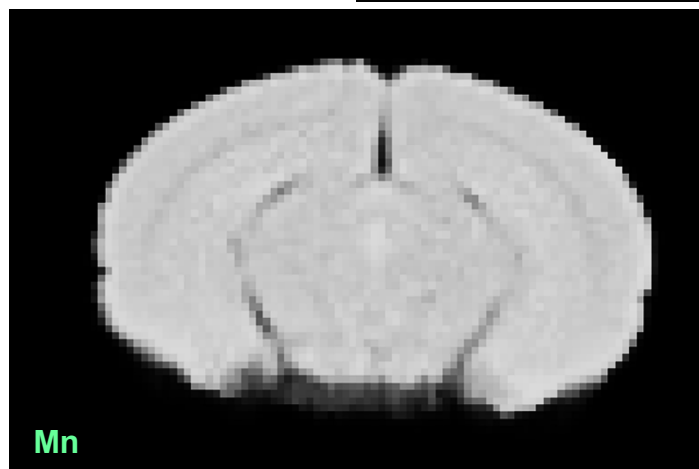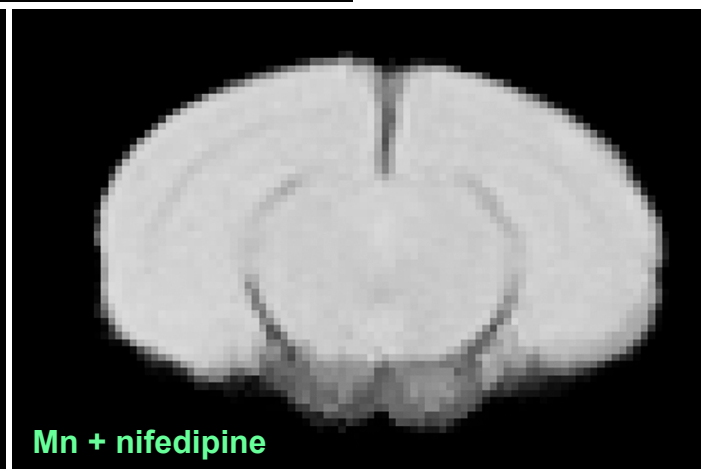A<sub>3</sub>

R1 maps

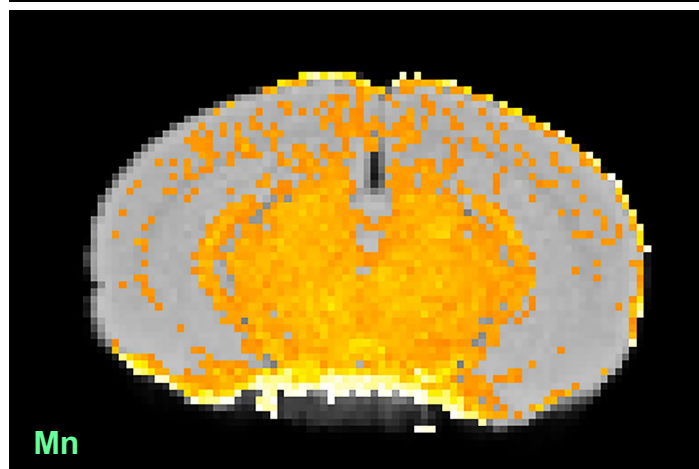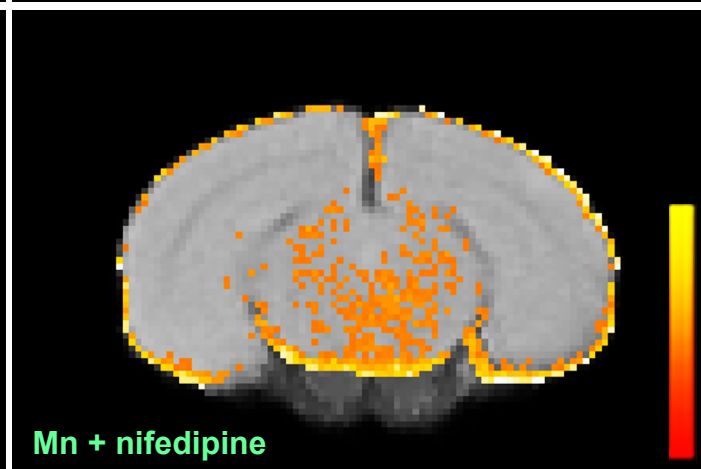A<sub>1</sub>

ROI

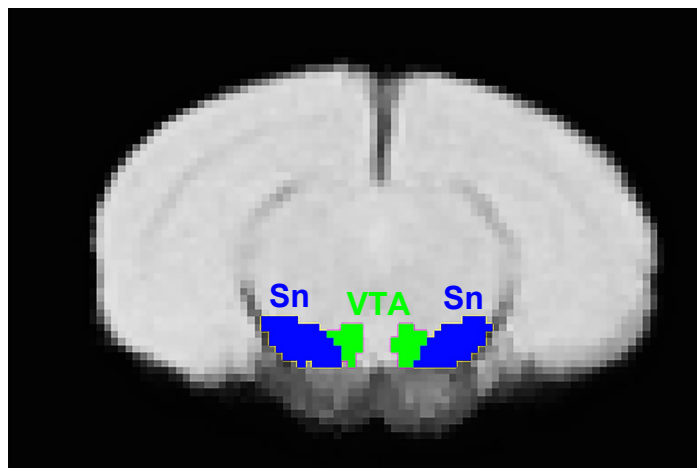

B

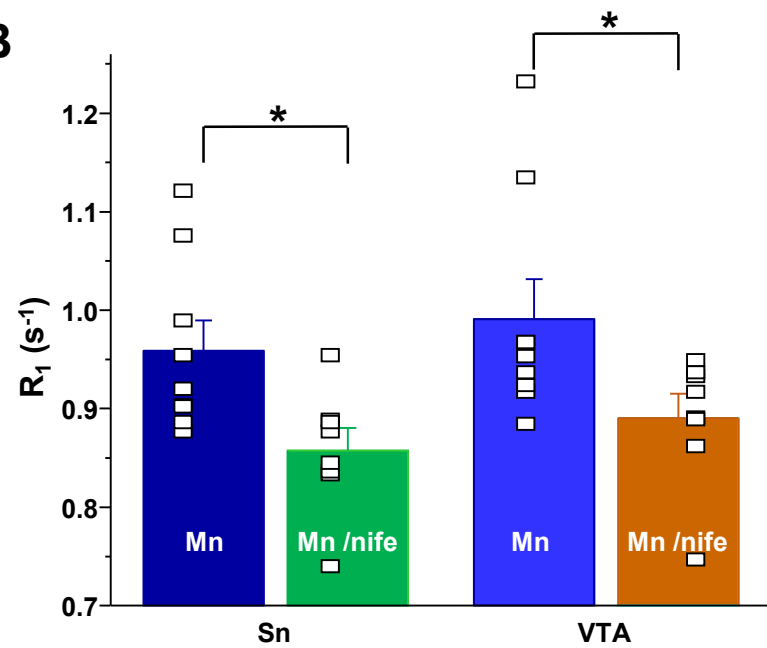

C

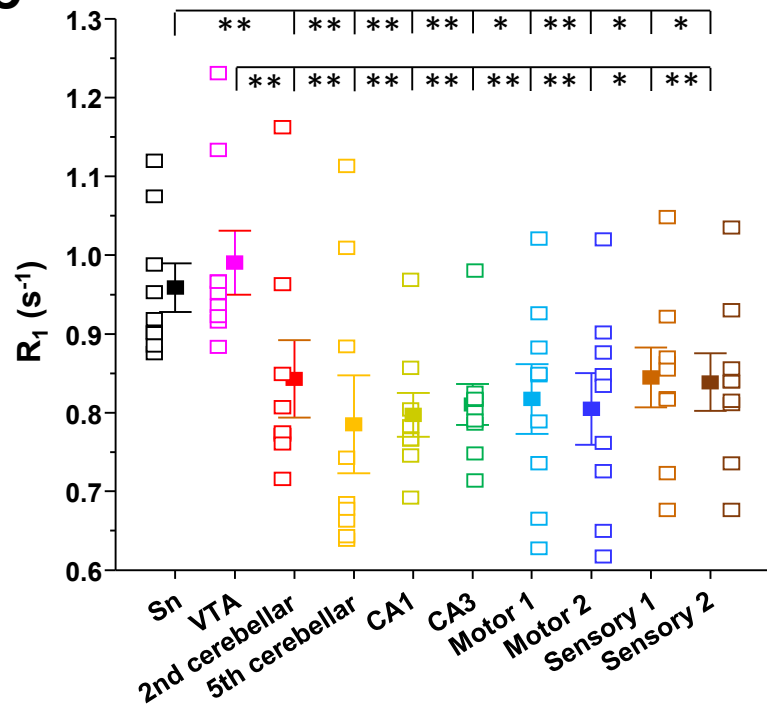

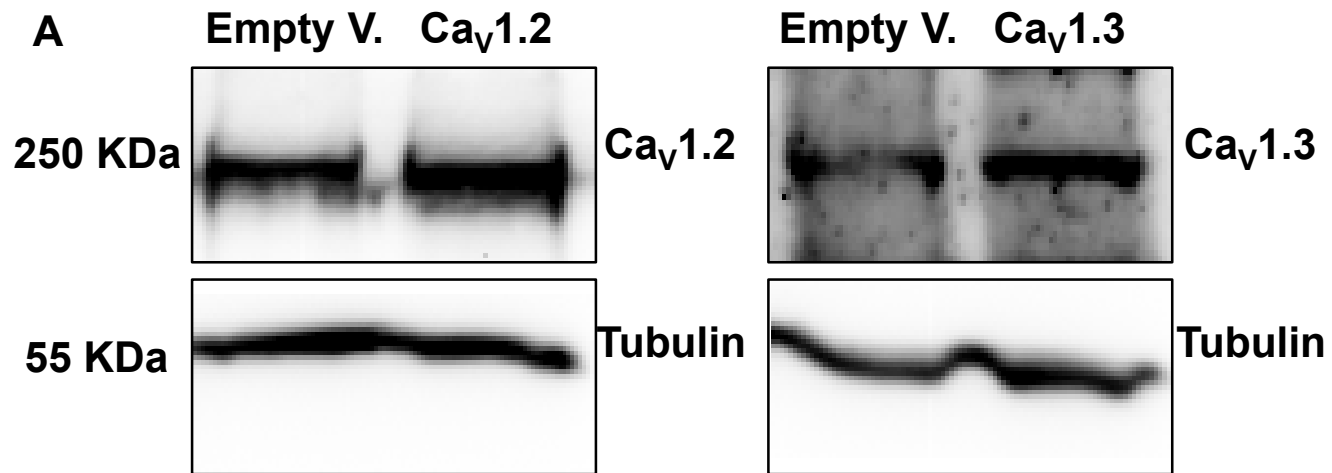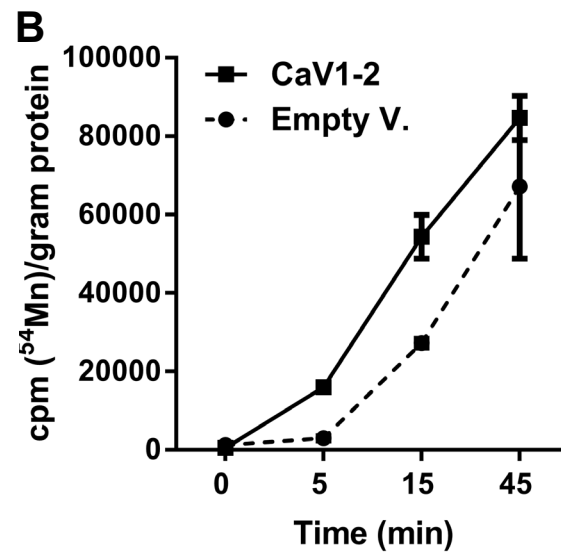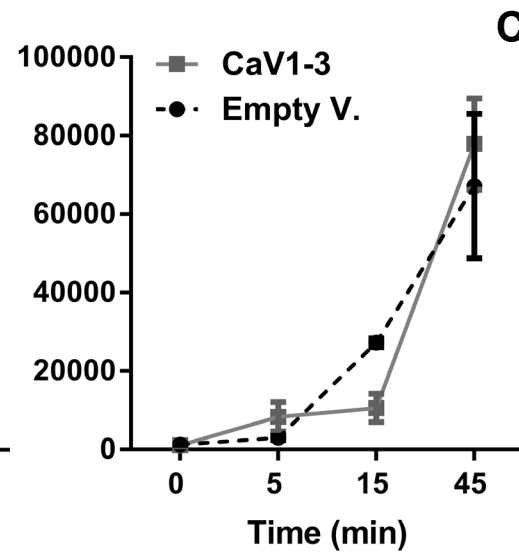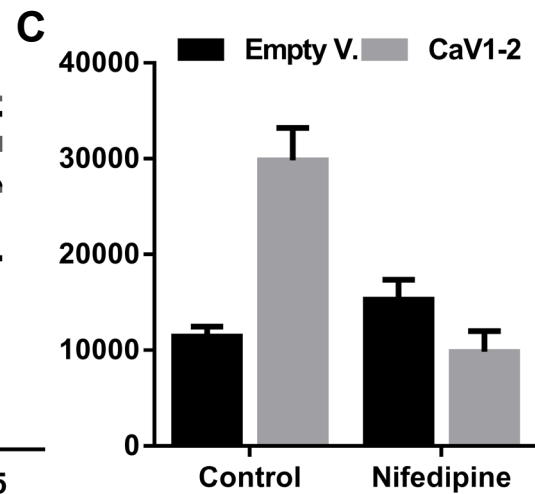

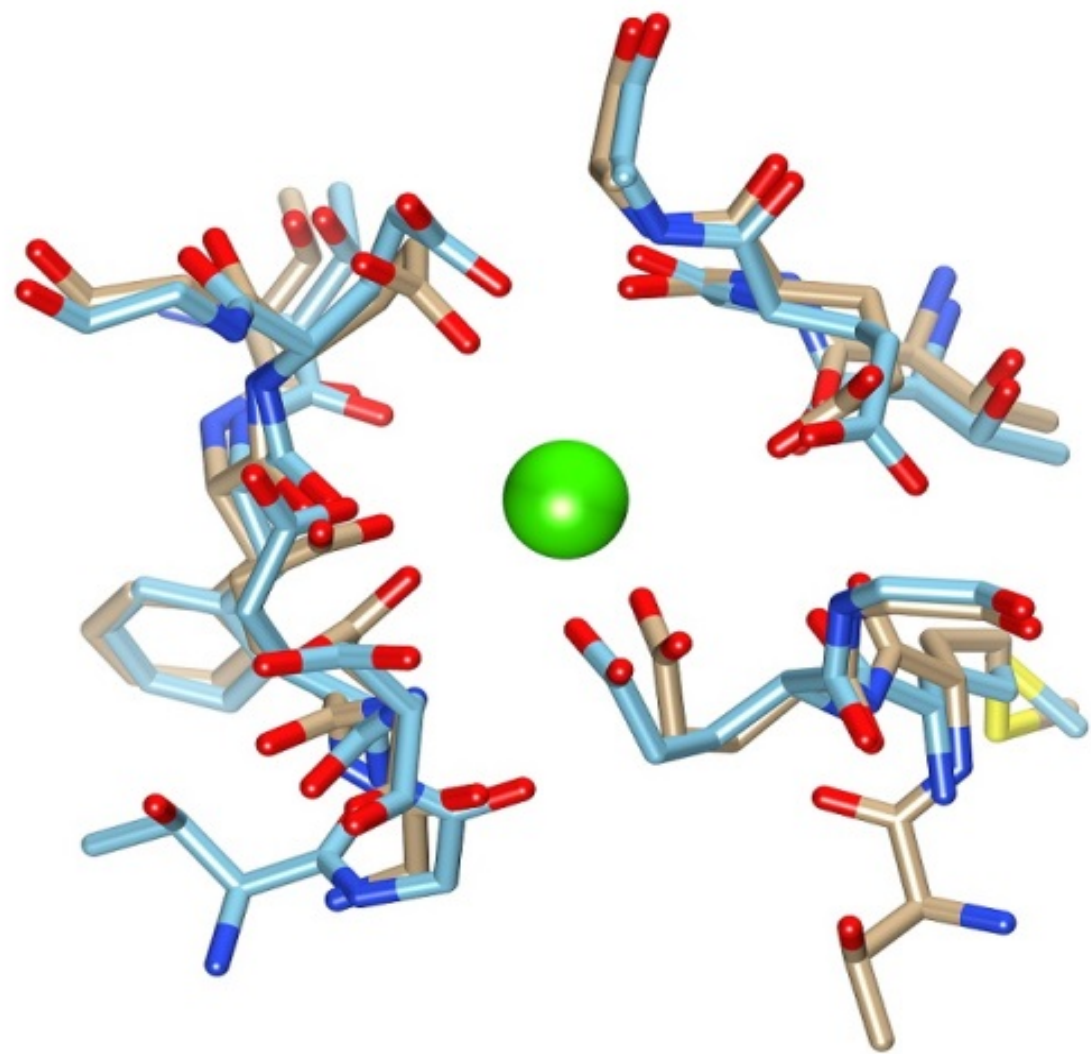

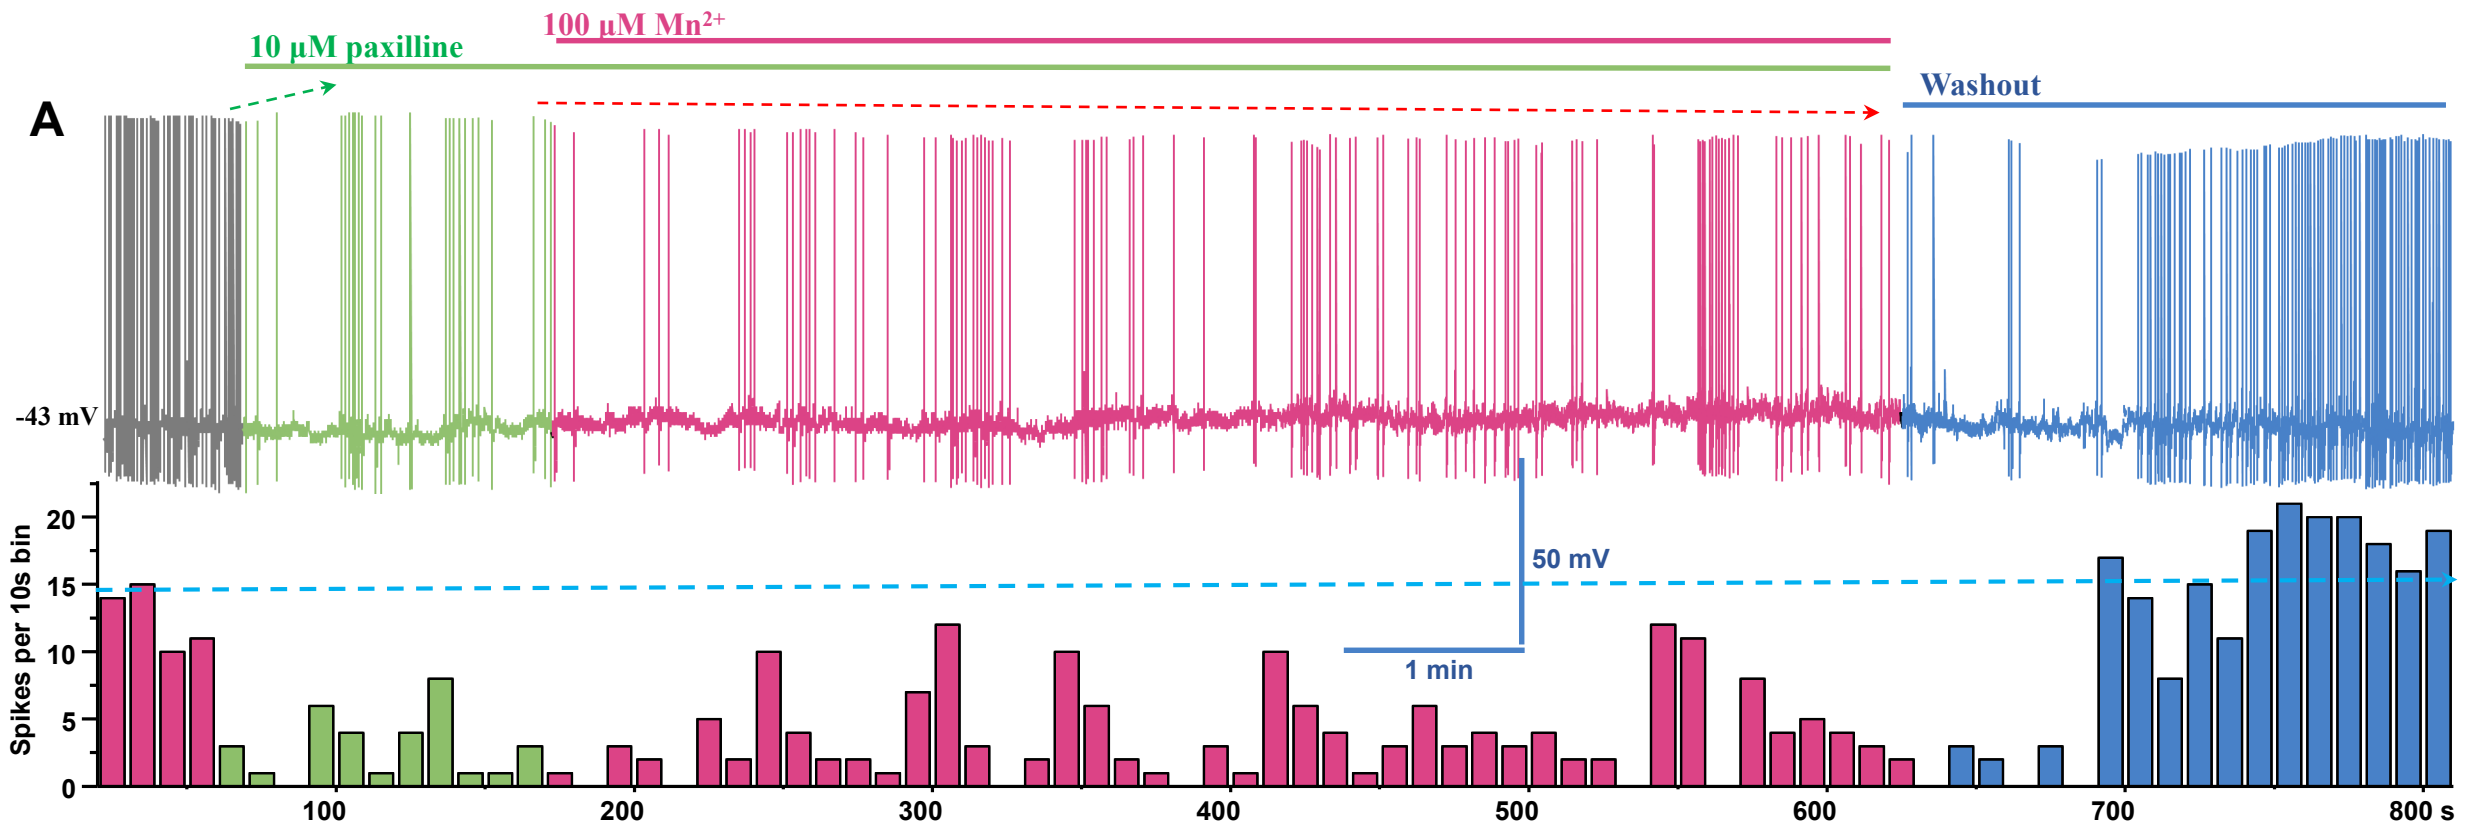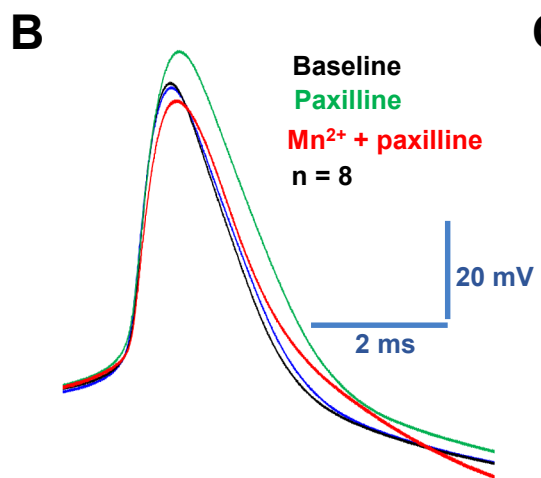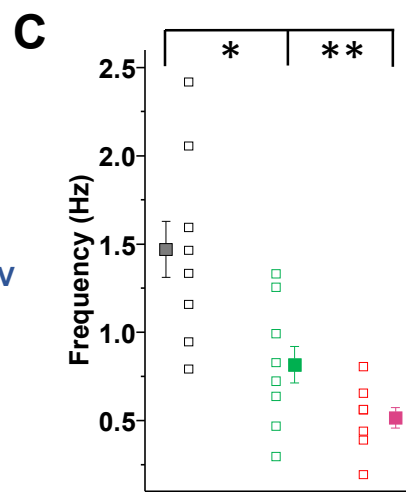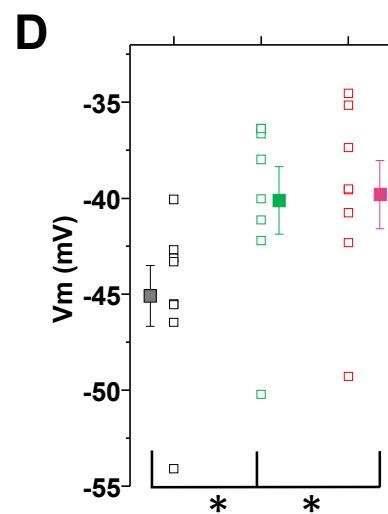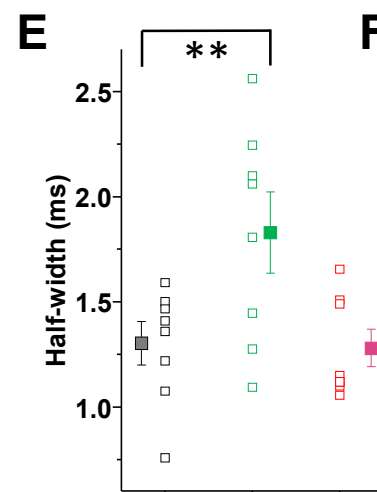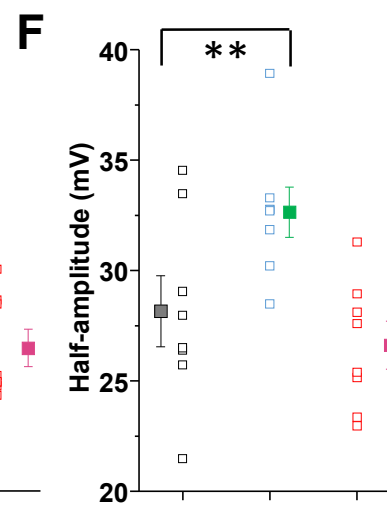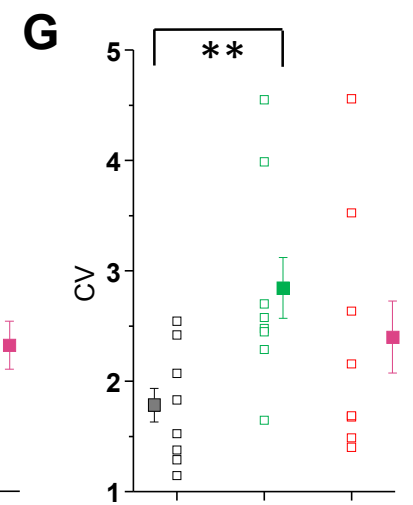



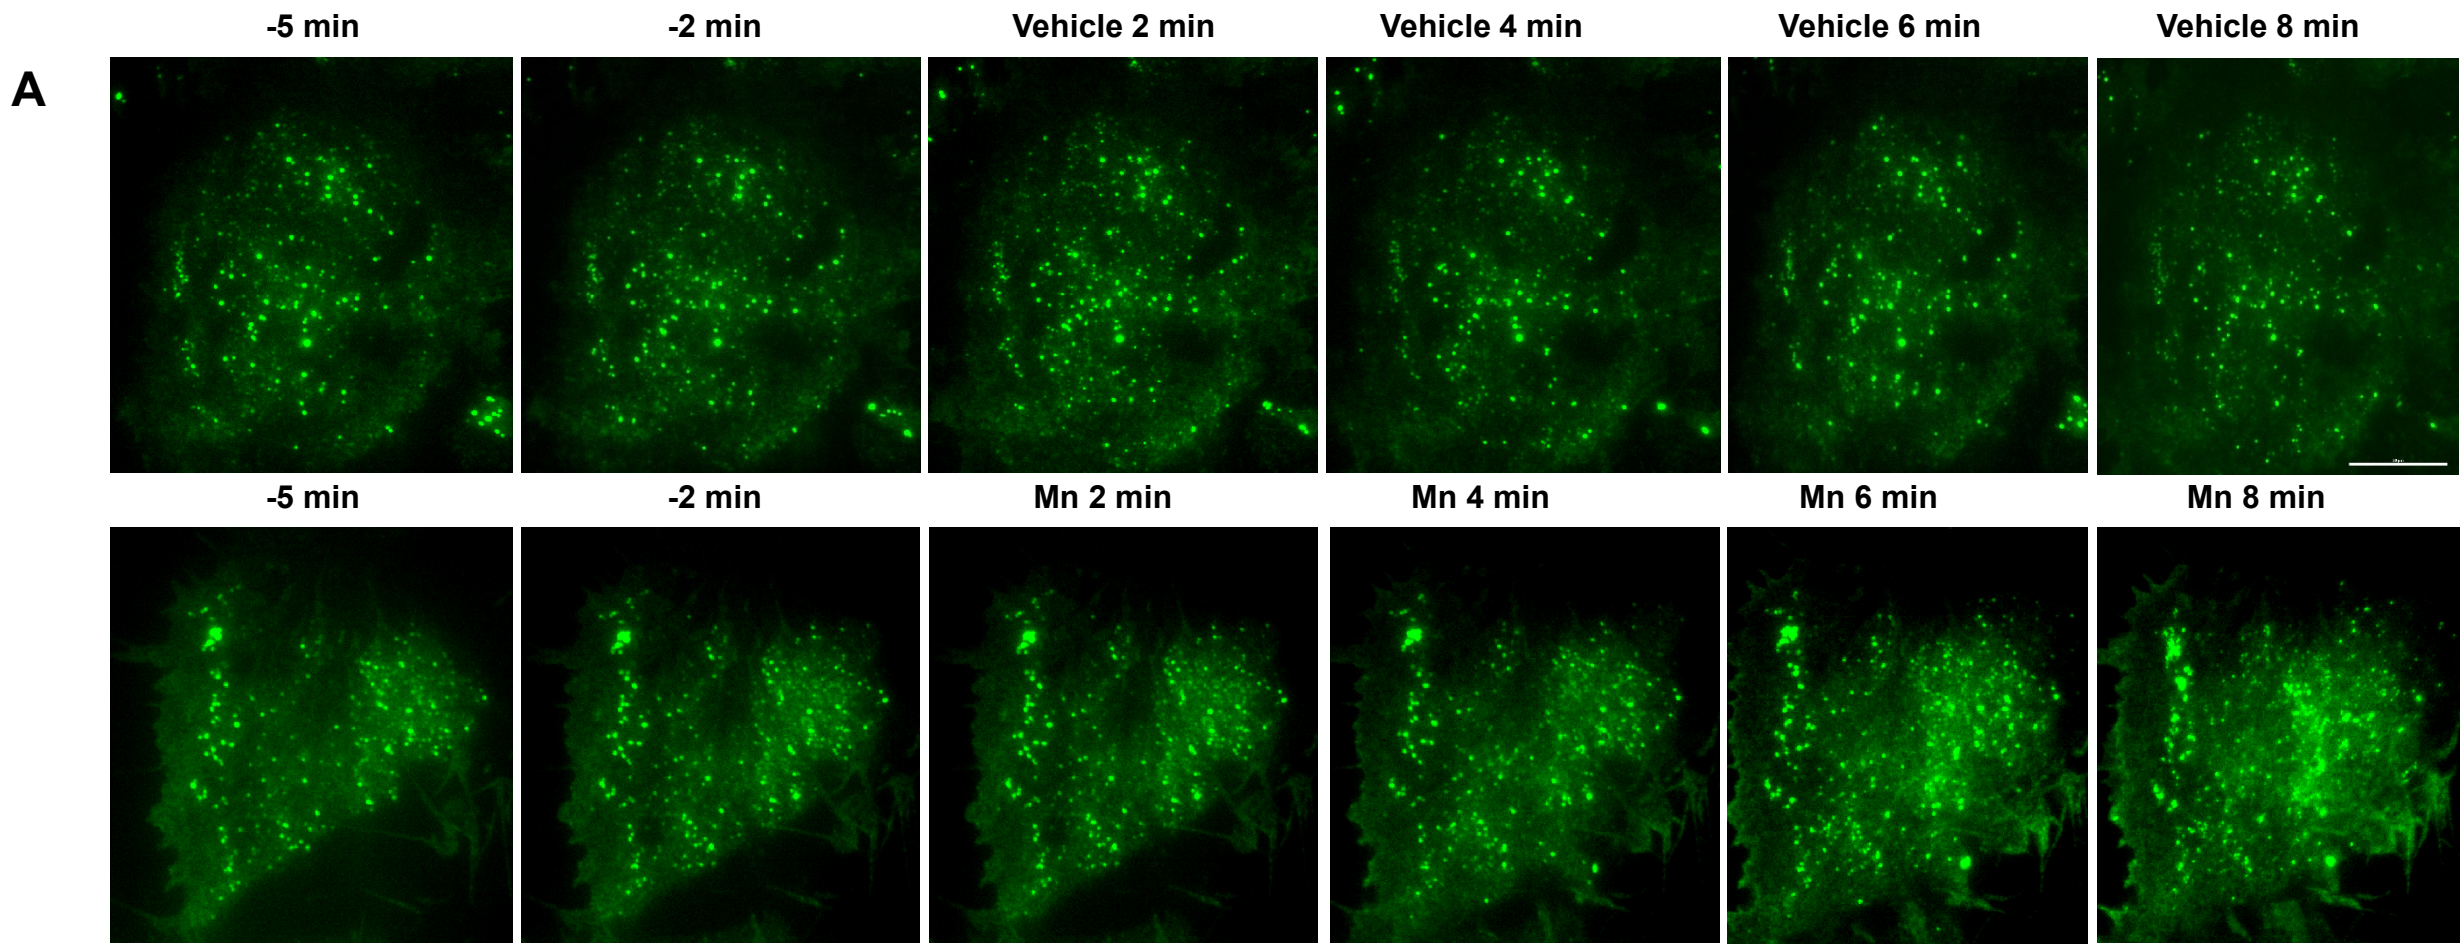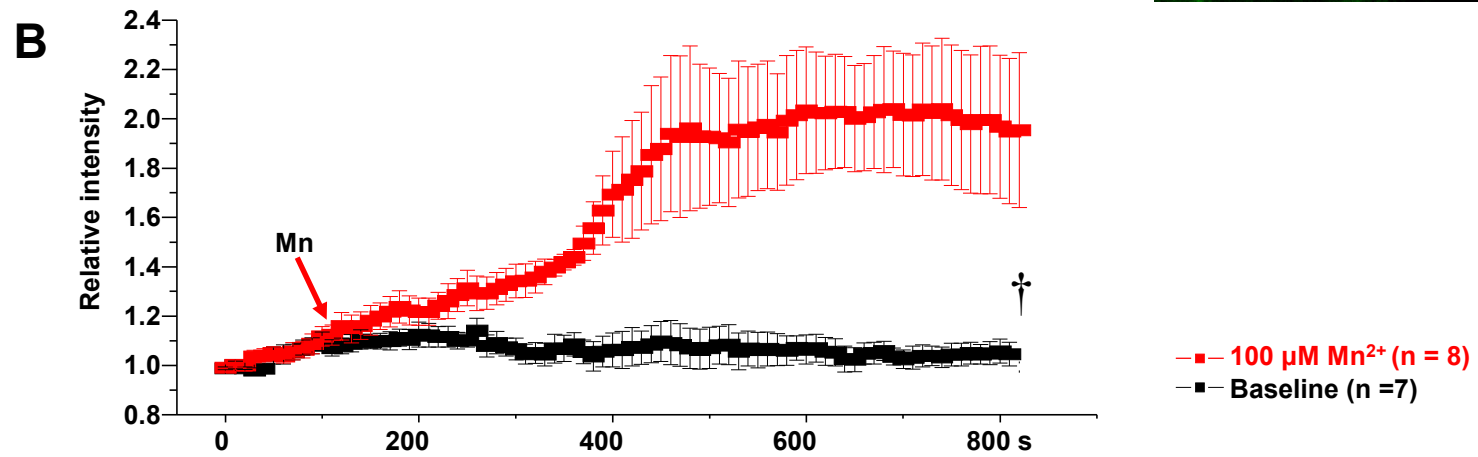

**A** BK currents

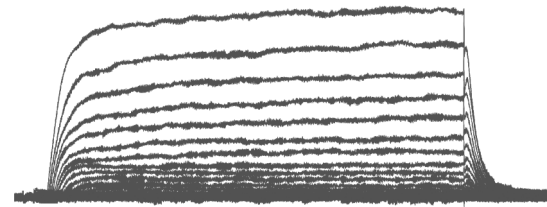

**B** Mn-stimulation of BK currents

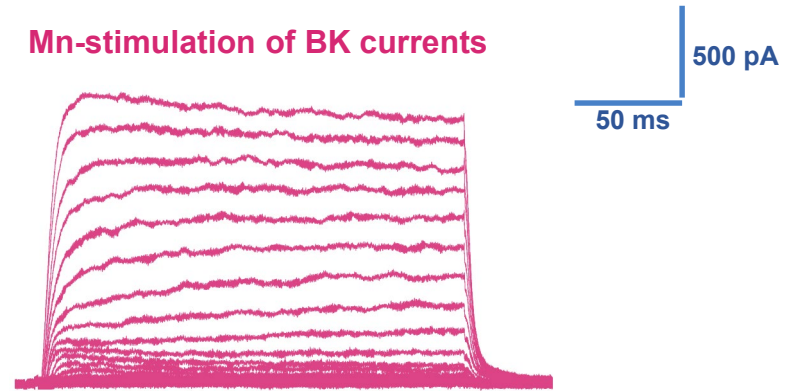

**C**

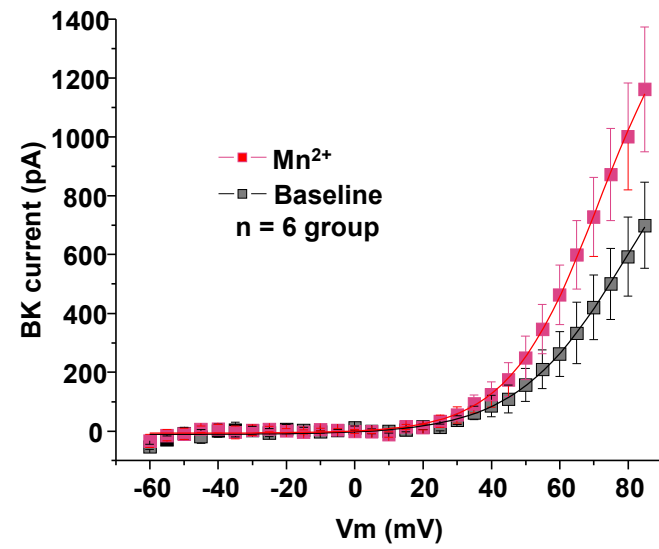

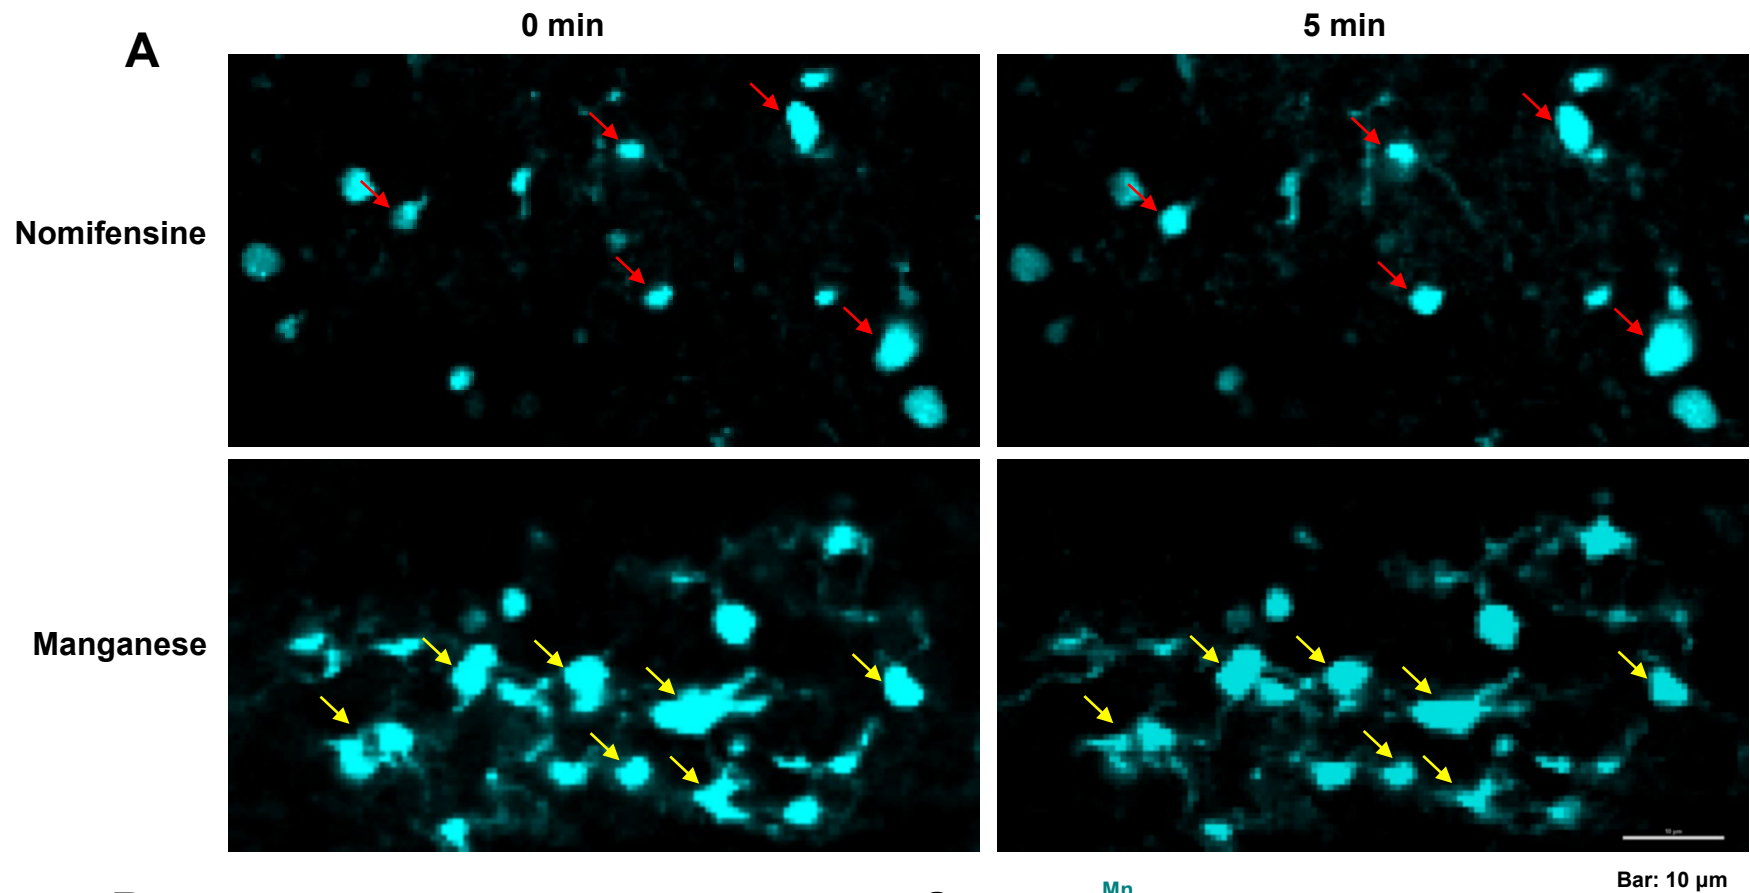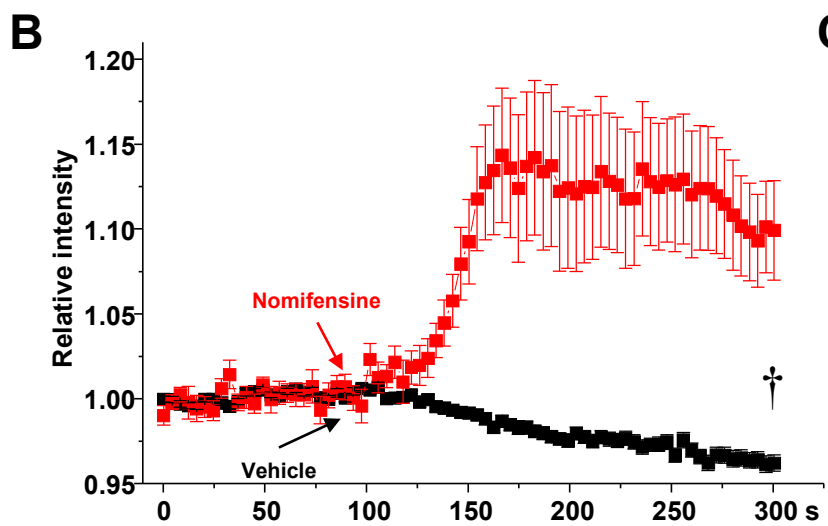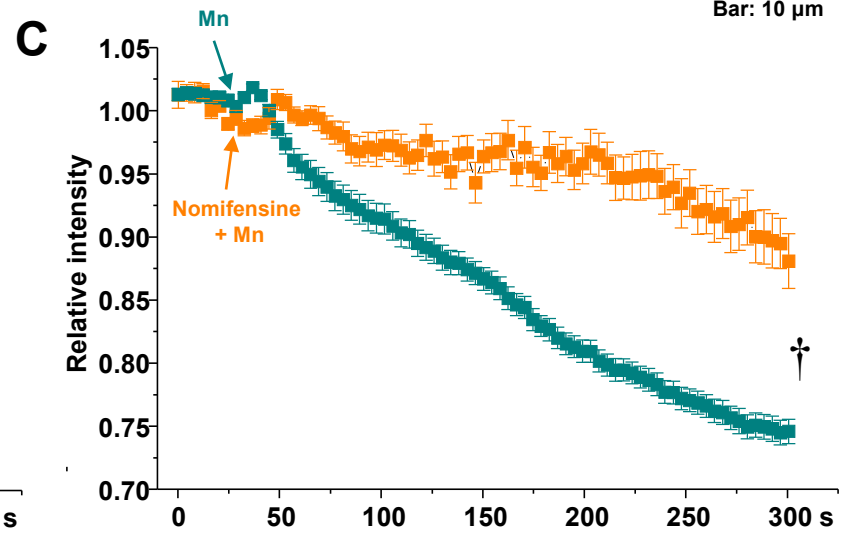

Supplemental Figure 1

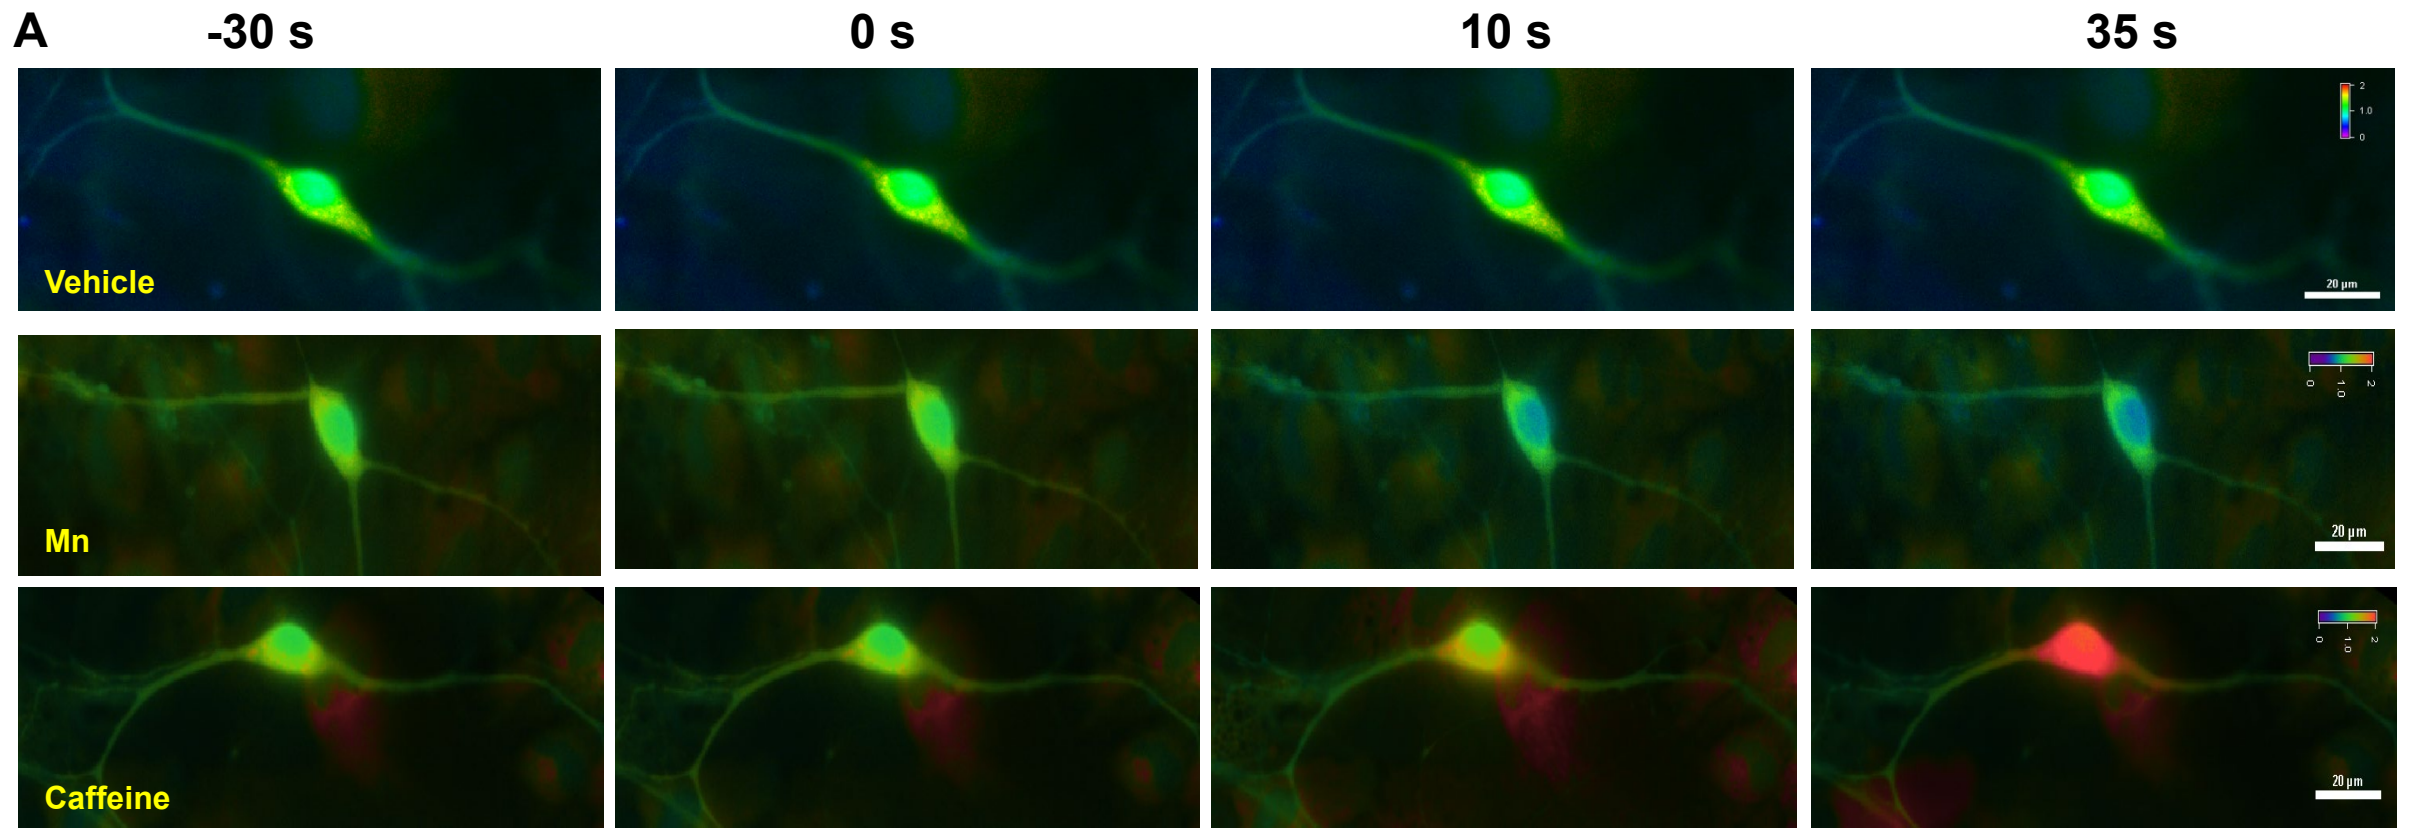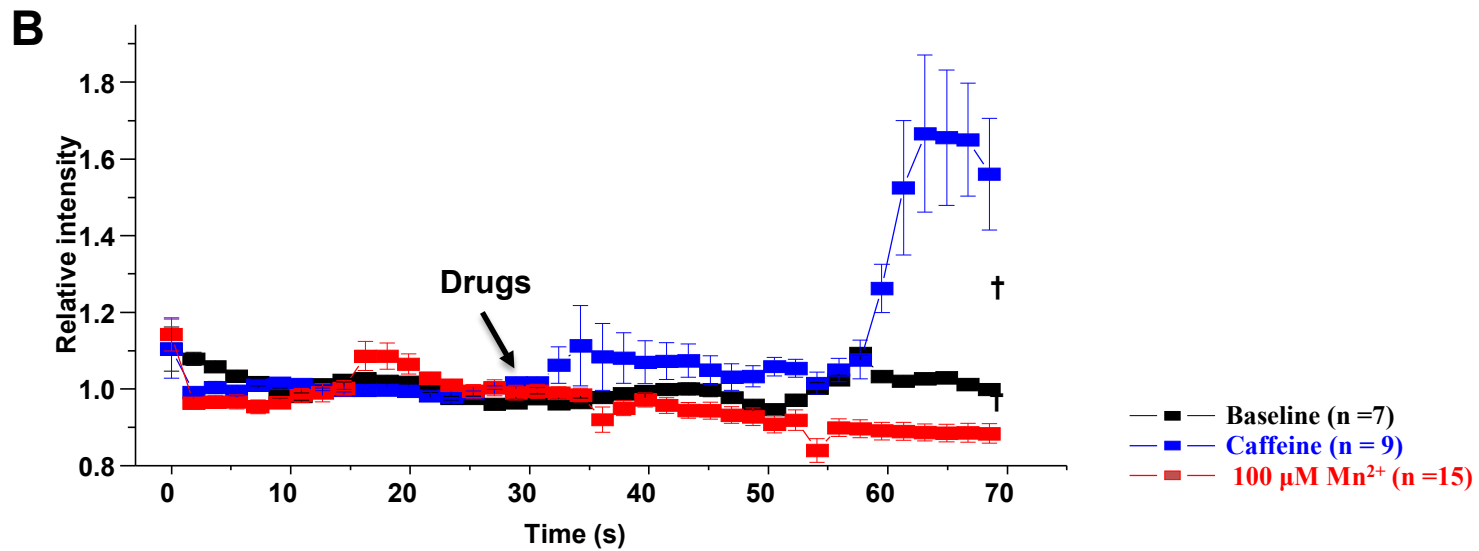

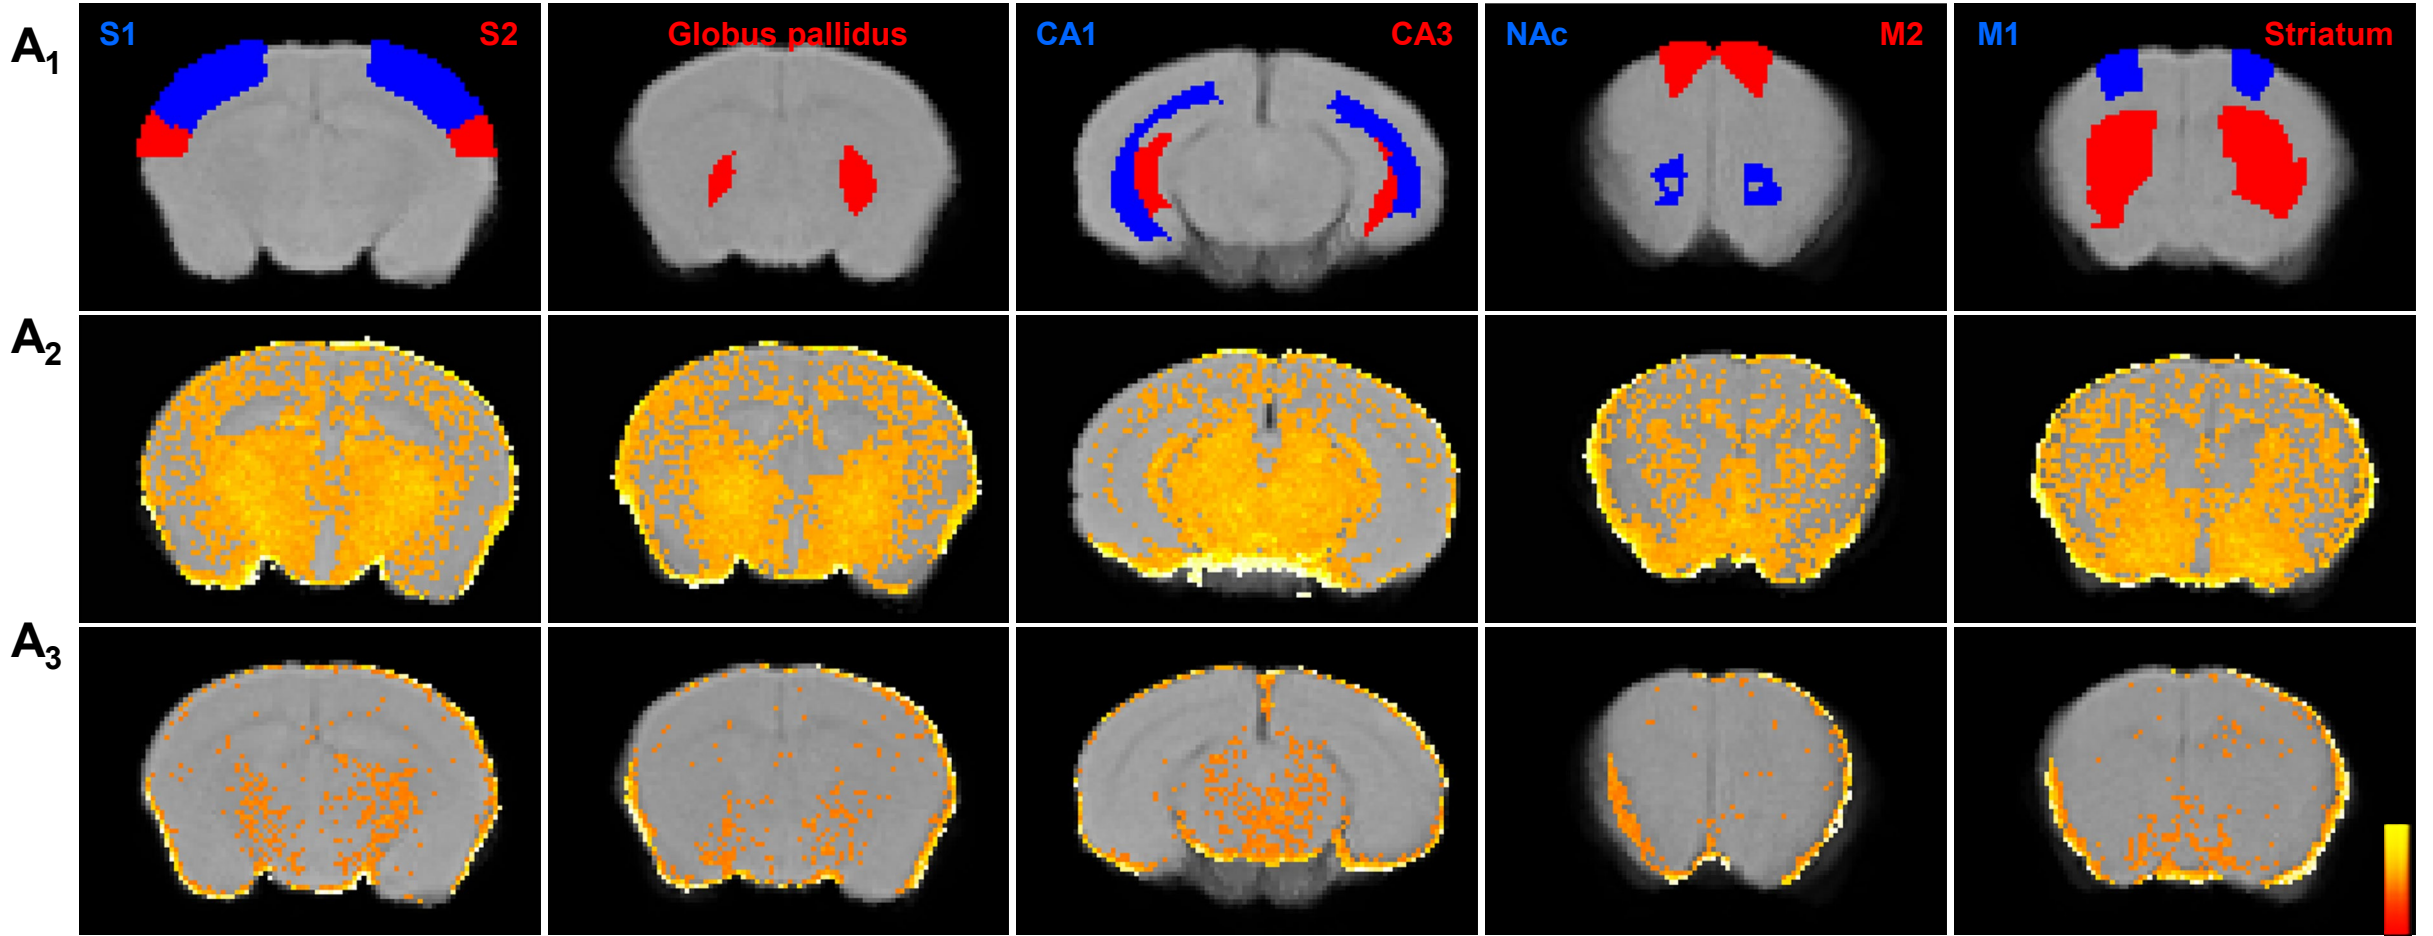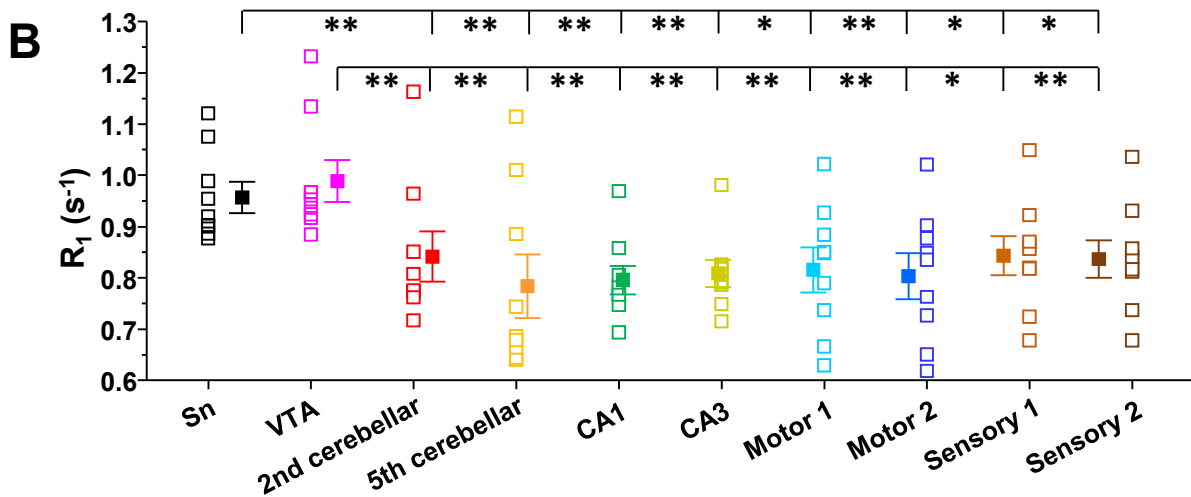

Supplemental Figure 3
